# Supplementary material
Source: PubMed Central journal article supplement (PMC10208429)
Supplement: ehp11363.s001.acco.pdf [file ehp11363.s001.acco.pdf]

**Note to readers with disabilities:** *EHP* strives to ensure that all journal content is accessible to all readers. However, some figures and Supplemental Material published in *EHP* articles may not conform to [508 standards](#) due to the complexity of the information being presented. If you need assistance accessing journal content, please contact [ehp508@niehs.nih.gov](mailto:ehp508@niehs.nih.gov). Our staff will work with you to assess and meet your accessibility needs within 3 working days.

### **Supplemental Material**

#### **Association of Temperature Thresholds with Heat Illness– and Cardiorespiratory-Related Emergency Visits during Summer Months in Alaska**

Micah B. Hahn, Grace Kuiper, and Sheryl Magzamen

#### **Table of Contents**

**Tables S1a-l.** Threshold analyses at Lags 0-5, stratified by sex

**Table S1a.** Threshold analyses at Lags 0-5, stratified by sex.

**Table S1b.** Odds ratios and 95% confidence intervals for emergency department (ED) visits among females for heat index (HI) on lag day 1 above versus below the threshold from single-day lag models in Anchorage, Fairbanks, and the Matanuska-Susitna Valley, Alaska, 2015-2019b.

**Table S1c.** Odds ratios and 95% confidence intervals for emergency department (ED) visits among females for heat index (HI) on lag day 2 above versus below the threshold from single-day lag models in Anchorage, Fairbanks, and the Matanuska-Susitna Valley, Alaska, 2015-2019.

**Table S1d.** Odds ratios and 95% confidence intervals for emergency department (ED) visits among females for heat index (HI) on lag day 3 above versus below the threshold from single-day lag models in Anchorage, Fairbanks, and the Matanuska-Susitna Valley, Alaska, 2015-2019.

**Table S1e.** Odds ratios and 95% confidence intervals for emergency department (ED) visits among females for heat index (HI) on lag day 4 above versus below the threshold from single-day lag models in Anchorage, Fairbanks, and the Matanuska-Susitna Valley, Alaska, 2015-2019.

**Table S1f.** Odds ratios and 95% confidence intervals for emergency department (ED) visits among females for heat index (HI) on lag day 5 above versus below the threshold from single-day lag models in Anchorage, Fairbanks, and the Matanuska-Susitna Valley, Alaska, 2015-2019.

**Table S1g.** Odds ratios and 95% confidence intervals for emergency department (ED) visits among males for same-day heat index (HI) above versus below the threshold from single-day lag models in Anchorage, Fairbanks, and the Matanuska-Susitna Valley, Alaska, 2015-2019.

**Table S1h.** Odds ratios and 95% confidence intervals for emergency department (ED) visits among males for heat index (HI) on lag day 1 above versus below the threshold from single-day lag models in Anchorage, Fairbanks, and the Matanuska-Susitna Valley, Alaska, 2015-2019.

**Table S1i.** Odds ratios and 95% confidence intervals for emergency department (ED) visits among males for heat index (HI) on lag day 2 above versus below the threshold from single-day lag models in Anchorage, Fairbanks, and the Matanuska-Susitna Valley, Alaska, 2015-2019.

**Table S1j.** Odds ratios and 95% confidence intervals for emergency department (ED) visits among males for heat index (HI) on lag day 3 above versus below the threshold from single-day lag models in Anchorage, Fairbanks, and the Matanuska-Susitna Valley, Alaska, 2015-2019.

**Table S1k.** Odds ratios and 95% confidence intervals for emergency department (ED) visits among males for heat index (HI) on lag day 4 above versus below the threshold from single-day lag models in Anchorage, Fairbanks, and the Matanuska-Susitna Valley, Alaska, 2015-2019.

**Table S1l.** Odds ratios and 95% confidence intervals for emergency department (ED) visits among males for heat index (HI) on lag day 5 above versus below the threshold from single-day lag models in Anchorage, Fairbanks, and the Matanuska-Susitna Valley, Alaska, 2015-2019.

**Tables S2a-l.** Threshold analyses at Lags 0-5, stratified by race.

**Table S2a.** Odds ratios and 95% confidence intervals for emergency department (ED) visits among Alaskan Native people for same-day heat index (HI) above versus below the threshold from single-day lag models in Anchorage, Fairbanks, and the Matanuska-Susitna Valley, Alaska, 2015-2019.

**Table S2b.** Odds ratios and 95% confidence intervals for emergency department (ED) visits among Alaskan Native people for heat index (HI) on lag day 1 above versus below the threshold from single-day lag models in Anchorage, Fairbanks, and the Matanuska-Susitna Valley, Alaska, 2015-2019.

**Table S2b.** Odds ratios and 95% confidence intervals for emergency department (ED) visits among Alaskan Native people for heat index (HI) on lag day 1 above versus below the threshold from single-day lag models in Anchorage, Fairbanks, and the Matanuska-Susitna Valley, Alaska, 2015-2019.

**Table S2c.** Odds ratios and 95% confidence intervals fo emergency department (ED) visits among Alaskan Native people for heat index (HI) on lag day 2 above versus below the threshold from single-day lag models in Anchorage, Fairbanks, and the Matanuska-Susitna Valley, Alaska, 2015-2019.

**Table S2d.** Odds ratios and 95% confidence intervals for emergency department (ED) visits among Alaskan Native people for heat index (HI) on lag day 3 above versus below the threshold from single-day lag models in Anchorage, Fairbanks, and the Matanuska-Susitna Valley, Alaska, 2015-2019.

**Table S2e.** Odds ratios and 95% confidence intervals for emergency department (ED) visits among Alaskan Native people for heat index (HI) on lag day 4 above versus below the threshold from single-day lag models in Anchorage, Fairbanks, and the Matanuska-Susitna Valley, Alaska, 2015-2019.

**Table S2f.** Odds ratios and 95% confidence intervals for emergency department (ED) visits among Alaskan Native people for heat index (HI) on lag day 5 above versus below the threshold from single-day lag models in Anchorage, Fairbanks, and the Matanuska-Susitna Valley, Alaska, 2015-2019.

**Table S2g.** Odds ratios and 95% confidence intervals for emergency department (ED) visits among Non-Alaskan Native people for same-day heat index (HI) above versus below the threshold from single-day lag models in Anchorage, Fairbanks, and the Matanuska-Susitna Valley, Alaska, 2015-2019.

**Table S2h.** Odds ratios and 95% confidence intervals for emergency department (ED) visits among Non-Alaskan Native people for heat index (HI) on lag day 1 above versus below the threshold from single-day lag models in Anchorage, Fairbanks, and the Matanuska-Susitna Valley, Alaska, 2015-2019.

**Table S2i.** Odds ratios and 95% confidence intervals for emergency department (ED) visits among Non-Alaskan Native people for heat index (HI) on lag day 2 above versus below the threshold from single-day lag models in Anchorage, Fairbanks, and the Matanuska-Susitna Valley, Alaska, 2015-2019.

**Table S2j.** Odds ratios and 95% confidence intervals for emergency department (ED) visits among Non-Alaskan Native people for heat index (HI) on lag day 3 above versus below the threshold from single-day lag models in Anchorage, Fairbanks, and the Matanuska-Susitna Valley, Alaska, 2015-2019.

**Table S2k.** Odds ratios and 95% confidence intervals for emergency department (ED) visits among Non-Alaskan Native people for heat index (HI) on lag day 4 above versus below the threshold from single-day lag models in Anchorage, Fairbanks, and the Matanuska-Susitna Valley, Alaska, 2015-2019.

**Table S2l.** Odds ratios and 95% confidence intervals for emergency department (ED) visits among Non-Alaskan Native people for heat index (HI) on lag day 5 above versus below the threshold from single-day lag models in Anchorage, Fairbanks, and the Matanuska-Susitna Valley, Alaska, 2015-2019.

**Tables S3a-r.** Threshold analyses at Lags 0-5, stratified by age

**Table S3a.** Odds ratios and 95% confidence intervals for emergency department (ED) visits among <15-year-olds for same-day heat index (HI) above versus below the threshold from single-day lag models in Anchorage, Fairbanks, and the Matanuska-Susitna Valley, Alaska, 2015-2019.

**Table S3b.** Odds ratios and 95% confidence intervals for emergency department (ED) visits among <15-year-olds for heat index (HI) on lag day 1 above versus below the threshold from single-day lag models in Anchorage, Fairbanks, and the Matanuska-Susitna Valley, Alaska, 2015-2019.

**Table S3c.** Odds ratios and 95% confidence intervals for emergency department (ED) visits among <15-year-olds for heat index (HI) on lag day 2 above versus below the threshold from single-day lag models in Anchorage, Fairbanks, and the Matanuska-Susitna Valley, Alaska, 2015-2019.

**Table S3d.** Odds ratios and 95% confidence intervals for emergency department (ED) visits among <15-year-olds for heat index (HI) on lag day 3 above versus below the threshold from single-day lag models in Anchorage, Fairbanks, and the Matanuska-Susitna Valley, Alaska, 2015-2019.

**Table S3e.** Odds ratios and 95% confidence intervals for emergency department (ED) visits among <15-year-olds for heat index (HI) on lag day 4 above versus below the threshold from single-day lag models in Anchorage, Fairbanks, and the Matanuska-Susitna Valley, Alaska, 2015-2019.

**Table S3f.** Odds ratios and 95% confidence intervals for emergency department (ED) visits among <15-year-olds for heat index (HI) on lag day 5 above versus below the threshold from single-day lag models in Anchorage, Fairbanks, and the Matanuska-Susitna Valley, Alaska, 2015-2019.

**Table S3g.** Odds ratios and 95% confidence intervals for emergency department (ED) visits among 15-65 year-olds for same-day heat index (HI) above versus below the threshold from single-day lag models in Anchorage, Fairbanks, and the Matanuska-Susitna Valley, Alaska, 2015-2019.

**Table S3h.** Odds ratios and 95% confidence intervals for emergency department (ED) visits among 15-65 year-olds for heat index (HI) on lag day 1 above versus below the threshold from single-day lag models in Anchorage, Fairbanks, and the Matanuska-Susitna Valley, Alaska, 2015-2019.

**Table S3i.** Odds ratios and 95% confidence intervals for emergency department (ED) visits among 15-65 year-olds for heat index (HI) on lag day 2 above versus below the threshold from single-day lag models in Anchorage, Fairbanks, and the Matanuska-Susitna Valley, Alaska, 2015-2019.

**Table S3j.** Odds ratios and 95% confidence intervals for emergency department (ED) visits among 15-65 year-olds for heat index (HI) on lag day 3 above versus below the threshold from single-day lag models in Anchorage, Fairbanks, and the Matanuska-Susitna Valley, Alaska, 2015-2019.

**Table S3k.** Odds ratios and 95% confidence intervals for emergency department (ED) visits among 15-65 year-olds for heat index (HI) on lag day 4 above versus below the threshold from single-day lag models in Anchorage, Fairbanks, and the Matanuska-Susitna Valley, Alaska, 2015-2019.

**Table S3l.** Odds ratios and 95% confidence intervals for emergency department (ED) visits among 15-65 year-olds for heat index (HI) on lag day 5 above versus below the threshold from single-day lag models in Anchorage, Fairbanks, and the Matanuska-Susitna Valley, Alaska, 2015-2019.

**Table S3m.** Odds ratios and 95% confidence intervals for emergency department (ED) visits among >65-year-olds for same-day heat index (HI) above versus below the threshold from single-day lag models in Anchorage, Fairbanks, and the Matanuska-Susitna Valley, Alaska, 2015-2019.

**Table S3n.** Odds ratios and 95% confidence intervals for ED emergency department (ED) visits among >65-year-olds for heat index (HI) on lag day 1 above versus below the threshold from single-day lag models in Anchorage, Fairbanks, and the Matanuska-Susitna Valley, Alaska, 2015-2019.

**Table S3o.** Odds ratios and 95% confidence intervals for emergency department (ED) visits among >65-year-olds for heat index (HI) on lag day 2 above versus below the threshold from single-day lag models in Anchorage, Fairbanks, and the Matanuska-Susitna Valley, Alaska, 2015-2019.

**Table S3p.** Odds ratios and 95% confidence intervals for emergency department (ED) visits among >65-year-olds for heat index (HI) on lag day 3 above versus below the threshold from single-day lag models in Anchorage, Fairbanks, and the Matanuska-Susitna Valley, Alaska, 2015-2019.

**Table S3q.** Odds ratios and 95% confidence intervals for emergency department (ED) visits among >65-year-olds for heat index (HI) on lag day 4 above versus below the threshold from single-day lag models in Anchorage, Fairbanks, and the Matanuska-Susitna Valley, Alaska, 2015-2019.

**Table S3r.** Odds ratios and 95% confidence intervals for emergency department (ED) visits among >65-year-olds for heat index (HI) on lag day 5 above versus below the threshold from single-day lag models in Anchorage, Fairbanks, and the Matanuska-Susitna Valley, Alaska, 2015-2019.

**Tables S4a-g.** Acute heatwave analysis stratified by sex, race, and age

**Table S4a.** Odds ratios and 95% confidence intervals for emergency department (ED) visits on heatwave days versus non-heatwave days among females in Anchorage, Fairbanks, and the Matanuska-Susitna Valley, Alaska, 2015-2019.

**Table S4b.** Odds ratios and 95% confidence intervals for emergency department (ED) visits on heatwave days versus non-heatwave days among males in Anchorage, Fairbanks, and the Matanuska-Susitna Valley, Alaska, 2015-2019.

**Table S4c.** Odds ratios and 95% confidence intervals for emergency department (ED) visits on heatwave days versus non-heatwave days among Alaska Native people in Anchorage, Fairbanks, and the Matanuska-Susitna Valley, Alaska, 2015-2019.

**Table S4d.** Odds ratios and 95% confidence intervals for emergency department (ED) visits on heatwave days versus non-heatwave days among non-Alaska Native people in Anchorage, Fairbanks, and the Matanuska-Susitna Valley, Alaska, 2015-2019.

**Table S4e.** Odds ratios and 95% confidence intervals for emergency department (ED) visits on heatwave days versus non-heatwave days among <15-year-olds in Anchorage, Fairbanks, and the Matanuska-Susitna Valley, Alaska, 2015-2019.

**Table S4f.** Odds ratios and 95% confidence intervals for emergency department (ED) visits on heatwave days versus non-heatwave days among 15-65 year-olds in Anchorage, Fairbanks, and the Matanuska-Susitna Valley, Alaska, 2015-2019.

**Table S4g.** Odds ratios and 95% confidence intervals for emergency department (ED) visits on heatwave days versus non-heatwave days among >65-year-olds in Anchorage, Fairbanks, and the Matanuska-Susitna Valley, Alaska, 2015-2019.

**Tables S5a-g.** Ongoing heatwave analysis stratified by sex, race, and age

**Table S5a.** Odds ratios and 95% confidence intervals for one additional previous day on which the observed heat index (HI) was above the indicated threshold among females in Anchorage, Fairbanks, and the Matanuska-Susitna Valley, Alaska, 2015-2019.

**Table S5b.** Odds ratios and 95% confidence intervals for one additional previous day on which the observed heat index (HI) was above the indicated threshold among males in Anchorage, Fairbanks, and the Matanuska-Susitna Valley, Alaska, 2015-2019.

**Table S5c.** Odds ratios and 95% confidence intervals for one additional previous day on which the observed heat index (HI) was above the indicated threshold among Alaska Native people in Anchorage, Fairbanks, and the Matanuska-Susitna Valley, Alaska, 2015-2019.

**Table S5d.** Odds ratios and 95% confidence intervals for one additional previous day on which the observed heat index (HI) was above the indicated threshold among non-Alaska Native people in Anchorage, Fairbanks, and the Matanuska-Susitna Valley, Alaska, 2015-2019.

**Table S5e.** Odds ratios and 95% confidence intervals for one additional previous day on which the observed heat index (HI) was above the indicated threshold among <15 year-olds in Anchorage, Fairbanks, and the Matanuska-Susitna Valley, Alaska, 2015-2019.

**Table S5f.** Odds ratios and 95% confidence intervals for one additional previous day on which the observed heat index (HI) was above the indicated threshold among 15-65 year olds in Anchorage, Fairbanks, and the Matanuska-Susitna Valley, Alaska, 2015-2019.

**Table S5g.** Odds ratios and 95% confidence intervals for one additional previous day on which the observed heat index (HI) was above the indicated threshold among >65 year-olds in Anchorage, Fairbanks, and the Matanuska-Susitna Valley, Alaska, 2015-2019.

**Figure S1.** Legend for all Supplemental Figures.

**Figure S2.** Significant odds ratios (95% CI does not include the null) for asthma-related emergency department visits by demographic group on days above vs. below the Heat Index (HI) threshold, in Anchorage, Fairbanks, and the Matanuska-Susitna Valley, Alaska, 2015- 2019. Conditional logistic regression models adjusted for daily PM<sub>2.5</sub> concentration were used to estimate odds ratios. See Figure S1 for legend. Data for this figure can be found in Tables S1a-1, Tables S2a-1, and Tables S3a-r.

**Figure S3.** Significant odds ratios (95% CI does not include the null) for bronchitis-related emergency department visits by demographic group on days above vs. below the Heat Index (HI) threshold, in Anchorage, Fairbanks, and the Matanuska-Susitna Valley, Alaska, 2015- 2019. Conditional logistic regression models adjusted for daily PM<sub>2.5</sub> concentration were used to estimate odds ratios. See Figure S1 for legend. Data for this figure can be found in Tables S1a-1, Tables S2a-1, and Tables S3a-r.

**Figure S4.** Significant odds ratios (95% CI does not include the null) for COPD-related emergency department visits by demographic group on days above vs. below the Heat Index (HI) threshold, in Anchorage, Fairbanks, and the Matanuska-Susitna Valley, Alaska, 2015- 2019. Conditional logistic regression models adjusted for daily PM<sub>2.5</sub> concentration were used to estimate odds ratios. See Figure S1 for legend. Data for this figure can be found in Tables S1a-1, Tables S2a-1, and Tables S3a-r.

**Figure S5.** Significant odds ratios (95% CI does not include the null) for pneumonia-related emergency department visits by demographic group on days above vs. below the Heat Index (HI) threshold, in Anchorage, Fairbanks, and the Matanuska-Susitna Valley, Alaska, 2015- 2019. Conditional logistic regression models adjusted for daily PM<sub>2.5</sub> concentration were used to estimate odds ratios. See Figure S1 for legend. Data for this figure can be found in Tables S1a-1, Tables S2a-1, and Tables S3a-r.

**Figure S6.** Significant odds ratios (95% CI does not include the null) for arrhythmia-related emergency department visits by demographic group on days above vs. below the Heat Index (HI) threshold, in Anchorage, Fairbanks, and the Matanuska-Susitna Valley, Alaska, 2015- 2019. Conditional logistic regression models adjusted for daily PM<sub>2.5</sub> concentration were used to estimate odds ratios. See Figure S1 for legend. Data for this figure can be found in Tables S1a-1, Tables S2a-1, and Tables S3a-r.

**Figure S7.** Significant odds ratios (95% CI does not include the null) for cerebrovascular-related emergency department visits by demographic group on days above vs. below the Heat Index (HI) threshold, in Anchorage, Fairbanks, and the Matanuska-Susitna Valley, Alaska, 2015- 2019. Conditional logistic regression models adjusted for daily PM<sub>2.5</sub> concentration were used to estimate odds ratios. See Figure S1 for legend. Data for this figure can be found in Tables S1a-1, Tables S2a-1, and Tables S3a-r.

**Figure S8.** Significant odds ratios (95% CI does not include the null) for heart failure-related emergency department visits by demographic group on days above vs. below the Heat Index (HI) threshold, in Anchorage, Fairbanks, and the Matanuska-Susitna Valley, Alaska, 2015- 2019. Conditional logistic regression models adjusted for daily PM<sub>2.5</sub> concentration were used to estimate odds ratios. See Figure S1 for legend. Data for this figure can be found in Tables S1a-1, Tables S2a-1, and Tables S3a-r.

**Figure S9.** Significant odds ratios (95% CI does not include the null) for ischemia-related emergency department visits by demographic group on days above vs. below the Heat Index (HI) threshold, in Anchorage, Fairbanks, and the Matanuska-Susitna Valley, Alaska, 2015- 2019. Conditional logistic regression models adjusted for daily PM<sub>2.5</sub> concentration were used to estimate odds ratios. See Figure S1 for legend. Data for this figure can be found in Tables S1a-1, Tables S2a-1, and Tables S3a-r.

**Figure S10.** Significant odds ratios (95% CI does not include the null) for myocardial infarction-related emergency department visits by demographic group on days above vs. below the Heat Index (HI) threshold, in Anchorage, Fairbanks, and the Matanuska-Susitna Valley, Alaska, 2015- 2019. Conditional logistic regression models adjusted for daily PM<sub>2.5</sub> concentration were used to estimate odds ratios. See Figure S1 for legend. Data for this figure can be found in Tables S1a-1, Tables S2a-1, and Tables S3a-r.

**Figure S11.** Significant odds ratios (95% CI does not include the null) for heat illness-related emergency department visits by demographic group on days above vs. below the Heat Index (HI) threshold, in Anchorage, Fairbanks, and the Matanuska-Susitna Valley, Alaska, 2015- 2019. Conditional logistic regression models adjusted for daily PM<sub>2.5</sub> concentration were used to estimate odds ratios. See Figure S1 for legend. Data for this figure can be found in Tables S1a-1, Tables S2a-1, and Tables S3a-r.



## Tables S1a-1 – Threshold analyses at Lags 0-5, stratified by sex

Table S1a. Odds ratios and 95% confidence intervals for emergency department (ED) visits among females for same-day heat index (HI) above versus below the threshold from single-day lag models in Anchorage, Fairbanks, and the Matanuska-Susitna Valley, Alaska, 2015-2019

| <i>Reason for ED visit</i> | <i>Number of cases</i> | <b>70-degree HI threshold</b>     | <b>72-degree HI threshold</b>   | <b>74-degree HI threshold</b>   | <b>76-degree HI threshold</b>    | <b>78-degree HI threshold</b>     | <b>80-degree HI threshold</b>     | <b>82-degree HI threshold</b>     | <b>84-degree HI threshold</b>     | <b>86-degree HI threshold</b>     |
|----------------------------|------------------------|-----------------------------------|---------------------------------|---------------------------------|----------------------------------|-----------------------------------|-----------------------------------|-----------------------------------|-----------------------------------|-----------------------------------|
| Asthma                     | 1651                   | 1.02 (0.91, 1.13)                 | 1.02 (0.91, 1.15)               | 1.01 (0.89, 1.15)               | 1.00 (0.87, 1.16)                | 1.06 (0.90, 1.26)                 | 1.13 (0.91, 1.41)                 | 1.08 (0.79, 1.47)                 | 0.82 (0.47, 1.43)                 | 0.56 (0.07, 4.19) <sup>b</sup>    |
| COPD                       | 1138                   | 0.98 (0.86, 1.11)                 | 1.01 (0.88, 1.16)               | 0.99 (0.85, 1.15)               | 1.03 (0.87, 1.23)                | 1.01 (0.82, 1.25)                 | 0.89 (0.66, 1.19)                 | 0.82 (0.53, 1.26)                 | 1.18 (0.61, 2.29)                 | 1.52 (0.35, 6.66)                 |
| Pneumonia                  | 999                    | 0.98 (0.85, 1.13)                 | 0.97 (0.84, 1.13)               | 0.90 (0.76, 1.07)               | 1.01 (0.84, 1.22)                | 1.18 (0.95, 1.47)                 | 1.32 (0.98, 1.77)                 | 1.54 (1.04, 2.27) <sup>a</sup>    | 1.67 (0.88, 3.18)                 | 2.56 (0.74, 8.87)                 |
| Bronchitis                 | 1130                   | 0.77 (0.68, 0.88) <sup>a</sup>    | 0.83 (0.72, 0.96) <sup>a</sup>  | 0.80 (0.68, 0.94) <sup>a</sup>  | 0.74 (0.61, 0.89) <sup>a</sup>   | 0.67 (0.52, 0.86) <sup>a</sup>    | 0.72 (0.52, 0.99) <sup>a</sup>    | 0.59 (0.36, 0.98) <sup>a</sup>    | 1.12 (0.58, 2.17)                 | 1.62 (0.57, 4.60)                 |
| Arrhythmia                 | 676                    | 0.93 (0.79, 1.11)                 | 0.92 (0.76, 1.11)               | 0.95 (0.77, 1.16)               | 0.92 (0.73, 1.17)                | 1.08 (0.82, 1.41)                 | 0.96 (0.66, 1.41)                 | 0.93 (0.54, 1.60)                 | 1.13 (0.48, 2.64)                 |                                   |
| Cerebrovascular            | 207                    | 1.14 (0.83, 1.56)                 | 1.08 (0.77, 1.52)               | 1.39 (0.98, 1.99)               | 1.61 (1.08, 2.40) <sup>a</sup>   | 1.26 (0.77, 2.08)                 | 1.13 (0.56, 2.28)                 | 1.97 (0.89, 4.39)                 | 1.81 (0.54, 6.14)                 | 2.95 (0.34, 25.80) <sup>b</sup>   |
| Ischemic                   | 62                     | 0.92 (0.52, 1.63)                 | 1.30 (0.72, 2.34)               | 1.54 (0.83, 2.84)               | 1.58 (0.80, 3.12)                | 2.59 (1.26, 5.31) <sup>a</sup>    | 2.86 (1.01, 8.10) <sup>a</sup>    | 4.79 (1.35, 16.95) <sup>a</sup>   | 1.87 (0.20, 17.96) <sup>b</sup>   | 11.98 (0.72, 198.43) <sup>b</sup> |
| Myocardial infarction      | 21                     | 1.19 (0.46, 3.09)                 | 2.34 (0.87, 6.31)               | 2.79 (0.99, 7.80)               | 3.88 (1.33, 11.33) <sup>a</sup>  | 7.65 (2.46, 23.80) <sup>a</sup>   | 21.05 (2.13, 208.24) <sup>a</sup> | 11.23 (0.65, 194.55) <sup>b</sup> |                                   |                                   |
| Heart failure              | 162                    | 1.00 (0.71, 1.41)                 | 1.03 (0.72, 1.47)               | 1.18 (0.80, 1.73)               | 1.12 (0.72, 1.75)                | 0.99 (0.58, 1.70)                 | 0.99 (0.51, 1.96)                 | 0.81 (0.28, 2.40)                 | 1.12 (0.25, 5.04)                 |                                   |
| Heat illness               | 14                     | 19.46 (2.20, 171.90) <sup>a</sup> | 7.06 (1.48, 33.78) <sup>a</sup> | 9.15 (1.91, 43.70) <sup>a</sup> | 17.13 (3.48, 84.25) <sup>a</sup> | 23.27 (4.47, 121.15) <sup>a</sup> |                                   | 62.78 (4.66, 846.26) <sup>a</sup> | 20.38 (1.99, 208.51) <sup>a</sup> |                                   |

<sup>a</sup>95% CI does not include the null.

<sup>b</sup>This footnote is to designate that only one ED visit related to the indicated health outcome occurred on an exposed day (i.e., a day during which the HI exceeded the indicated threshold) during the study period.

Note: Conditional logistic regression models adjusted for daily PM<sub>2.5</sub> concentration were used to estimate odds ratios. Abbreviations: COPD, chronic obstructive pulmonary disease.

Table S1b. Odds ratios and 95% confidence intervals for emergency department (ED) visits among females for heat index (HI) on lag day 1 above versus below the threshold from single-day lag models in Anchorage, Fairbanks, and the Matanuska-Susitna Valley, Alaska, 2015-2019

| <i>Reason for ED visit</i> | <i>Number of cases</i> | <b>70-degree HI threshold</b>     | <b>72-degree HI threshold</b>   | <b>74-degree HI threshold</b>   | <b>76-degree HI threshold</b>     | <b>78-degree HI threshold</b>     | <b>80-degree HI threshold</b>  | <b>82-degree HI threshold</b>   | <b>84-degree HI threshold</b>    | <b>86-degree HI threshold</b>     |
|----------------------------|------------------------|-----------------------------------|---------------------------------|---------------------------------|-----------------------------------|-----------------------------------|--------------------------------|---------------------------------|----------------------------------|-----------------------------------|
| Asthma                     | 1651                   | 1.00 (0.90, 1.12)                 | 1.10 (0.98, 1.23)               | 1.06 (0.93, 1.20)               | 1.01 (0.88, 1.17)                 | 1.13 (0.96, 1.33)                 | 1.27 (1.03, 1.57) <sup>a</sup> | 1.35 (1.02, 1.79) <sup>a</sup>  | 1.35 (0.83, 2.18)                | 0.69 (0.17, 2.91)                 |
| COPD                       | 1138                   | 0.93 (0.82, 1.06)                 | 0.94 (0.82, 1.09)               | 0.99 (0.85, 1.15)               | 0.98 (0.82, 1.17)                 | 0.92 (0.74, 1.14)                 | 0.78 (0.56, 1.07)              | 0.88 (0.58, 1.34)               | 0.98 (0.47, 2.05)                | 2.96 (0.99, 8.88)                 |
| Pneumonia                  | 999                    | 0.87 (0.75, 1.00)                 | 0.84 (0.72, 0.98) <sup>a</sup>  | 0.87 (0.73, 1.03)               | 0.92 (0.76, 1.12)                 | 1.08 (0.86, 1.35)                 | 1.35 (1.01, 1.80) <sup>a</sup> | 1.61 (1.11, 2.33) <sup>a</sup>  | 1.63 (0.92, 2.88)                | 1.68 (0.38, 7.39)                 |
| Bronchitis                 | 1130                   | 0.77 (0.68, 0.89) <sup>a</sup>    | 0.83 (0.71, 0.95) <sup>a</sup>  | 0.78 (0.66, 0.92) <sup>a</sup>  | 0.82 (0.68, 0.99) <sup>a</sup>    | 0.88 (0.71, 1.11)                 | 0.78 (0.57, 1.07)              | 0.74 (0.47, 1.15)               | 1.12 (0.59, 2.10)                | 1.36 (0.41, 4.48)                 |
| Arrhythmia                 | 676                    | 0.99 (0.83, 1.18)                 | 0.99 (0.82, 1.19)               | 0.97 (0.79, 1.19)               | 1.05 (0.83, 1.32)                 | 1.23 (0.94, 1.60)                 | 1.14 (0.79, 1.66)              | 0.83 (0.47, 1.45)               | 1.10 (0.47, 2.60)                | 2.18 (0.48, 9.83)                 |
| Cerebrovascular            | 207                    | 1.10 (0.80, 1.49)                 | 1.05 (0.75, 1.47)               | 1.10 (0.76, 1.58)               | 1.27 (0.85, 1.90)                 | 1.31 (0.81, 2.13)                 | 1.07 (0.51, 2.26)              | 0.90 (0.31, 2.64)               |                                  |                                   |
| Ischemic                   | 62                     | 1.02 (0.58, 1.80)                 | 1.18 (0.65, 2.13)               | 1.65 (0.89, 3.09)               | 2.31 (1.19, 4.46) <sup>a</sup>    | 2.34 (1.11, 4.94) <sup>a</sup>    | 2.99 (1.21, 7.36) <sup>a</sup> | 3.25 (1.07, 9.87) <sup>a</sup>  | 14.30 (3.16, 64.76) <sup>a</sup> | 22.73 (2.06, 251.17) <sup>a</sup> |
| Myocardial infarction      | 21                     | 1.69 (0.68, 4.19)                 | 1.86 (0.72, 4.84)               | 2.42 (0.88, 6.66)               | 3.77 (1.32, 10.74) <sup>a</sup>   | 1.91 (0.47, 7.74)                 | 2.47 (0.39, 15.65)             | 2.04 (0.21, 20.17) <sup>b</sup> | 5.21 (0.45, 59.80) <sup>b</sup>  |                                   |
| Heart failure              | 162                    | 0.93 (0.66, 1.32)                 | 0.92 (0.64, 1.33)               | 0.97 (0.65, 1.44)               | 0.87 (0.55, 1.38)                 | 1.09 (0.64, 1.84)                 | 0.82 (0.38, 1.75)              | 0.70 (0.23, 2.11)               | 0.56 (0.07, 4.49) <sup>b</sup>   | 2.15 (0.25, 18.58) <sup>b</sup>   |
| Heat illness               | 14                     | 17.56 (1.95, 158.07) <sup>a</sup> | 9.35 (1.84, 47.52) <sup>a</sup> | 7.97 (2.01, 31.61) <sup>a</sup> | 19.89 (3.91, 101.05) <sup>a</sup> | 28.40 (5.45, 148.05) <sup>a</sup> |                                | 7.35 (0.98, 55.17)              |                                  |                                   |

<sup>a</sup>95% CI does not include the null.

<sup>b</sup>This footnote is to designate that only one ED visit related to the indicated health outcome occurred one day after an exposure (i.e., a day during which the HI exceeded the indicated threshold) during the study period.

Note: Conditional logistic regression models adjusted for daily PM<sub>2.5</sub> concentration were used to estimate odds ratios. Abbreviations: COPD, chronic obstructive pulmonary disease.

Table S1c. Odds ratios and 95% confidence intervals for emergency department (ED) visits among females for heat index (HI) on lag day 2 above versus below the threshold from single-day lag models in Anchorage, Fairbanks, and the Matanuska-Susitna Valley, Alaska, 2015-2019

| <i>Reason for ED visit</i> | <i>Number of cases</i> | <b>70-degree HI threshold</b>   | <b>72-degree HI threshold</b>   | <b>74-degree HI threshold</b>   | <b>76-degree HI threshold</b>   | <b>78-degree HI threshold</b>    | <b>80-degree HI threshold</b>   | <b>82-degree HI threshold</b> | <b>84-degree HI threshold</b>     | <b>86-degree HI threshold</b>   |
|----------------------------|------------------------|---------------------------------|---------------------------------|---------------------------------|---------------------------------|----------------------------------|---------------------------------|-------------------------------|-----------------------------------|---------------------------------|
| Asthma                     | 1651                   | 1.00 (0.89, 1.11)               | 1.03 (0.92, 1.16)               | 1.01 (0.89, 1.15)               | 1.04 (0.90, 1.20)               | 1.04 (0.88, 1.24)                | 1.12 (0.90, 1.40)               | 1.09 (0.80, 1.50)             | 0.83 (0.46, 1.51)                 | 1.02 (0.24, 4.36)               |
| COPD                       | 1138                   | 0.92 (0.80, 1.05)               | 0.95 (0.83, 1.10)               | 0.93 (0.79, 1.09)               | 0.89 (0.74, 1.07)               | 0.87 (0.70, 1.10)                | 0.74 (0.53, 1.02)               | 0.87 (0.55, 1.38)             | 0.98 (0.45, 2.15)                 |                                 |
| Pneumonia                  | 999                    | 0.86 (0.75, 1.00) <sup>a</sup>  | 0.85 (0.72, 0.99) <sup>a</sup>  | 0.84 (0.70, 1.00) <sup>a</sup>  | 0.97 (0.79, 1.17)               | 1.19 (0.95, 1.49)                | 1.44 (1.08, 1.91) <sup>a</sup>  | 1.30 (0.87, 1.93)             | 1.09 (0.54, 2.19)                 | 0.53 (0.07, 3.97) <sup>b</sup>  |
| Bronchitis                 | 1130                   | 0.78 (0.68, 0.89) <sup>a</sup>  | 0.83 (0.72, 0.96) <sup>a</sup>  | 0.78 (0.66, 0.92) <sup>a</sup>  | 0.83 (0.68, 1.00) <sup>a</sup>  | 0.82 (0.65, 1.03)                | 0.88 (0.65, 1.20)               | 0.85 (0.54, 1.32)             | 0.61 (0.27, 1.40)                 | 1.22 (0.37, 3.99)               |
| Arrhythmia                 | 676                    | 1.00 (0.85, 1.19)               | 0.92 (0.76, 1.11)               | 0.91 (0.74, 1.12)               | 1.04 (0.82, 1.31)               | 0.98 (0.74, 1.30)                | 0.79 (0.52, 1.19)               | 0.79 (0.45, 1.41)             | 0.71 (0.25, 1.98)                 | 0.92 (0.12, 7.06) <sup>b</sup>  |
| Cerebrovascular            | 207                    | 1.12 (0.82, 1.52)               | 1.11 (0.80, 1.54)               | 1.22 (0.85, 1.74)               | 1.29 (0.86, 1.95)               | 1.31 (0.80, 2.15)                | 0.88 (0.41, 1.91)               | 0.44 (0.10, 1.87)             | 0.75 (0.10, 5.70) <sup>b</sup>    | 3.46 (0.38, 31.48) <sup>b</sup> |
| Ischemic                   | 62                     | 1.03 (0.58, 1.82)               | 1.00 (0.54, 1.84)               | 1.21 (0.64, 2.28)               | 1.10 (0.54, 2.24)               | 1.34 (0.59, 3.06)                | 1.81 (0.68, 4.86)               | 0.83 (0.16, 4.34)             | 1.74 (0.20, 15.25) <sup>b</sup>   |                                 |
| Myocardial infarction      | 21                     | 1.65 (0.66, 4.08)               | 1.98 (0.78, 5.02)               | 2.56 (0.99, 6.65)               | 1.16 (0.37, 3.68)               | 1.54 (0.40, 5.88)                | 1.95 (0.38, 10.07)              |                               |                                   |                                 |
| Heart failure              | 162                    | 0.89 (0.63, 1.26)               | 0.95 (0.66, 1.37)               | 0.96 (0.65, 1.44)               | 1.01 (0.64, 1.58)               | 1.11 (0.66, 1.87)                | 0.49 (0.19, 1.27)               | 0.84 (0.29, 2.41)             | 0.75 (0.10, 5.67) <sup>b</sup>    | 3.86 (0.40, 37.17) <sup>b</sup> |
| Heat illness               | 14                     | 6.95 (1.44, 33.46) <sup>a</sup> | 5.63 (1.46, 21.75) <sup>a</sup> | 5.88 (1.69, 20.47) <sup>a</sup> | 8.65 (2.43, 30.75) <sup>a</sup> | 10.46 (3.06, 35.82) <sup>a</sup> | 9.79 (1.91, 50.29) <sup>a</sup> | 4.76 (0.76, 29.72)            | 11.91 (0.67, 211.28) <sup>b</sup> |                                 |

<sup>a</sup>95% CI does not include the null.

<sup>b</sup>This footnote is to designate that only one ED visit related to the indicated health outcome occurred two days after an exposure (i.e., a day during which the HI exceeded the indicated threshold) during the study period.

Note: Conditional logistic regression models adjusted for daily PM<sub>2.5</sub> concentration were used to estimate odds ratios. Abbreviations: COPD, chronic obstructive pulmonary disease.

Table S1d. Odds ratios and 95% confidence intervals for emergency department (ED) visits among females for heat index (HI) on lag day 3 above versus below the threshold from single-day lag models in Anchorage, Fairbanks, and the Matanuska-Susitna Valley, Alaska, 2015-2019

| <i>Reason for ED visit</i> | <i>Number of cases</i> | <b>70-degree HI threshold</b>  | <b>72-degree HI threshold</b>   | <b>74-degree HI threshold</b>  | <b>76-degree HI threshold</b>  | <b>78-degree HI threshold</b>  | <b>80-degree HI threshold</b> | <b>82-degree HI threshold</b>   | <b>84-degree HI threshold</b>    | <b>86-degree HI threshold</b>  |
|----------------------------|------------------------|--------------------------------|---------------------------------|--------------------------------|--------------------------------|--------------------------------|-------------------------------|---------------------------------|----------------------------------|--------------------------------|
| Asthma                     | 1651                   | 0.96 (0.86, 1.07)              | 0.94 (0.84, 1.06)               | 0.98 (0.86, 1.11)              | 1.00 (0.87, 1.16)              | 1.03 (0.86, 1.22)              | 1.02 (0.81, 1.30)             | 1.04 (0.74, 1.44)               | 0.95 (0.54, 1.66)                | 0.47 (0.06, 3.50) <sup>b</sup> |
| COPD                       | 1138                   | 0.92 (0.80, 1.05)              | 0.96 (0.84, 1.11)               | 0.92 (0.79, 1.08)              | 0.95 (0.79, 1.14)              | 0.95 (0.76, 1.18)              | 0.86 (0.62, 1.17)             | 0.80 (0.51, 1.24)               | 0.65 (0.28, 1.51)                |                                |
| Pneumonia                  | 999                    | 0.93 (0.81, 1.08)              | 0.89 (0.76, 1.04)               | 0.85 (0.71, 1.01)              | 0.93 (0.76, 1.14)              | 1.02 (0.81, 1.29)              | 1.23 (0.91, 1.65)             | 1.47 (1.00, 2.16) <sup>a</sup>  | 1.83 (1.06, 3.16) <sup>a</sup>   | 0.46 (0.06, 3.43) <sup>b</sup> |
| Bronchitis                 | 1130                   | 0.75 (0.65, 0.86) <sup>a</sup> | 0.72 (0.62, 0.83) <sup>a</sup>  | 0.74 (0.62, 0.87) <sup>a</sup> | 0.65 (0.52, 0.79) <sup>a</sup> | 0.72 (0.56, 0.92) <sup>a</sup> | 0.84 (0.61, 1.14)             | 0.74 (0.46, 1.21)               | 0.73 (0.32, 1.68)                | 0.55 (0.07, 4.08) <sup>b</sup> |
| Arrhythmia                 | 676                    | 0.96 (0.81, 1.14)              | 0.82 (0.68, 0.99) <sup>a</sup>  | 0.84 (0.68, 1.03)              | 0.85 (0.67, 1.08)              | 0.90 (0.68, 1.20)              | 0.97 (0.67, 1.40)             | 1.28 (0.77, 2.10)               | 1.25 (0.59, 2.66)                | 0.64 (0.09, 4.82) <sup>b</sup> |
| Cerebrovascular            | 207                    | 1.02 (0.75, 1.39)              | 1.07 (0.77, 1.48)               | 1.02 (0.71, 1.47)              | 1.09 (0.71, 1.66)              | 0.83 (0.48, 1.43)              | 0.80 (0.38, 1.68)             | 0.56 (0.17, 1.90)               |                                  |                                |
| Ischemic                   | 62                     | 1.22 (0.69, 2.13)              | 1.05 (0.57, 1.91)               | 1.13 (0.59, 2.15)              | 1.12 (0.54, 2.31)              | 1.46 (0.65, 3.27)              | 2.21 (0.88, 5.60)             | 4.13 (1.35, 12.64) <sup>a</sup> | 12.03 (2.63, 55.10) <sup>a</sup> |                                |
| Myocardial infarction      | 21                     | 1.97 (0.77, 5.03)              | 1.94 (0.72, 5.25)               | 1.83 (0.66, 5.08)              | 1.52 (0.49, 4.68)              | 2.07 (0.58, 7.36)              | 4.17 (0.99, 17.50)            | 8.92 (1.19, 66.64) <sup>a</sup> | 13.11 (0.81, 213.43)             |                                |
| Heart failure              | 162                    | 0.84 (0.59, 1.19)              | 1.03 (0.71, 1.48)               | 0.98 (0.65, 1.47)              | 1.21 (0.78, 1.87)              | 1.21 (0.72, 2.02)              | 0.79 (0.38, 1.68)             | 1.60 (0.69, 3.73)               | 2.97 (0.96, 9.25)                |                                |
| Heat illness               | 14                     | 2.89 (0.86, 9.76)              | 4.19 (1.21, 14.46) <sup>a</sup> | 3.00 (0.92, 9.79)              | 2.69 (0.77, 9.40)              | 3.65 (0.97, 13.76)             | 2.08 (0.39, 10.96)            | 1.34 (0.14, 12.53) <sup>b</sup> |                                  |                                |

<sup>a</sup>95% CI does not include the null.

<sup>b</sup>This footnote is to designate that only one ED visit related to the indicated health outcome occurred three days after an exposure (i.e., a day during which the HI exceeded the indicated threshold) during the study period.

Note: Conditional logistic regression models adjusted for daily PM<sub>2.5</sub> concentration were used to estimate odds ratios. Abbreviations: COPD, chronic obstructive pulmonary disease.

Table S1e. Odds ratios and 95% confidence intervals for emergency department (ED) visits among females for heat index (HI) on lag day 4 above versus below the threshold from single-day lag models in Anchorage, Fairbanks, and the Matanuska-Susitna Valley, Alaska, 2015-2019

| <i>Reason for ED visit</i> | <i>Number of cases</i> | <b>70-degree HI threshold</b>  | <b>72-degree HI threshold</b>  | <b>74-degree HI threshold</b>  | <b>76-degree HI threshold</b>   | <b>78-degree HI threshold</b>   | <b>80-degree HI threshold</b>   | <b>82-degree HI threshold</b>     | <b>84-degree HI threshold</b>   | <b>86-degree HI threshold</b>  |
|----------------------------|------------------------|--------------------------------|--------------------------------|--------------------------------|---------------------------------|---------------------------------|---------------------------------|-----------------------------------|---------------------------------|--------------------------------|
| Asthma                     | 1651                   | 0.88 (0.79, 0.98) <sup>a</sup> | 0.88 (0.78, 0.99) <sup>a</sup> | 0.93 (0.82, 1.06)              | 0.96 (0.82, 1.11)               | 1.03 (0.86, 1.22)               | 0.99 (0.78, 1.27)               | 0.92 (0.65, 1.31)                 | 0.79 (0.40, 1.58)               |                                |
| COPD                       | 1138                   | 0.91 (0.80, 1.04)              | 0.90 (0.78, 1.03)              | 0.92 (0.78, 1.07)              | 0.95 (0.79, 1.13)               | 0.89 (0.71, 1.11)               | 1.01 (0.75, 1.36)               | 0.81 (0.52, 1.27)                 | 0.92 (0.44, 1.93)               | 1.10 (0.26, 4.70)              |
| Pneumonia                  | 999                    | 0.92 (0.80, 1.06)              | 0.96 (0.82, 1.12)              | 0.90 (0.76, 1.07)              | 0.91 (0.74, 1.11)               | 0.97 (0.76, 1.23)               | 1.12 (0.83, 1.53)               | 1.27 (0.86, 1.87)                 | 1.35 (0.71, 2.54)               | 0.68 (0.09, 5.10) <sup>b</sup> |
| Bronchitis                 | 1130                   | 0.73 (0.63, 0.83) <sup>a</sup> | 0.73 (0.63, 0.85) <sup>a</sup> | 0.72 (0.61, 0.85) <sup>a</sup> | 0.71 (0.58, 0.87) <sup>a</sup>  | 0.80 (0.63, 1.00)               | 0.70 (0.50, 0.98) <sup>a</sup>  | 0.58 (0.34, 0.99) <sup>a</sup>    | 0.70 (0.28, 1.75)               | 0.50 (0.07, 3.66) <sup>b</sup> |
| Arrhythmia                 | 676                    | 0.92 (0.78, 1.09)              | 0.87 (0.72, 1.05)              | 0.84 (0.68, 1.03)              | 0.92 (0.73, 1.16)               | 0.83 (0.62, 1.12)               | 0.96 (0.66, 1.41)               | 1.28 (0.79, 2.08)                 | 1.95 (0.98, 3.87)               | 2.13 (0.62, 7.29)              |
| Cerebrovascular            | 207                    | 0.86 (0.63, 1.18)              | 0.83 (0.60, 1.17)              | 1.02 (0.72, 1.46)              | 0.94 (0.62, 1.42)               | 0.91 (0.55, 1.49)               | 0.86 (0.45, 1.67)               | 0.79 (0.30, 2.10)                 | 0.77 (0.17, 3.57)               |                                |
| Ischemic                   | 62                     | 1.14 (0.66, 1.99)              | 1.53 (0.86, 2.72)              | 1.91 (1.05, 3.47) <sup>a</sup> | 1.89 (1.00, 3.58) <sup>a</sup>  | 2.13 (1.02, 4.47) <sup>a</sup>  | 2.77 (1.20, 6.43) <sup>a</sup>  | 4.90 (1.64, 14.57) <sup>a</sup>   | 1.20 (0.15, 9.74) <sup>b</sup>  |                                |
| Myocardial infarction      | 21                     | 1.49 (0.59, 3.80)              | 2.21 (0.85, 5.78)              | 2.56 (0.94, 6.92)              | 3.87 (1.38, 10.86) <sup>a</sup> | 3.60 (1.17, 11.08) <sup>a</sup> | 5.39 (1.47, 19.71) <sup>a</sup> | 41.88 (2.50, 701.16) <sup>a</sup> |                                 |                                |
| Heart failure              | 162                    | 1.12 (0.80, 1.58)              | 1.00 (0.70, 1.44)              | 1.02 (0.68, 1.51)              | 1.04 (0.67, 1.62)               | 0.99 (0.58, 1.68)               | 1.23 (0.66, 2.31)               | 0.83 (0.33, 2.13)                 | 1.30 (0.29, 5.77)               | 3.76 (0.71, 19.81)             |
| Heat illness               | 14                     | 2.95 (0.87, 9.97)              | 0.87 (0.26, 2.85)              | 1.27 (0.37, 4.35)              | 1.35 (0.36, 5.01)               | 2.82 (0.72, 11.03)              | 4.07 (1.01, 16.36) <sup>a</sup> | 6.02 (1.05, 34.47) <sup>a</sup>   | 4.25 (0.36, 49.71) <sup>b</sup> |                                |

<sup>a</sup>95% CI does not include the null.

<sup>b</sup>This footnote is to designate that only one ED visit related to the indicated health outcome occurred four days after an exposure (i.e., a day during which the HI exceeded the indicated threshold) during the study period.

Note: Conditional logistic regression models adjusted for daily PM<sub>2.5</sub> concentration were used to estimate odds ratios. Abbreviations: COPD, chronic obstructive pulmonary disease.

Table S1f. Odds ratios and 95% confidence intervals for emergency department (ED) visits among females for heat index (HI) on lag day 5 above versus below the threshold from single-day lag models in Anchorage, Fairbanks, and the Matanuska-Susitna Valley, Alaska, 2015-2019

| <i>Reason for ED visit</i> | <i>Number of cases</i> | <b>70-degree HI threshold</b>  | <b>72-degree HI threshold</b>  | <b>74-degree HI threshold</b>  | <b>76-degree HI threshold</b>  | <b>78-degree HI threshold</b>  | <b>80-degree HI threshold</b>    | <b>82-degree HI threshold</b>    | <b>84-degree HI threshold</b>   | <b>86-degree HI threshold</b>   |
|----------------------------|------------------------|--------------------------------|--------------------------------|--------------------------------|--------------------------------|--------------------------------|----------------------------------|----------------------------------|---------------------------------|---------------------------------|
| Asthma                     | 1651                   | 0.90 (0.80, 1.00) <sup>a</sup> | 0.87 (0.77, 0.98) <sup>a</sup> | 0.95 (0.84, 1.08)              | 0.94 (0.81, 1.10)              | 0.93 (0.78, 1.12)              | 0.89 (0.69, 1.14)                | 1.01 (0.71, 1.42)                | 0.81 (0.42, 1.57)               |                                 |
| COPD                       | 1138                   | 0.95 (0.83, 1.08)              | 0.91 (0.79, 1.04)              | 0.90 (0.77, 1.06)              | 0.88 (0.73, 1.05)              | 0.84 (0.67, 1.05)              | 0.87 (0.64, 1.18)                | 0.71 (0.45, 1.13)                | 0.38 (0.14, 1.03)               | 0.71 (0.09, 5.32) <sup>b</sup>  |
| Pneumonia                  | 999                    | 1.02 (0.88, 1.18)              | 0.94 (0.80, 1.09)              | 0.92 (0.78, 1.10)              | 0.93 (0.76, 1.14)              | 0.95 (0.75, 1.21)              | 0.90 (0.64, 1.25)                | 0.90 (0.57, 1.41)                | 1.02 (0.48, 2.13)               |                                 |
| Bronchitis                 | 1130                   | 0.78 (0.68, 0.89) <sup>a</sup> | 0.77 (0.66, 0.89) <sup>a</sup> | 0.74 (0.63, 0.88) <sup>a</sup> | 0.77 (0.64, 0.93) <sup>a</sup> | 0.77 (0.61, 0.97) <sup>a</sup> | 0.68 (0.49, 0.96) <sup>a</sup>   | 1.06 (0.69, 1.63)                | 1.38 (0.68, 2.78)               | 3.77 (1.24, 11.51) <sup>a</sup> |
| Arrhythmia                 | 676                    | 0.92 (0.77, 1.09)              | 0.96 (0.80, 1.16)              | 1.02 (0.83, 1.24)              | 0.98 (0.78, 1.23)              | 1.14 (0.88, 1.49)              | 1.30 (0.92, 1.83)                | 1.36 (0.85, 2.17)                | 0.89 (0.35, 2.25)               | 1.12 (0.14, 8.71) <sup>b</sup>  |
| Cerebrovascular            | 207                    | 0.95 (0.70, 1.30)              | 0.98 (0.71, 1.37)              | 1.02 (0.71, 1.45)              | 0.99 (0.66, 1.49)              | 0.96 (0.58, 1.59)              | 1.03 (0.55, 1.94)                | 1.53 (0.69, 3.37)                | 1.46 (0.43, 4.98)               |                                 |
| Ischemic                   | 62                     | 1.25 (0.72, 2.18)              | 1.55 (0.88, 2.73)              | 2.01 (1.12, 3.59) <sup>a</sup> | 2.11 (1.09, 4.06) <sup>a</sup> | 2.03 (0.95, 4.36)              | 4.71 (2.09, 10.59) <sup>a</sup>  | 1.25 (0.28, 5.63)                | 1.10 (0.14, 8.84) <sup>b</sup>  |                                 |
| Myocardial infarction      | 21                     | 1.88 (0.73, 4.82)              | 2.82 (1.12, 7.09) <sup>a</sup> | 3.64 (1.42, 9.36) <sup>a</sup> | 3.14 (1.12, 8.82) <sup>a</sup> | 3.32 (0.89, 12.30)             | 13.88 (2.42, 79.47) <sup>a</sup> |                                  |                                 |                                 |
| Heart failure              | 162                    | 1.26 (0.90, 1.76)              | 1.20 (0.84, 1.70)              | 1.12 (0.76, 1.64)              | 0.83 (0.52, 1.32)              | 0.92 (0.53, 1.60)              | 1.04 (0.50, 2.16)                | 0.96 (0.31, 2.93)                | 0.49 (0.06, 4.10) <sup>b</sup>  |                                 |
| Heat illness               | 14                     | 1.39 (0.46, 4.22)              | 1.36 (0.45, 4.06)              | 2.03 (0.66, 6.24)              | 2.01 (0.60, 6.75)              | 2.31 (0.62, 8.58)              | 6.04 (1.24, 29.47) <sup>a</sup>  | 10.26 (1.16, 90.38) <sup>a</sup> | 5.91 (0.47, 74.17) <sup>b</sup> |                                 |

<sup>a</sup>95% CI does not include the null.

<sup>b</sup>This footnote is to designate that only one ED visit related to the indicated health outcome occurred five days after an exposure (i.e., a day during which the HI exceeded the indicated threshold) during the study period.

Note: Conditional logistic regression models adjusted for daily PM<sub>2.5</sub> concentration were used to estimate odds ratios. Abbreviations: COPD, chronic obstructive pulmonary disease.

Table S1g. Odds ratios and 95% confidence intervals for emergency department (ED) visits among males for same-day heat index (HI) above versus below the threshold from single-day lag models in Anchorage, Fairbanks, and the Matanuska-Susitna Valley, Alaska, 2015-2019

| <i>Reason for ED visit</i> | <i>Number of cases</i> | <b>70-degree HI threshold</b>    | <b>72-degree HI threshold</b>    | <b>74-degree HI threshold</b>    | <b>76-degree HI threshold</b>    | <b>78-degree HI threshold</b>    | <b>80-degree HI threshold</b>    | <b>82-degree HI threshold</b>    | <b>84-degree HI threshold</b>    | <b>86-degree HI threshold</b>     |
|----------------------------|------------------------|----------------------------------|----------------------------------|----------------------------------|----------------------------------|----------------------------------|----------------------------------|----------------------------------|----------------------------------|-----------------------------------|
| Asthma                     | 1260                   | 0.98 (0.87, 1.11)                | 1.00 (0.87, 1.14)                | 1.00 (0.86, 1.15)                | 1.01 (0.86, 1.19)                | 0.97 (0.80, 1.18)                | 1.00 (0.78, 1.30)                | 1.11 (0.80, 1.55)                | 1.19 (0.68, 2.09)                | 1.66 (0.37, 7.47)                 |
| COPD                       | 1010                   | 0.91 (0.79, 1.05)                | 0.95 (0.81, 1.10)                | 0.95 (0.80, 1.12)                | 0.92 (0.75, 1.11)                | 0.99 (0.79, 1.25)                | 0.78 (0.54, 1.11)                | 0.56 (0.32, 0.98) <sup>a</sup>   | 0.38 (0.12, 1.22)                | 0.56 (0.08, 4.15) <sup>b</sup>    |
| Pneumonia                  | 1082                   | 0.88 (0.77, 1.01)                | 0.94 (0.82, 1.09)                | 0.95 (0.81, 1.12)                | 0.89 (0.73, 1.08)                | 0.96 (0.76, 1.20)                | 1.17 (0.87, 1.58)                | 0.95 (0.61, 1.49)                | 1.14 (0.57, 2.29)                | 1.07 (0.25, 4.52)                 |
| Bronchitis                 | 842                    | 0.75 (0.64, 0.88) <sup>a</sup>   | 0.81 (0.68, 0.95) <sup>a</sup>   | 0.79 (0.66, 0.96) <sup>a</sup>   | 0.77 (0.62, 0.97) <sup>a</sup>   | 0.80 (0.61, 1.04)                | 0.96 (0.68, 1.34)                | 0.89 (0.55, 1.45)                | 1.04 (0.47, 2.29)                | 1.34 (0.31, 5.78)                 |
| Arrhythmia                 | 941                    | 0.97 (0.84, 1.13)                | 0.99 (0.85, 1.16)                | 0.99 (0.84, 1.18)                | 0.90 (0.74, 1.10)                | 0.78 (0.61, 1.00)                | 0.69 (0.49, 0.98) <sup>a</sup>   | 0.67 (0.40, 1.11)                | 0.46 (0.17, 1.26)                | 1.28 (0.30, 5.52)                 |
| Cerebrovascular            | 227                    | 0.82 (0.61, 1.11)                | 0.75 (0.54, 1.04)                | 0.78 (0.54, 1.13)                | 0.77 (0.50, 1.18)                | 0.98 (0.61, 1.57)                | 1.08 (0.59, 2.00)                | 1.08 (0.46, 2.54)                | 1.60 (0.53, 4.80)                | 1.61 (0.20, 12.99) <sup>b</sup>   |
| Ischemic                   | 138                    | 1.27 (0.87, 1.86)                | 1.28 (0.86, 1.91)                | 1.28 (0.83, 1.97)                | 1.30 (0.79, 2.12)                | 1.04 (0.56, 1.93)                | 1.52 (0.67, 3.45)                | 1.11 (0.32, 3.81)                |                                  |                                   |
| Myocardial infarction      | 61                     | 1.67 (0.94, 2.95)                | 1.39 (0.76, 2.55)                | 1.67 (0.88, 3.15)                | 1.65 (0.80, 3.41)                | 0.85 (0.28, 2.56)                | 0.83 (0.17, 4.06)                |                                  |                                  |                                   |
| Heart failure              | 279                    | 0.72 (0.54, 0.95) <sup>a</sup>   | 0.65 (0.48, 0.90) <sup>a</sup>   | 0.67 (0.47, 0.96) <sup>a</sup>   | 0.79 (0.53, 1.16)                | 0.75 (0.46, 1.22)                | 0.76 (0.38, 1.49)                | 0.57 (0.20, 1.64)                | 1.48 (0.33, 6.57)                | 11.70 (0.73, 187.14) <sup>b</sup> |
| Heat illness               | 21                     | 11.48 (2.64, 50.04) <sup>a</sup> | 17.56 (4.00, 77.00) <sup>a</sup> | 14.28 (4.01, 50.82) <sup>a</sup> | 16.84 (5.36, 52.86) <sup>a</sup> | 14.21 (4.76, 42.47) <sup>a</sup> | 27.05 (7.48, 97.89) <sup>a</sup> | 16.44 (4.93, 54.87) <sup>a</sup> | 10.41 (2.93, 36.96) <sup>a</sup> |                                   |

<sup>a</sup>95% CI does not include the null.

<sup>b</sup>This footnote is to designate that only one ED visit related to the indicated health outcome occurred on an exposed day (i.e., a day during which the HI exceeded the indicated threshold) during the study period.

Note: Conditional logistic regression models adjusted for daily PM<sub>2.5</sub> concentration were used to estimate odds ratios. Abbreviations: COPD, chronic obstructive pulmonary disease.

Table S1h. Odds ratios and 95% confidence intervals for emergency department (ED) visits among males for heat index (HI) on lag day 1 above versus below the threshold from single-day lag models in Anchorage, Fairbanks, and the Matanuska-Susitna Valley, Alaska, 2015-2019

| <i>Reason for ED visit</i> | <i>Number of cases</i> | <b>70-degree HI threshold</b>    | <b>72-degree HI threshold</b>   | <b>74-degree HI threshold</b>   | <b>76-degree HI threshold</b>    | <b>78-degree HI threshold</b>   | <b>80-degree HI threshold</b>   | <b>82-degree HI threshold</b>    | <b>84-degree HI threshold</b>    | <b>86-degree HI threshold</b>   |
|----------------------------|------------------------|----------------------------------|---------------------------------|---------------------------------|----------------------------------|---------------------------------|---------------------------------|----------------------------------|----------------------------------|---------------------------------|
| Asthma                     | 1260                   | 0.99 (0.88, 1.13)                | 1.01 (0.88, 1.15)               | 1.04 (0.90, 1.19)               | 1.09 (0.93, 1.28)                | 1.05 (0.87, 1.28)               | 1.07 (0.84, 1.38)               | 1.07 (0.75, 1.52)                | 0.80 (0.42, 1.55)                | 0.93 (0.22, 3.95)               |
| COPD                       | 1010                   | 0.93 (0.81, 1.07)                | 0.94 (0.81, 1.09)               | 0.89 (0.75, 1.05)               | 0.94 (0.78, 1.14)                | 0.77 (0.60, 0.99) <sup>a</sup>  | 0.58 (0.39, 0.84) <sup>a</sup>  | 0.54 (0.31, 0.93) <sup>a</sup>   | 0.57 (0.23, 1.42)                |                                 |
| Pneumonia                  | 1082                   | 0.94 (0.82, 1.08)                | 0.97 (0.84, 1.12)               | 0.96 (0.81, 1.13)               | 1.02 (0.84, 1.22)                | 1.12 (0.90, 1.39)               | 1.16 (0.86, 1.57)               | 1.23 (0.82, 1.86)                | 1.34 (0.69, 2.61)                |                                 |
| Bronchitis                 | 842                    | 0.79 (0.68, 0.93) <sup>a</sup>   | 0.81 (0.68, 0.96) <sup>a</sup>  | 0.83 (0.69, 1.00)               | 0.69 (0.55, 0.87) <sup>a</sup>   | 0.68 (0.51, 0.90) <sup>a</sup>  | 0.81 (0.56, 1.18)               | 0.92 (0.56, 1.51)                | 0.82 (0.35, 1.90)                | 0.47 (0.06, 3.47) <sup>b</sup>  |
| Arrhythmia                 | 941                    | 1.04 (0.90, 1.20)                | 1.05 (0.90, 1.22)               | 0.98 (0.83, 1.16)               | 0.87 (0.71, 1.06)                | 0.96 (0.75, 1.21)               | 0.71 (0.49, 1.02)               | 0.83 (0.51, 1.35)                | 1.08 (0.49, 2.37)                | 2.46 (0.54, 11.25)              |
| Cerebrovascular            | 227                    | 0.85 (0.63, 1.15)                | 0.78 (0.56, 1.08)               | 0.76 (0.52, 1.09)               | 0.91 (0.61, 1.36)                | 1.08 (0.68, 1.72)               | 1.03 (0.56, 1.88)               | 0.56 (0.20, 1.58)                | 0.33 (0.04, 2.43) <sup>b</sup>   |                                 |
| Ischemic                   | 138                    | 1.35 (0.93, 1.97)                | 1.47 (0.99, 2.18)               | 1.46 (0.96, 2.22)               | 1.08 (0.64, 1.81)                | 0.82 (0.41, 1.63)               | 0.95 (0.39, 2.35)               | 0.68 (0.15, 3.02)                |                                  |                                 |
| Myocardial infarction      | 61                     | 1.86 (1.05, 3.28) <sup>a</sup>   | 1.90 (1.03, 3.51) <sup>a</sup>  | 1.94 (1.01, 3.71) <sup>a</sup>  | 1.31 (0.60, 2.88)                | 0.70 (0.20, 2.44)               | 1.15 (0.23, 5.88)               | 1.78 (0.31, 10.02)               |                                  |                                 |
| Heart failure              | 279                    | 1.86 (1.05, 3.28) <sup>a</sup>   | 0.76 (0.56, 1.02)               | 0.83 (0.60, 1.15)               | 0.84 (0.58, 1.22)                | 0.94 (0.59, 1.48)               | 0.84 (0.43, 1.63)               | 1.50 (0.65, 3.46)                | 0.37 (0.04, 3.12) <sup>b</sup>   | 1.88 (0.22, 15.88) <sup>b</sup> |
| Heat illness               | 21                     | 11.98 (2.76, 51.94) <sup>a</sup> | 7.60 (2.51, 23.06) <sup>a</sup> | 7.76 (2.78, 21.62) <sup>a</sup> | 11.12 (4.13, 29.90) <sup>a</sup> | 9.34 (3.56, 24.46) <sup>a</sup> | 9.99 (3.51, 28.45) <sup>a</sup> | 13.44 (3.57, 50.65) <sup>a</sup> | 12.01 (1.69, 85.27) <sup>a</sup> |                                 |

<sup>a</sup>95% CI does not include the null.

<sup>b</sup>This footnote is to designate that only one ED visit related to the indicated health outcome occurred one day after an exposure (i.e., a day during which the HI exceeded the indicated threshold) during the study period.

Note: Conditional logistic regression models adjusted for daily PM<sub>2.5</sub> concentration were used to estimate odds ratios. Abbreviations: COPD, chronic obstructive pulmonary disease.



Table S1i. Odds ratios and 95% confidence intervals for emergency department (ED) visits among males for heat index (HI) on lag day 2 above versus below the threshold from single-day lag models in Anchorage, Fairbanks, and the Matanuska-Susitna Valley, Alaska, 2015-2019

| <i>Reason for ED visit</i> | <i>Number of cases</i> | <b>70-degree HI threshold</b>   | <b>72-degree HI threshold</b>  | <b>74-degree HI threshold</b>  | <b>76-degree HI threshold</b>  | <b>78-degree HI threshold</b>   | <b>80-degree HI threshold</b>   | <b>82-degree HI threshold</b>   | <b>84-degree HI threshold</b>    | <b>86-degree HI threshold</b>  |
|----------------------------|------------------------|---------------------------------|--------------------------------|--------------------------------|--------------------------------|---------------------------------|---------------------------------|---------------------------------|----------------------------------|--------------------------------|
| Asthma                     | 1260                   | 0.96 (0.85, 1.09)               | 1.01 (0.89, 1.15)              | 0.95 (0.82, 1.09)              | 1.06 (0.91, 1.25)              | 1.03 (0.84, 1.25)               | 1.06 (0.82, 1.37)               | 1.11 (0.78, 1.57)               | 1.01 (0.55, 1.84)                | 0.48 (0.07, 3.59) <sup>b</sup> |
| COPD                       | 1010                   | 0.83 (0.72, 0.96) <sup>a</sup>  | 0.84 (0.72, 0.97) <sup>a</sup> | 0.81 (0.68, 0.96) <sup>a</sup> | 0.81 (0.66, 0.99) <sup>a</sup> | 0.70 (0.54, 0.91) <sup>a</sup>  | 0.79 (0.56, 1.11)               | 0.78 (0.48, 1.26)               | 0.54 (0.22, 1.33)                | 1.07 (0.25, 4.53)              |
| Pneumonia                  | 1082                   | 0.95 (0.83, 1.09)               | 0.93 (0.80, 1.08)              | 0.96 (0.81, 1.13)              | 1.03 (0.86, 1.24)              | 1.11 (0.89, 1.39)               | 1.13 (0.83, 1.54)               | 1.19 (0.77, 1.84)               | 0.82 (0.36, 1.91)                | 1.61 (0.48, 5.35)              |
| Bronchitis                 | 842                    | 0.79 (0.68, 0.93) <sup>a</sup>  | 0.87 (0.73, 1.03)              | 0.77 (0.64, 0.94) <sup>a</sup> | 0.75 (0.60, 0.94) <sup>a</sup> | 0.79 (0.60, 1.04)               | 0.84 (0.58, 1.21)               | 0.69 (0.38, 1.23)               | 0.44 (0.14, 1.41)                | 0.51 (0.07, 3.80) <sup>b</sup> |
| Arrhythmia                 | 941                    | 1.08 (0.94, 1.25)               | 1.08 (0.93, 1.25)              | 1.03 (0.87, 1.22)              | 0.91 (0.75, 1.11)              | 0.93 (0.74, 1.18)               | 0.92 (0.67, 1.28)               | 0.90 (0.57, 1.43)               | 0.87 (0.40, 1.89)                | 1.15 (0.27, 4.89)              |
| Cerebrovascular            | 227                    | 0.93 (0.69, 1.26)               | 0.87 (0.64, 1.20)              | 0.93 (0.66, 1.31)              | 0.84 (0.57, 1.26)              | 0.69 (0.41, 1.15)               | 0.75 (0.39, 1.44)               | 0.54 (0.19, 1.53)               | 0.79 (0.19, 3.39)                |                                |
| Ischemic                   | 138                    | 1.63 (1.12, 2.37) <sup>a</sup>  | 1.75 (1.20, 2.56) <sup>a</sup> | 1.35 (0.89, 2.05)              | 1.31 (0.81, 2.13)              | 0.91 (0.48, 1.73)               | 0.73 (0.28, 1.92)               | 1.07 (0.31, 3.69)               |                                  |                                |
| Myocardial infarction      | 61                     | 2.15 (1.22, 3.79) <sup>a</sup>  | 2.17 (1.21, 3.92) <sup>a</sup> | 1.93 (1.01, 3.68) <sup>a</sup> | 1.68 (0.78, 3.65)              | 1.05 (0.35, 3.14)               | 1.32 (0.27, 6.46)               | 2.09 (0.41, 10.77)              |                                  |                                |
| Heart failure              | 279                    | 0.81 (0.62, 1.06)               | 0.80 (0.60, 1.07)              | 0.75 (0.54, 1.05)              | 0.85 (0.58, 1.23)              | 0.89 (0.56, 1.41)               | 1.00 (0.53, 1.87)               | 1.08 (0.45, 2.59)               |                                  |                                |
| Heat illness               | 21                     | 5.92 (1.72, 20.35) <sup>a</sup> | 3.66 (1.39, 9.65) <sup>a</sup> | 2.95 (1.21, 7.23) <sup>a</sup> | 3.61 (1.45, 8.98) <sup>a</sup> | 5.09 (1.88, 13.78) <sup>a</sup> | 4.29 (1.32, 13.98) <sup>a</sup> | 1.39 (0.11, 17.49) <sup>b</sup> | 8.15 (0.45, 148.89) <sup>b</sup> |                                |

<sup>a</sup>95% CI does not include the null.

<sup>b</sup>This footnote is to designate that only one ED visit related to the indicated health outcome occurred two days after an exposure (i.e., a day during which the HI exceeded the indicated threshold) during the study period.

Note: Conditional logistic regression models adjusted for daily PM<sub>2.5</sub> concentration were used to estimate odds ratios. Abbreviations: COPD, chronic obstructive pulmonary disease.

Table S1j. Odds ratios and 95% confidence intervals for emergency department (ED) visits among males for heat index (HI) on lag day 3 above versus below the threshold from single-day lag models in Anchorage, Fairbanks, and the Matanuska-Susitna Valley, Alaska, 2015-2019

| <i>Reason for ED visit</i> | <i>Number of cases</i> | <b>70-degree HI threshold</b>  | <b>72-degree HI threshold</b>  | <b>74-degree HI threshold</b>   | <b>76-degree HI threshold</b>  | <b>78-degree HI threshold</b>  | <b>80-degree HI threshold</b>  | <b>82-degree HI threshold</b>  | <b>84-degree HI threshold</b>   | <b>86-degree HI threshold</b>   |
|----------------------------|------------------------|--------------------------------|--------------------------------|---------------------------------|--------------------------------|--------------------------------|--------------------------------|--------------------------------|---------------------------------|---------------------------------|
| Asthma                     | 1260                   | 0.94 (0.83, 1.06)              | 0.96 (0.84, 1.09)              | 0.94 (0.82, 1.09)               | 0.96 (0.81, 1.13)              | 0.94 (0.77, 1.14)              | 0.99 (0.76, 1.29)              | 0.81 (0.55, 1.20)              | 0.77 (0.39, 1.53)               | 0.41 (0.06, 3.04) <sup>b</sup>  |
| COPD                       | 1010                   | 0.84 (0.73, 0.97) <sup>a</sup> | 0.88 (0.76, 1.03)              | 0.73 (0.61, 0.87) <sup>a</sup>  | 0.71 (0.57, 0.87) <sup>a</sup> | 0.70 (0.54, 0.91) <sup>a</sup> | 0.67 (0.46, 0.96) <sup>a</sup> | 0.58 (0.33, 1.01)              | 0.59 (0.24, 1.48)               | 1.34 (0.31, 5.80)               |
| Pneumonia                  | 1082                   | 0.91 (0.79, 1.04)              | 0.92 (0.79, 1.06)              | 0.97 (0.83, 1.15)               | 0.91 (0.75, 1.10)              | 0.85 (0.67, 1.08)              | 0.88 (0.63, 1.23)              | 0.98 (0.62, 1.53)              | 0.85 (0.39, 1.87)               |                                 |
| Bronchitis                 | 842                    | 0.80 (0.68, 0.93) <sup>a</sup> | 0.79 (0.67, 0.94) <sup>a</sup> | 0.80 (0.66, 0.97) <sup>a</sup>  | 0.82 (0.66, 1.02)              | 0.83 (0.63, 1.08)              | 0.72 (0.48, 1.06)              | 0.86 (0.51, 1.46)              | 0.69 (0.25, 1.90)               | 0.83 (0.11, 6.30) <sup>b</sup>  |
| Arrhythmia                 | 941                    | 0.90 (0.78, 1.05)              | 0.94 (0.80, 1.10)              | 0.91 (0.77, 1.08)               | 0.90 (0.74, 1.10)              | 0.87 (0.68, 1.11)              | 1.07 (0.80, 1.45)              | 0.99 (0.65, 1.50)              | 0.70 (0.32, 1.54)               | 0.44 (0.06, 3.26) <sup>b</sup>  |
| Cerebrovascular            | 227                    | 0.85 (0.62, 1.15)              | 0.88 (0.64, 1.22)              | 0.79 (0.55, 1.14)               | 0.81 (0.54, 1.23)              | 0.72 (0.43, 1.22)              | 0.78 (0.40, 1.50)              | 0.47 (0.14, 1.56)              |                                 |                                 |
| Ischemic                   | 138                    | 1.16 (0.79, 1.69)              | 1.10 (0.74, 1.64)              | 0.99 (0.63, 1.54)               | 1.25 (0.78, 2.02)              | 1.11 (0.62, 2.02)              | 0.86 (0.38, 1.95)              | 0.53 (0.12, 2.29)              | 0.56 (0.07, 4.23) <sup>b</sup>  |                                 |
| Myocardial infarction      | 61                     | 1.20 (0.65, 2.18)              | 1.36 (0.73, 2.53)              | 1.73 (0.88, 3.38)               | 2.07 (0.98, 4.37)              | 1.29 (0.45, 3.70)              | 1.45 (0.35, 5.95)              | 1.73 (0.29, 10.49)             | 1.13 (0.12, 10.47) <sup>b</sup> |                                 |
| Heart failure              | 279                    | 0.88 (0.67, 1.15)              | 0.78 (0.58, 1.05)              | 0.89 (0.64, 1.23)               | 0.77 (0.52, 1.14)              | 0.64 (0.38, 1.07)              | 0.70 (0.35, 1.41)              | 0.91 (0.36, 2.33)              | 0.86 (0.20, 3.68)               | 1.71 (0.21, 13.90) <sup>b</sup> |
| Heat illness               | 21                     | 3.37 (1.20, 9.45) <sup>a</sup> | 3.09 (1.20, 7.95) <sup>a</sup> | 3.97 (1.52, 10.34) <sup>a</sup> | 1.61 (0.60, 4.28)              | 1.70 (0.51, 5.70)              | 0.50 (0.06, 4.42) <sup>b</sup> | 0.87 (0.10, 7.55) <sup>b</sup> | 4.09 (0.42, 39.67) <sup>b</sup> |                                 |

<sup>a</sup>95% CI does not include the null.

<sup>b</sup>This footnote is to designate that only one ED visit related to the indicated health outcome occurred three days after an exposure (i.e., a day during which the HI exceeded the indicated threshold) during the study period.

Note: Conditional logistic regression models adjusted for daily PM<sub>2.5</sub> concentration were used to estimate odds ratios. Abbreviations: COPD, chronic obstructive pulmonary disease.

Table S1k. Odds ratios and 95% confidence intervals for emergency department (ED) visits among males for heat index (HI) on lag day 4 above versus below the threshold from single-day lag models in Anchorage, Fairbanks, and the Matanuska-Susitna Valley, Alaska, 2015-2019

| <i>Reason for ED visit</i> | <i>Number of cases</i> | <b>70-degree HI threshold</b>  | <b>72-degree HI threshold</b>  | <b>74-degree HI threshold</b>  | <b>76-degree HI threshold</b>  | <b>78-degree HI threshold</b>  | <b>80-degree HI threshold</b>  | <b>82-degree HI threshold</b>  | <b>84-degree HI threshold</b>   | <b>86-degree HI threshold</b>  |
|----------------------------|------------------------|--------------------------------|--------------------------------|--------------------------------|--------------------------------|--------------------------------|--------------------------------|--------------------------------|---------------------------------|--------------------------------|
| Asthma                     | 1260                   | 0.91 (0.80, 1.03)              | 0.92 (0.80, 1.05)              | 0.91 (0.79, 1.06)              | 0.90 (0.76, 1.07)              | 1.03 (0.85, 1.26)              | 1.18 (0.92, 1.51)              | 1.17 (0.83, 1.64)              | 0.80 (0.42, 1.51)               | 0.76 (0.10, 5.78) <sup>b</sup> |
| COPD                       | 1010                   | 0.85 (0.74, 0.98) <sup>a</sup> | 0.86 (0.74, 1.00)              | 0.87 (0.73, 1.03)              | 0.87 (0.72, 1.06)              | 0.74 (0.58, 0.95) <sup>a</sup> | 0.67 (0.47, 0.97) <sup>a</sup> | 0.76 (0.46, 1.26)              | 0.81 (0.37, 1.77)               |                                |
| Pneumonia                  | 1082                   | 0.90 (0.78, 1.03)              | 0.93 (0.81, 1.08)              | 0.87 (0.73, 1.02)              | 0.83 (0.69, 1.02)              | 0.79 (0.62, 1.01)              | 0.71 (0.50, 1.01)              | 0.58 (0.33, 1.02)              | 0.54 (0.20, 1.50)               | 0.65 (0.09, 4.86) <sup>b</sup> |
| Bronchitis                 | 842                    | 0.73 (0.63, 0.86) <sup>a</sup> | 0.75 (0.63, 0.89) <sup>a</sup> | 0.82 (0.68, 1.00) <sup>a</sup> | 0.84 (0.68, 1.05)              | 0.70 (0.53, 0.93) <sup>a</sup> | 0.82 (0.56, 1.19)              | 0.62 (0.34, 1.14)              | 0.36 (0.09, 1.47)               | 0.85 (0.11, 6.46) <sup>b</sup> |
| Arrhythmia                 | 941                    | 0.91 (0.78, 1.05)              | 0.95 (0.82, 1.11)              | 0.90 (0.76, 1.08)              | 0.95 (0.77, 1.16)              | 0.97 (0.76, 1.23)              | 1.17 (0.87, 1.58)              | 1.19 (0.79, 1.80)              | 0.89 (0.41, 1.96)               |                                |
| Cerebrovascular            | 227                    | 1.09 (0.81, 1.47)              | 1.00 (0.73, 1.37)              | 0.90 (0.64, 1.28)              | 0.82 (0.55, 1.25)              | 0.77 (0.45, 1.30)              | 0.67 (0.33, 1.37)              | 0.47 (0.15, 1.55)              | 0.98 (0.23, 4.14)               |                                |
| Ischemic                   | 138                    | 0.86 (0.58, 1.27)              | 0.97 (0.64, 1.46)              | 1.04 (0.66, 1.63)              | 1.11 (0.67, 1.84)              | 0.87 (0.46, 1.65)              | 0.67 (0.28, 1.60)              | 0.44 (0.10, 1.86)              |                                 |                                |
| Myocardial infarction      | 61                     | 1.17 (0.63, 2.17)              | 1.25 (0.65, 2.39)              | 1.79 (0.90, 3.54)              | 2.74 (1.31, 5.72) <sup>a</sup> | 1.68 (0.67, 4.23)              | 1.05 (0.29, 3.76)              | 0.64 (0.08, 5.16) <sup>b</sup> |                                 |                                |
| Heart failure              | 279                    | 0.96 (0.74, 1.26)              | 0.80 (0.59, 1.07)              | 0.85 (0.61, 1.18)              | 0.52 (0.34, 0.82) <sup>a</sup> | 0.71 (0.42, 1.18)              | 0.93 (0.50, 1.76)              | 0.42 (0.13, 1.40)              | 0.46 (0.06, 3.46) <sup>b</sup>  |                                |
| Heat illness               | 21                     | 2.14 (0.84, 5.46)              | 2.12 (0.85, 5.29)              | 2.38 (0.94, 6.01)              | 1.31 (0.48, 3.58)              | 1.08 (0.30, 3.97)              | 1.74 (0.45, 6.76)              | 2.18 (0.44, 10.93)             | 6.04 (1.05, 34.63) <sup>a</sup> |                                |

<sup>a</sup>95% CI does not include the null.

<sup>b</sup>This footnote is to designate that only one ED visit related to the indicated health outcome occurred four days after an exposure (i.e., a day during which the HI exceeded the indicated threshold) during the study period.

Note: Conditional logistic regression models adjusted for daily PM<sub>2.5</sub> concentration were used to estimate odds ratios. Abbreviations: COPD, chronic obstructive pulmonary disease.

Table S11. Odds ratios and 95% confidence intervals for emergency department (ED) visits among males for heat index (HI) on lag day 5 above versus below the threshold from single-day lag models in Anchorage, Fairbanks, and the Matanuska-Susitna Valley, Alaska, 2015-2019

| <i>Reason for ED visit</i> | <i>Number of cases</i> | <b>70-degree HI threshold</b>  | <b>72-degree HI threshold</b>  | <b>74-degree HI threshold</b>  | <b>76-degree HI threshold</b>  | <b>78-degree HI threshold</b>  | <b>80-degree HI threshold</b>   | <b>82-degree HI threshold</b> | <b>84-degree HI threshold</b>   | <b>86-degree HI threshold</b>   |
|----------------------------|------------------------|--------------------------------|--------------------------------|--------------------------------|--------------------------------|--------------------------------|---------------------------------|-------------------------------|---------------------------------|---------------------------------|
| Asthma                     | 1260                   | 0.96 (0.84, 1.08)              | 0.94 (0.82, 1.07)              | 0.94 (0.81, 1.08)              | 0.94 (0.79, 1.11)              | 1.06 (0.87, 1.28)              | 1.07 (0.83, 1.39)               | 1.07 (0.75, 1.52)             | 0.25 (0.08, 0.79) <sup>a</sup>  |                                 |
| COPD                       | 1010                   | 0.85 (0.74, 0.98) <sup>a</sup> | 0.81 (0.70, 0.95) <sup>a</sup> | 0.82 (0.69, 0.97) <sup>a</sup> | 0.74 (0.61, 0.91) <sup>a</sup> | 0.70 (0.55, 0.90) <sup>a</sup> | 0.74 (0.53, 1.04)               | 0.65 (0.39, 1.08)             | 1.15 (0.55, 2.42)               | 3.05 (1.13, 8.23) <sup>a</sup>  |
| Pneumonia                  | 1082                   | 0.85 (0.74, 0.97) <sup>a</sup> | 0.85 (0.74, 0.99) <sup>a</sup> | 0.85 (0.72, 1.00)              | 0.83 (0.68, 1.01)              | 0.83 (0.65, 1.05)              | 0.52 (0.35, 0.76) <sup>a</sup>  | 0.72 (0.43, 1.19)             | 0.63 (0.25, 1.57)               | 1.47 (0.34, 6.39)               |
| Bronchitis                 | 842                    | 0.82 (0.70, 0.96) <sup>a</sup> | 0.84 (0.71, 0.99) <sup>a</sup> | 0.85 (0.71, 1.03)              | 0.82 (0.66, 1.03)              | 0.70 (0.53, 0.94) <sup>a</sup> | 0.76 (0.52, 1.12)               | 0.75 (0.43, 1.31)             | 0.81 (0.32, 2.03)               |                                 |
| Arrhythmia                 | 941                    | 0.92 (0.79, 1.06)              | 0.85 (0.73, 1.00)              | 0.87 (0.73, 1.03)              | 0.93 (0.77, 1.13)              | 0.97 (0.77, 1.22)              | 1.21 (0.91, 1.62)               | 0.89 (0.57, 1.40)             | 0.96 (0.50, 1.84)               | 0.47 (0.06, 3.48) <sup>b</sup>  |
| Cerebrovascular            | 227                    | 1.25 (0.94, 1.66)              | 1.26 (0.94, 1.70)              | 1.14 (0.82, 1.59)              | 1.33 (0.93, 1.92)              | 1.07 (0.67, 1.69)              | 0.84 (0.44, 1.62)               | 1.28 (0.57, 2.89)             | 0.55 (0.07, 4.10) <sup>b</sup>  | 2.53 (0.30, 21.66) <sup>b</sup> |
| Ischemic                   | 138                    | 1.21 (0.83, 1.77)              | 1.06 (0.71, 1.60)              | 0.83 (0.52, 1.35)              | 1.01 (0.60, 1.70)              | 0.83 (0.43, 1.59)              | 0.50 (0.19, 1.31)               | 0.47 (0.10, 2.08)             | 1.20 (0.24, 5.95)               |                                 |
| Myocardial infarction      | 61                     | 1.74 (0.96, 3.14)              | 1.79 (0.96, 3.33)              | 1.86 (0.95, 3.66)              | 2.10 (0.98, 4.47)              | 1.58 (0.61, 4.08)              | 0.68 (0.15, 3.11)               | 0.74 (0.09, 5.95)             | 1.61 (0.18, 14.03) <sup>b</sup> |                                 |
| Heart failure              | 279                    | 0.93 (0.71, 1.21)              | 0.87 (0.64, 1.16)              | 0.76 (0.54, 1.08)              | 0.54 (0.34, 0.84) <sup>a</sup> | 0.67 (0.41, 1.11)              | 0.70 (0.35, 1.38)               | 0.51 (0.15, 1.71)             | 0.74 (0.10, 5.65) <sup>b</sup>  |                                 |
| Heat illness               | 21                     | 2.65 (0.99, 7.12)              | 1.86 (0.75, 4.65)              | 2.18 (0.86, 5.52)              | 2.81 (1.09, 7.24) <sup>a</sup> | 2.93 (1.00, 8.62)              | 3.40 (1.02, 11.36) <sup>a</sup> | 3.81 (0.97, 14.94)            | 0.99 (0.11, 8.52) <sup>b</sup>  |                                 |

<sup>a</sup>95% CI does not include the null.

<sup>b</sup>This footnote is to designate that only one ED visit related to the indicated health outcome occurred five days after an exposure (i.e., a day during which the HI exceeded the indicated threshold) during the study period.

Note: Conditional logistic regression models adjusted for daily PM<sub>2.5</sub> concentration were used to estimate odds ratios. Abbreviations: COPD, chronic obstructive pulmonary disease.

Tables S2a-1 – Threshold analyses at Lags 0-5, stratified by race

Table S2a. Odds ratios and 95% confidence intervals for emergency department (ED) visits among Alaskan Native people for same-day heat index (HI) above versus below the threshold from single-day lag models in Anchorage, Fairbanks, and the Matanuska-Susitna Valley, Alaska, 2015-2019

| <i>Reason for ED visit</i> | <i>Number of cases</i> | <b>70-degree HI threshold</b>     | <b>72-degree HI threshold</b>     | <b>74-degree HI threshold</b>     | <b>76-degree HI threshold</b>     | <b>78-degree HI threshold</b>     | <b>80-degree HI threshold</b>     | <b>82-degree HI threshold</b>   | <b>84-degree HI threshold</b>    | <b>86-degree HI threshold</b>     |
|----------------------------|------------------------|-----------------------------------|-----------------------------------|-----------------------------------|-----------------------------------|-----------------------------------|-----------------------------------|---------------------------------|----------------------------------|-----------------------------------|
| Asthma                     | 920                    | 1.03 (0.89, 1.19)                 | 1.01 (0.87, 1.18)                 | 1.00 (0.85, 1.19)                 | 1.01 (0.84, 1.23)                 | 1.03 (0.82, 1.30)                 | 1.11 (0.81, 1.52)                 | 1.15 (0.76, 1.75)               | 0.96 (0.42, 2.16)                | 3.27 (0.65, 16.36)                |
| COPD                       | 477                    | 0.80 (0.65, 0.98) <sup>a</sup>    | 0.82 (0.65, 1.02)                 | 0.80 (0.62, 1.02)                 | 0.82 (0.62, 1.10)                 | 0.87 (0.62, 1.23)                 | 0.71 (0.43, 1.19)                 | 0.60 (0.27, 1.31)               | 0.61 (0.14, 2.60)                | 2.92 (0.33, 26.13) <sup>b</sup>   |
| Pneumonia                  | 625                    | 0.77 (0.64, 0.93) <sup>a</sup>    | 0.78 (0.63, 0.95) <sup>a</sup>    | 0.81 (0.65, 1.01)                 | 0.90 (0.70, 1.16)                 | 1.07 (0.80, 1.43)                 | 1.64 (1.13, 2.39) <sup>a</sup>    | 1.25 (0.72, 2.17)               | 1.93 (0.85, 4.36)                | 2.03 (0.45, 9.06)                 |
| Bronchitis                 | 597                    | 0.84 (0.70, 1.01)                 | 0.79 (0.64, 0.96) <sup>a</sup>    | 0.79 (0.63, 0.99) <sup>a</sup>    | 0.71 (0.54, 0.93) <sup>a</sup>    | 0.67 (0.47, 0.94) <sup>a</sup>    | 0.78 (0.49, 1.25)                 | 0.48 (0.21, 1.08)               | 1.37 (0.53, 3.55)                | 3.19 (1.04, 9.73) <sup>a</sup>    |
| Arrhythmia                 | 222                    | 0.82 (0.60, 1.12)                 | 0.88 (0.63, 1.22)                 | 0.77 (0.53, 1.13)                 | 0.81 (0.53, 1.25)                 | 0.81 (0.49, 1.34)                 | 0.72 (0.34, 1.51)                 | 0.72 (0.26, 2.00)               | 1.08 (0.25, 4.64)                | 12.07 (0.74, 195.62) <sup>b</sup> |
| Cerebrovascular            | 62                     | 0.87 (0.49, 1.54)                 | 0.72 (0.38, 1.34)                 | 0.88 (0.45, 1.71)                 | 1.08 (0.51, 2.29)                 | 1.05 (0.44, 2.52)                 | 1.13 (0.34, 3.73)                 | 1.11 (0.21, 5.77)               | 2.15 (0.22, 21.55) <sup>b</sup>  | 5.07 (0.46, 56.06) <sup>b</sup>   |
| Ischemic                   | 35                     | 1.34 (0.62, 2.89)                 | 1.60 (0.74, 3.47)                 | 1.54 (0.68, 3.48)                 | 2.75 (1.20, 6.29) <sup>a</sup>    | 3.23 (1.36, 7.64) <sup>a</sup>    | 2.73 (0.87, 8.52)                 | 2.47 (0.43, 14.20)              |                                  |                                   |
| Myocardial infarction      | 20                     | 1.94 (0.69, 5.45)                 | 1.84 (0.66, 5.14)                 | 1.50 (0.50, 4.54)                 | 3.03 (0.98, 9.34)                 | 3.55 (1.11, 11.35) <sup>a</sup>   | 3.96 (0.80, 19.50)                | 2.16 (0.15, 30.99) <sup>b</sup> |                                  |                                   |
| Heart failure              | 135                    | 1.07 (0.73, 1.56)                 | 0.86 (0.57, 1.31)                 | 1.04 (0.67, 1.61)                 | 1.20 (0.74, 1.94)                 | 0.79 (0.42, 1.47)                 | 0.52 (0.21, 1.32)                 | 0.37 (0.09, 1.57)               | 1.39 (0.28, 6.90)                |                                   |
| Heat illness               | 10                     | 11.46 (1.30, 100.82) <sup>a</sup> | 14.38 (1.70, 121.61) <sup>a</sup> | 15.99 (1.92, 132.92) <sup>a</sup> | 25.28 (2.96, 215.67) <sup>a</sup> | 18.82 (1.86, 190.33) <sup>a</sup> | 28.08 (3.20, 246.69) <sup>a</sup> | 8.74 (1.20, 63.76) <sup>a</sup> | 6.98 (0.43, 113.46) <sup>b</sup> |                                   |

<sup>a</sup> 95% CI does not include the null.

<sup>b</sup> This footnote is to designate that only one ED visit related to the indicated health outcome occurred on an exposed day (i.e., a day during which the HI exceeded the indicated threshold) during the study period.

Note: Conditional logistic regression models adjusted for daily PM<sub>2.5</sub> concentration were used to estimate odds ratios. Abbreviations: COPD, chronic obstructive pulmonary disease.

Table S2b. Odds ratios and 95% confidence intervals for emergency department (ED) visits among Alaskan Native people for heat index (HI) on lag day 1 above versus below the threshold from single-day lag models in Anchorage, Fairbanks, and the Matanuska-Susitna Valley, Alaska, 2015-2019

| <i>Reason for ED visit</i> | <i>Number of cases</i> | <b>70-degree HI threshold</b>   | <b>72-degree HI threshold</b>     | <b>74-degree HI threshold</b>  | <b>76-degree HI threshold</b>   | <b>78-degree HI threshold</b> | <b>80-degree HI threshold</b>  | <b>82-degree HI threshold</b>     | <b>84-degree HI threshold</b>   | <b>86-degree HI threshold</b>   |
|----------------------------|------------------------|---------------------------------|-----------------------------------|--------------------------------|---------------------------------|-------------------------------|--------------------------------|-----------------------------------|---------------------------------|---------------------------------|
| Asthma                     | 920                    | 1.03 (0.89, 1.19)               | 1.11 (0.96, 1.30)                 | 1.12 (0.95, 1.32)              | 1.06 (0.88, 1.29)               | 1.13 (0.90, 1.41)             | 1.26 (0.93, 1.72)              | 1.31 (0.87, 1.99)                 | 1.49 (0.75, 2.99)               |                                 |
| COPD                       | 477                    | 0.90 (0.73, 1.10)               | 0.83 (0.66, 1.04)                 | 0.75 (0.58, 0.97) <sup>a</sup> | 0.92 (0.69, 1.22)               | 0.76 (0.53, 1.08)             | 0.55 (0.32, 0.97) <sup>a</sup> | 0.67 (0.32, 1.40)                 | 0.51 (0.12, 2.19)               |                                 |
| Pneumonia                  | 625                    | 0.80 (0.67, 0.96) <sup>a</sup>  | 0.80 (0.65, 0.97) <sup>a</sup>    | 0.78 (0.63, 0.98) <sup>a</sup> | 0.93 (0.73, 1.20)               | 0.98 (0.73, 1.32)             | 1.31 (0.90, 1.92)              | 1.48 (0.89, 2.46)                 | 1.82 (0.85, 3.89)               | 1.80 (0.22, 14.73) <sup>b</sup> |
| Bronchitis                 | 597                    | 0.86 (0.72, 1.03)               | 0.84 (0.69, 1.02)                 | 0.75 (0.60, 0.94) <sup>a</sup> | 0.74 (0.57, 0.97) <sup>a</sup>  | 0.77 (0.56, 1.07)             | 0.72 (0.45, 1.16)              | 1.08 (0.61, 1.89)                 | 1.28 (0.50, 3.29)               |                                 |
| Arrhythmia                 | 222                    | 0.95 (0.70, 1.28)               | 0.97 (0.70, 1.33)                 | 0.95 (0.67, 1.35)              | 1.12 (0.76, 1.66)               | 1.22 (0.77, 1.93)             | 0.67 (0.31, 1.45)              | 0.34 (0.08, 1.50)                 |                                 |                                 |
| Cerebrovascular            | 62                     | 0.76 (0.42, 1.35)               | 0.56 (0.29, 1.09)                 | 0.66 (0.32, 1.35)              | 0.96 (0.46, 2.00)               | 1.33 (0.60, 2.96)             | 1.40 (0.44, 4.44)              | 0.95 (0.20, 4.41)                 |                                 |                                 |
| Ischemic                   | 35                     | 1.36 (0.66, 2.81)               | 1.74 (0.83, 3.67)                 | 2.29 (1.09, 4.79) <sup>a</sup> | 3.04 (1.40, 6.62) <sup>a</sup>  | 2.12 (0.89, 5.05)             | 2.62 (0.83, 8.26)              | 1.46 (0.31, 7.01)                 | 3.42 (0.34, 34.58) <sup>b</sup> |                                 |
| Myocardial infarction      | 20                     | 1.71 (0.65, 4.55)               | 2.14 (0.77, 5.90)                 | 3.09 (1.13, 8.41) <sup>a</sup> | 3.24 (1.10, 9.52) <sup>a</sup>  | 0.78 (0.16, 3.76)             | 1.92 (0.31, 11.71)             | 3.18 (0.53, 19.28)                | 4.80 (0.39, 59.45) <sup>b</sup> |                                 |
| Heart failure              | 135                    | 1.08 (0.74, 1.58)               | 0.92 (0.61, 1.38)                 | 0.89 (0.56, 1.39)              | 1.05 (0.64, 1.72)               | 0.89 (0.48, 1.63)             | 1.17 (0.55, 2.49)              | 1.41 (0.55, 3.61)                 | 0.45 (0.05, 3.87) <sup>b</sup>  | 3.06 (0.31, 30.09) <sup>b</sup> |
| Heat illness               | 10                     | 9.21 (1.02, 83.25) <sup>a</sup> | 14.50 (1.64, 128.00) <sup>a</sup> | 4.20 (0.96, 18.31)             | 6.36 (1.49, 27.17) <sup>a</sup> | 4.39 (0.93, 20.61)            | 7.04 (0.92, 53.92)             | 14.77 (0.71, 309.41) <sup>b</sup> |                                 |                                 |

<sup>a</sup>95% CI does not include the null.

<sup>b</sup>This footnote is to designate that only one ED visit related to the indicated health outcome occurred one day after an exposure (i.e., a day during which the HI exceeded the indicated threshold) during the study period.

Note: Conditional logistic regression models adjusted for daily PM<sub>2.5</sub> concentration were used to estimate odds ratios. Abbreviations: COPD, chronic obstructive pulmonary disease.

Table S2c. Odds ratios and 95% confidence intervals for emergency department (ED) visits among Alaskan Native people for heat index (HI) on lag day 2 above versus below the threshold from single-day lag models in Anchorage, Fairbanks, and the Matanuska-Susitna Valley, Alaska, 2015-2019

| <i>Reason for ED visit</i> | <i>Number of cases</i> | <b>70-degree HI threshold</b>  | <b>72-degree HI threshold</b>  | <b>74-degree HI threshold</b> | <b>76-degree HI threshold</b> | <b>78-degree HI threshold</b>  | <b>80-degree HI threshold</b>   | <b>82-degree HI threshold</b>   | <b>84-degree HI threshold</b>   | <b>86-degree HI threshold</b>   |
|----------------------------|------------------------|--------------------------------|--------------------------------|-------------------------------|-------------------------------|--------------------------------|---------------------------------|---------------------------------|---------------------------------|---------------------------------|
| Asthma                     | 920                    | 1.09 (0.94, 1.26)              | 1.13 (0.97, 1.32)              | 1.01 (0.85, 1.20)             | 1.08 (0.89, 1.31)             | 1.06 (0.84, 1.34)              | 1.04 (0.75, 1.44)               | 1.09 (0.69, 1.71)               | 1.41 (0.68, 2.92)               | 0.97 (0.12, 7.53) <sup>b</sup>  |
| COPD                       | 477                    | 0.90 (0.73, 1.10)              | 0.77 (0.61, 0.96) <sup>a</sup> | 0.83 (0.64, 1.06)             | 0.84 (0.62, 1.12)             | 0.84 (0.59, 1.20)              | 0.60 (0.34, 1.06)               | 0.78 (0.37, 1.66)               | 1.49 (0.51, 4.35)               | 2.63 (0.30, 22.91) <sup>b</sup> |
| Pneumonia                  | 625                    | 0.82 (0.68, 0.99) <sup>a</sup> | 0.82 (0.68, 1.01)              | 0.81 (0.65, 1.01)             | 0.88 (0.68, 1.14)             | 1.10 (0.82, 1.48)              | 1.42 (0.96, 2.10)               | 1.65 (0.98, 2.78)               | 0.98 (0.35, 2.77)               |                                 |
| Bronchitis                 | 597                    | 0.82 (0.69, 0.99) <sup>a</sup> | 0.88 (0.72, 1.07)              | 0.81 (0.65, 1.02)             | 0.88 (0.68, 1.14)             | 0.87 (0.64, 1.19)              | 0.94 (0.60, 1.45)               | 0.99 (0.54, 1.84)               | 0.25 (0.03, 1.82) <sup>b</sup>  | 1.79 (0.22, 14.62) <sup>b</sup> |
| Arrhythmia                 | 222                    | 0.92 (0.68, 1.24)              | 0.86 (0.62, 1.20)              | 0.95 (0.67, 1.36)             | 1.03 (0.69, 1.54)             | 0.84 (0.51, 1.39)              | 0.57 (0.26, 1.25)               | 0.29 (0.07, 1.26)               |                                 |                                 |
| Cerebrovascular            | 62                     | 0.74 (0.41, 1.34)              | 0.75 (0.40, 1.41)              | 0.72 (0.35, 1.49)             | 0.89 (0.40, 1.98)             | 0.91 (0.35, 2.40)              | 1.09 (0.32, 3.79)               | 1.28 (0.26, 6.17)               | 3.66 (0.38, 35.55) <sup>b</sup> |                                 |
| Ischemic                   | 35                     | 1.63 (0.80, 3.34)              | 1.53 (0.73, 3.17)              | 2.08 (1.00, 4.36)             | 2.11 (0.92, 4.85)             | 1.22 (0.43, 3.46)              | 2.13 (0.58, 7.87)               | 1.49 (0.30, 7.55)               |                                 |                                 |
| Myocardial infarction      | 20                     | 2.18 (0.83, 5.72)              | 1.77 (0.67, 4.67)              | 2.37 (0.88, 6.36)             | 1.58 (0.48, 5.22)             | 1.16 (0.24, 5.55)              | 2.59 (0.47, 14.41)              | 1.70 (0.19, 15.07) <sup>b</sup> |                                 |                                 |
| Heart failure              | 135                    | 0.97 (0.66, 1.42)              | 1.02 (0.68, 1.53)              | 0.73 (0.46, 1.17)             | 0.81 (0.47, 1.38)             | 0.97 (0.53, 1.76)              | 0.95 (0.41, 2.19)               | 0.68 (0.19, 2.40)               |                                 |                                 |
| Heat illness               | 10                     | 1.08 (0.28, 4.16)              | 1.02 (0.27, 3.92)              | 0.63 (0.13, 3.09)             | 1.01 (0.20, 4.97)             | 0.87 (0.10, 7.30) <sup>b</sup> | 1.29 (0.14, 12.01) <sup>b</sup> |                                 |                                 |                                 |

<sup>a</sup>95% CI does not include the null.

<sup>b</sup>This footnote is to designate that only one ED visit related to the indicated health outcome occurred two days after an exposure (i.e., a day during which the HI exceeded the indicated threshold) during the study period.

Note: Conditional logistic regression models adjusted for daily PM<sub>2.5</sub> concentration were used to estimate odds ratios. Abbreviations: COPD, chronic obstructive pulmonary disease.

Table S2d. Odds ratios and 95% confidence intervals for emergency department (ED) visits among Alaskan Native people for heat index (HI) on lag day 3 above versus below the threshold from single-day lag models in Anchorage, Fairbanks, and the Matanuska-Susitna Valley, Alaska, 2015-2019

| <i>Reason for ED visit</i> | <i>Number of cases</i> | <b>70-degree HI threshold</b>  | <b>72-degree HI threshold</b>  | <b>74-degree HI threshold</b> | <b>76-degree HI threshold</b>  | <b>78-degree HI threshold</b>  | <b>80-degree HI threshold</b> | <b>82-degree HI threshold</b>  | <b>84-degree HI threshold</b>   | <b>86-degree HI threshold</b>   |
|----------------------------|------------------------|--------------------------------|--------------------------------|-------------------------------|--------------------------------|--------------------------------|-------------------------------|--------------------------------|---------------------------------|---------------------------------|
| Asthma                     | 920                    | 1.01 (0.87, 1.16)              | 0.96 (0.82, 1.12)              | 1.02 (0.86, 1.21)             | 1.01 (0.83, 1.23)              | 1.00 (0.79, 1.28)              | 1.03 (0.74, 1.43)             | 1.29 (0.83, 1.99)              | 1.67 (0.79, 3.56)               | 2.96 (0.33, 26.48) <sup>b</sup> |
| COPD                       | 477                    | 0.91 (0.74, 1.12)              | 0.84 (0.67, 1.05)              | 0.82 (0.64, 1.06)             | 0.89 (0.67, 1.19)              | 0.98 (0.69, 1.37)              | 0.76 (0.44, 1.32)             | 0.97 (0.47, 2.01)              | 1.09 (0.32, 3.69)               | 3.06 (0.34, 27.42) <sup>b</sup> |
| Pneumonia                  | 625                    | 0.89 (0.74, 1.07)              | 0.92 (0.76, 1.12)              | 0.84 (0.67, 1.06)             | 0.91 (0.70, 1.18)              | 0.83 (0.60, 1.15)              | 0.98 (0.63, 1.54)             | 1.55 (0.88, 2.72)              | 2.08 (0.91, 4.79)               | 1.59 (0.20, 12.76) <sup>b</sup> |
| Bronchitis                 | 597                    | 0.77 (0.64, 0.93) <sup>a</sup> | 0.79 (0.65, 0.97) <sup>a</sup> | 0.84 (0.67, 1.06)             | 0.74 (0.56, 0.98) <sup>a</sup> | 0.89 (0.64, 1.22)              | 0.85 (0.54, 1.35)             | 0.89 (0.43, 1.82)              | 1.10 (0.33, 3.67)               |                                 |
| Arrhythmia                 | 222                    | 1.01 (0.75, 1.37)              | 0.77 (0.55, 1.08)              | 0.81 (0.56, 1.18)             | 0.86 (0.56, 1.32)              | 0.75 (0.44, 1.26)              | 0.57 (0.27, 1.21)             | 0.69 (0.27, 1.80)              | 0.50 (0.07, 3.79) <sup>b</sup>  |                                 |
| Cerebrovascular            | 62                     | 0.93 (0.53, 1.63)              | 1.12 (0.62, 2.04)              | 0.78 (0.38, 1.60)             | 1.29 (0.62, 2.68)              | 1.48 (0.63, 3.44)              | 1.67 (0.56, 4.97)             | 0.52 (0.05, 5.23) <sup>b</sup> |                                 |                                 |
| Ischemic                   | 35                     | 1.42 (0.68, 2.94)              | 1.51 (0.71, 3.22)              | 1.51 (0.67, 3.39)             | 2.10 (0.89, 4.97)              | 2.81 (1.06, 7.49) <sup>a</sup> | 3.31 (0.92, 11.84)            | 1.59 (0.30, 8.46)              | 1.88 (0.18, 19.46) <sup>b</sup> |                                 |
| Myocardial infarction      | 20                     | 0.97 (0.35, 2.65)              | 1.20 (0.43, 3.36)              | 1.54 (0.52, 4.54)             | 1.65 (0.50, 5.43)              | 2.42 (0.61, 9.62)              | 4.91 (0.82, 29.30)            | 3.27 (0.47, 22.58)             | 2.09 (0.18, 24.13) <sup>b</sup> |                                 |
| Heart failure              | 135                    | 1.03 (0.71, 1.52)              | 0.96 (0.64, 1.44)              | 1.04 (0.68, 1.61)             | 0.90 (0.54, 1.51)              | 1.00 (0.55, 1.84)              | 0.62 (0.25, 1.54)             | 1.83 (0.77, 4.38)              | 2.81 (0.89, 8.91)               | 3.02 (0.31, 29.72) <sup>b</sup> |
| Heat illness               | 10                     | 0.47 (0.11, 2.00)              | 0.40 (0.08, 2.03)              | 0.69 (0.13, 3.55)             | 0.44 (0.05, 3.64) <sup>b</sup> |                                |                               |                                |                                 |                                 |

<sup>a</sup>95% CI does not include the null.

<sup>b</sup>This footnote is to designate that only one ED visit related to the indicated health outcome occurred three days after an exposure (i.e., a day during which the HI exceeded the indicated threshold) during the study period.

Note: Conditional logistic regression models adjusted for daily PM<sub>2.5</sub> concentration were used to estimate odds ratios. Abbreviations: COPD, chronic obstructive pulmonary disease.



Table S2e. Odds ratios and 95% confidence intervals for emergency department (ED) visits among Alaskan Native people for heat index (HI) on lag day 4 above versus below the threshold from single-day lag models in Anchorage, Fairbanks, and the Matanuska-Susitna Valley, Alaska, 2015-2019

| <i>Reason for ED visit</i> | <i>Number of cases</i> | <b>70-degree HI threshold</b>  | <b>72-degree HI threshold</b>  | <b>74-degree HI threshold</b> | <b>76-degree HI threshold</b>  | <b>78-degree HI threshold</b>  | <b>80-degree HI threshold</b>   | <b>82-degree HI threshold</b>   | <b>84-degree HI threshold</b>   | <b>86-degree HI threshold</b>   |
|----------------------------|------------------------|--------------------------------|--------------------------------|-------------------------------|--------------------------------|--------------------------------|---------------------------------|---------------------------------|---------------------------------|---------------------------------|
| Asthma                     | 920                    | 0.88 (0.76, 1.02)              | 0.87 (0.75, 1.03)              | 0.93 (0.78, 1.11)             | 0.95 (0.78, 1.17)              | 1.03 (0.81, 1.31)              | 1.07 (0.77, 1.49)               | 0.98 (0.60, 1.59)               | 0.90 (0.38, 2.18)               |                                 |
| COPD                       | 477                    | 0.93 (0.76, 1.14)              | 0.91 (0.73, 1.13)              | 0.94 (0.73, 1.20)             | 0.99 (0.75, 1.31)              | 0.97 (0.69, 1.35)              | 1.06 (0.66, 1.68)               | 0.84 (0.39, 1.79)               | 1.28 (0.37, 4.38)               | 4.40 (0.45, 43.09) <sup>b</sup> |
| Pneumonia                  | 625                    | 0.97 (0.81, 1.17)              | 1.07 (0.88, 1.29)              | 0.89 (0.71, 1.11)             | 0.86 (0.66, 1.12)              | 0.83 (0.60, 1.15)              | 1.06 (0.68, 1.65)               | 1.33 (0.74, 2.38)               | 1.92 (0.84, 4.36)               | 1.37 (0.17, 10.81) <sup>b</sup> |
| Bronchitis                 | 597                    | 0.78 (0.65, 0.94) <sup>a</sup> | 0.79 (0.64, 0.97) <sup>a</sup> | 0.81 (0.65, 1.03)             | 0.79 (0.60, 1.04)              | 0.83 (0.60, 1.14)              | 0.72 (0.45, 1.16)               | 0.46 (0.20, 1.07)               |                                 |                                 |
| Arrhythmia                 | 222                    | 0.96 (0.71, 1.30)              | 1.01 (0.73, 1.39)              | 0.82 (0.56, 1.19)             | 0.93 (0.60, 1.42)              | 0.99 (0.60, 1.64)              | 0.92 (0.46, 1.84)               | 1.03 (0.42, 2.53)               | 1.01 (0.21, 5.02)               |                                 |
| Cerebrovascular            | 62                     | 1.09 (0.63, 1.89)              | 1.24 (0.70, 2.21)              | 1.30 (0.70, 2.41)             | 1.23 (0.60, 2.51)              | 1.17 (0.49, 2.77)              | 2.18 (0.83, 5.72)               | 0.78 (0.16, 3.79)               | 1.85 (0.22, 15.81) <sup>b</sup> |                                 |
| Ischemic                   | 35                     | 0.85 (0.40, 1.81)              | 1.05 (0.49, 2.23)              | 1.71 (0.79, 3.73)             | 1.77 (0.77, 4.10)              | 1.35 (0.49, 3.72)              | 1.94 (0.60, 6.22)               | 2.91 (0.57, 14.88)              |                                 |                                 |
| Myocardial infarction      | 20                     | 0.78 (0.27, 2.25)              | 0.95 (0.33, 2.72)              | 1.62 (0.55, 4.77)             | 2.25 (0.74, 6.86)              | 1.51 (0.36, 6.27)              | 3.53 (0.85, 14.72)              | 7.60 (1.15, 50.14) <sup>a</sup> |                                 |                                 |
| Heart failure              | 135                    | 1.22 (0.84, 1.78)              | 1.24 (0.84, 1.82)              | 1.15 (0.76, 1.76)             | 1.01 (0.62, 1.64)              | 1.01 (0.56, 1.83)              | 1.22 (0.60, 2.47)               | 0.62 (0.20, 1.93)               | 1.71 (0.37, 7.85)               | 2.69 (0.27, 26.78) <sup>b</sup> |
| Heat illness               | 10                     | 0.78 (0.21, 2.94)              | 1.21 (0.31, 4.70)              | 0.94 (0.22, 4.01)             | 0.38 (0.05, 3.18) <sup>b</sup> | 0.61 (0.07, 5.13) <sup>b</sup> | 1.11 (0.12, 10.27) <sup>b</sup> | 2.70 (0.22, 33.10) <sup>b</sup> |                                 |                                 |

<sup>a</sup>95% CI does not include the null.

<sup>b</sup>This footnote is to designate that only one ED visit related to the indicated health outcome occurred four days after an exposure (i.e., a day during which the HI exceeded the indicated threshold) during the study period.

Note: Conditional logistic regression models adjusted for daily PM<sub>2.5</sub> concentration were used to estimate odds ratios. Abbreviations: COPD, chronic obstructive pulmonary disease.

Table S2f. Odds ratios and 95% confidence intervals for emergency department (ED) visits among Alaskan Native people for heat index (HI) on lag day 5 above versus below the threshold from single-day lag models in Anchorage, Fairbanks, and the Matanuska-Susitna Valley, Alaska, 2015-2019

| <i>Reason for ED visit</i> | <i>Number of cases</i> | <b>70-degree HI threshold</b>  | <b>72-degree HI threshold</b>  | <b>74-degree HI threshold</b> | <b>76-degree HI threshold</b> | <b>78-degree HI threshold</b> | <b>80-degree HI threshold</b> | <b>82-degree HI threshold</b> | <b>84-degree HI threshold</b>  | <b>86-degree HI threshold</b> |
|----------------------------|------------------------|--------------------------------|--------------------------------|-------------------------------|-------------------------------|-------------------------------|-------------------------------|-------------------------------|--------------------------------|-------------------------------|
| Asthma                     | 920                    | 0.85 (0.74, 0.99) <sup>a</sup> | 0.89 (0.76, 1.05)              | 1.00 (0.84, 1.19)             | 0.90 (0.73, 1.11)             | 0.90 (0.70, 1.15)             | 0.88 (0.62, 1.25)             | 0.79 (0.47, 1.32)             | 0.82 (0.32, 2.06)              |                               |
| COPD                       | 477                    | 0.89 (0.73, 1.10)              | 0.86 (0.68, 1.07)              | 0.85 (0.66, 1.09)             | 0.81 (0.61, 1.09)             | 0.73 (0.50, 1.05)             | 0.69 (0.41, 1.17)             | 0.66 (0.29, 1.47)             |                                |                               |
| Pneumonia                  | 625                    | 0.89 (0.74, 1.07)              | 0.94 (0.77, 1.15)              | 0.84 (0.67, 1.05)             | 0.80 (0.61, 1.05)             | 0.82 (0.60, 1.14)             | 0.94 (0.60, 1.45)             | 1.24 (0.70, 2.18)             | 0.26 (0.04, 1.94) <sup>b</sup> |                               |
| Bronchitis                 | 597                    | 0.76 (0.63, 0.92) <sup>a</sup> | 0.79 (0.65, 0.98) <sup>a</sup> | 0.83 (0.66, 1.04)             | 0.98 (0.76, 1.26)             | 0.89 (0.65, 1.22)             | 0.78 (0.49, 1.26)             | 1.20 (0.63, 2.28)             | 2.38 (0.80, 7.08)              |                               |
| Arrhythmia                 | 222                    | 0.80 (0.59, 1.09)              | 0.90 (0.65, 1.25)              | 0.79 (0.54, 1.15)             | 0.87 (0.57, 1.33)             | 0.80 (0.48, 1.36)             | 1.31 (0.71, 2.41)             | 1.17 (0.51, 2.70)             | 1.02 (0.24, 4.39)              |                               |
| Cerebrovascular            | 62                     | 1.19 (0.69, 2.05)              | 1.32 (0.76, 2.30)              | 1.41 (0.77, 2.59)             | 1.28 (0.65, 2.55)             | 1.05 (0.45, 2.42)             | 2.05 (0.79, 5.29)             | 2.71 (0.81, 9.13)             |                                |                               |
| Ischemic                   | 35                     | 1.39 (0.68, 2.85)              | 1.88 (0.91, 3.87)              | 1.74 (0.81, 3.75)             | 1.43 (0.60, 3.42)             | 1.98 (0.76, 5.12)             | 2.67 (0.90, 7.89)             |                               |                                |                               |
| Myocardial infarction      | 20                     | 1.60 (0.61, 4.20)              | 2.29 (0.86, 6.09)              | 2.28 (0.80, 6.44)             | 1.86 (0.59, 5.91)             | 3.10 (0.89, 10.80)            | 3.27 (0.75, 14.15)            |                               |                                |                               |
| Heart failure              | 135                    | 1.13 (0.78, 1.64)              | 1.04 (0.70, 1.55)              | 1.05 (0.68, 1.61)             | 0.84 (0.51, 1.40)             | 0.97 (0.55, 1.73)             | 1.00 (0.48, 2.09)             | 0.87 (0.28, 2.66)             | 1.54 (0.33, 7.26)              |                               |
| Heat illness               | 10                     | 0.76 (0.20, 2.90)              | 1.18 (0.31, 4.56)              | 1.03 (0.25, 4.28)             | 1.02 (0.19, 5.39)             | 0.85 (0.11, 6.33)             | 1.60 (0.16, 15.97)            | 6.34 (0.45, 90.31)            |                                |                               |

<sup>a</sup>95% CI does not include the null.

<sup>b</sup>This footnote is to designate that only one ED visit related to the indicated health outcome occurred five days after an exposure (i.e., a day during which the HI exceeded the indicated threshold) during the study period.

Note: Conditional logistic regression models adjusted for daily PM<sub>2.5</sub> concentration were used to estimate odds ratios. Abbreviations: COPD, chronic obstructive pulmonary disease.

Table S2g. Odds ratios and 95% confidence intervals for emergency department (ED) visits among Non-Alaskan Native people for same-day heat index (HI) above versus below the threshold from single-day lag models in Anchorage, Fairbanks, and the Matanuska-Susitna Valley, Alaska, 2015-2019

| <i>Reason for ED visit</i> | <i>Number of cases</i> | <b>70-degree HI threshold</b>    | <b>72-degree HI threshold</b>    | <b>74-degree HI threshold</b>   | <b>76-degree HI threshold</b>    | <b>78-degree HI threshold</b>    | <b>80-degree HI threshold</b>      | <b>82-degree HI threshold</b>     | <b>84-degree HI threshold</b>    | <b>86-degree HI threshold</b>   |
|----------------------------|------------------------|----------------------------------|----------------------------------|---------------------------------|----------------------------------|----------------------------------|------------------------------------|-----------------------------------|----------------------------------|---------------------------------|
| Asthma                     | 1907                   | 0.99 (0.89, 1.09)                | 1.01 (0.91, 1.13)                | 1.01 (0.90, 1.13)               | 1.01 (0.88, 1.15)                | 1.03 (0.88, 1.21)                | 1.08 (0.88, 1.32)                  | 1.07 (0.82, 1.40)                 | 1.00 (0.64, 1.58)                | 0.42 (0.06, 3.12) <sup>b</sup>  |
| COPD                       | 1627                   | 1.00 (0.90, 1.12)                | 1.03 (0.92, 1.16)                | 1.03 (0.91, 1.17)               | 1.04 (0.90, 1.20)                | 1.05 (0.88, 1.26)                | 0.88 (0.68, 1.14)                  | 0.74 (0.51, 1.09)                 | 0.85 (0.45, 1.57)                | 0.74 (0.18, 3.09)               |
| Pneumonia                  | 1372                   | 1.00 (0.88, 1.13)                | 1.04 (0.91, 1.18)                | 0.98 (0.85, 1.13)               | 0.96 (0.81, 1.13)                | 1.08 (0.89, 1.31)                | 1.17 (0.91, 1.52)                  | 1.26 (0.89, 1.78)                 | 1.24 (0.69, 2.21)                | 1.46 (0.44, 4.83)               |
| Bronchitis                 | 1301                   | 0.73 (0.64, 0.82) <sup>a</sup>   | 0.83 (0.73, 0.95) <sup>a</sup>   | 0.82 (0.70, 0.95) <sup>a</sup>  | 0.78 (0.66, 0.94) <sup>a</sup>   | 0.74 (0.59, 0.92) <sup>a</sup>   | 0.82 (0.62, 1.08)                  | 0.81 (0.55, 1.19)                 | 1.01 (0.55, 1.83)                | 0.74 (0.18, 3.09)               |
| Arrhythmia                 | 1325                   | 0.99 (0.87, 1.11)                | 0.98 (0.86, 1.12)                | 1.00 (0.87, 1.16)               | 0.92 (0.78, 1.09)                | 0.92 (0.75, 1.12)                | 0.80 (0.61, 1.07)                  | 0.79 (0.53, 1.18)                 | 0.67 (0.33, 1.37)                | 0.42 (0.06, 3.07) <sup>b</sup>  |
| Cerebrovascular            | 350                    | 0.95 (0.75, 1.21)                | 0.87 (0.67, 1.13)                | 1.00 (0.75, 1.32)               | 1.04 (0.75, 1.43)                | 1.01 (0.68, 1.49)                | 1.01 (0.60, 1.69)                  | 1.52 (0.82, 2.80)                 | 1.69 (0.71, 4.04)                | 1.31 (0.17, 10.25) <sup>b</sup> |
| Ischemic                   | 156                    | 1.09 (0.76, 1.56)                | 1.15 (0.78, 1.68)                | 1.18 (0.78, 1.79)               | 1.02 (0.62, 1.67)                | 1.09 (0.61, 1.94)                | 1.73 (0.79, 3.81)                  | 1.88 (0.69, 5.09)                 | 0.78 (0.10, 6.06) <sup>b</sup>   | 7.23 (0.63, 83.35) <sup>b</sup> |
| Myocardial infarction      | 55                     | 1.52 (0.81, 2.86)                | 1.49 (0.74, 2.99)                | 2.06 (1.00, 4.26)               | 2.07 (0.91, 4.75)                | 1.61 (0.51, 5.01)                | 2.23 (0.43, 11.54)                 |                                   |                                  |                                 |
| Heart failure              | 286                    | 0.73 (0.56, 0.96) <sup>a</sup>   | 0.79 (0.59, 1.05)                | 0.81 (0.59, 1.13)               | 0.81 (0.55, 1.18)                | 0.87 (0.56, 1.37)                | 1.02 (0.57, 1.85)                  | 0.75 (0.29, 1.93)                 | 1.07 (0.25, 4.61)                | 2.42 (0.28, 20.86) <sup>b</sup> |
| Heat illness               | 23                     | 15.08 (3.29, 68.98) <sup>a</sup> | 10.29 (2.97, 35.59) <sup>a</sup> | 9.87 (3.19, 30.48) <sup>a</sup> | 18.02 (5.82, 55.78) <sup>a</sup> | 21.97 (7.58, 63.64) <sup>a</sup> | 89.72 (17.34, 464.37) <sup>a</sup> | 38.08 (8.84, 163.95) <sup>a</sup> | 12.91 (4.06, 41.05) <sup>a</sup> |                                 |

<sup>a</sup>95% CI does not include the null.

<sup>b</sup>This footnote is to designate that only one ED visit related to the indicated health outcome occurred on an exposed day (i.e., a day during which the HI exceeded the indicated threshold) during the study period.

Note: Conditional logistic regression models adjusted for daily PM<sub>2.5</sub> concentration were used to estimate odds ratios. Abbreviations: COPD, chronic obstructive pulmonary disease.

Table S2h. Odds ratios and 95% confidence intervals for emergency department (ED) visits among Non-Alaskan Native people for heat index (HI) on lag day 1 above versus below the threshold from single-day lag models in Anchorage, Fairbanks, and the Matanuska-Susitna Valley, Alaska, 2015-2019

| <i>Reason for ED visit</i> | <i>Number of cases</i> | <b>70-degree HI threshold</b>    | <b>72-degree HI threshold</b>   | <b>74-degree HI threshold</b>   | <b>76-degree HI threshold</b>    | <b>78-degree HI threshold</b>    | <b>80-degree HI threshold</b>      | <b>82-degree HI threshold</b>    | <b>84-degree HI threshold</b>     | <b>86-degree HI threshold</b>   |
|----------------------------|------------------------|----------------------------------|---------------------------------|---------------------------------|----------------------------------|----------------------------------|------------------------------------|----------------------------------|-----------------------------------|---------------------------------|
| Asthma                     | 1907                   | 0.99 (0.89, 1.09)                | 1.05 (0.94, 1.16)               | 1.03 (0.91, 1.15)               | 1.06 (0.93, 1.21)                | 1.11 (0.95, 1.29)                | 1.18 (0.98, 1.44)                  | 1.19 (0.92, 1.55)                | 0.99 (0.62, 1.58)                 | 1.07 (0.38, 2.99)               |
| COPD                       | 1627                   | 0.95 (0.85, 1.06)                | 0.98 (0.87, 1.10)               | 1.00 (0.88, 1.14)               | 0.98 (0.85, 1.14)                | 0.89 (0.74, 1.07)                | 0.72 (0.55, 0.95) <sup>a</sup>     | 0.74 (0.50, 1.07)                | 0.85 (0.46, 1.58)                 | 1.48 (0.52, 4.17)               |
| Pneumonia                  | 1372                   | 0.94 (0.83, 1.06)                | 0.94 (0.82, 1.07)               | 0.96 (0.84, 1.11)               | 0.97 (0.83, 1.15)                | 1.14 (0.94, 1.37)                | 1.23 (0.95, 1.58)                  | 1.34 (0.96, 1.87)                | 1.39 (0.82, 2.36)                 | 0.50 (0.07, 3.69) <sup>b</sup>  |
| Bronchitis                 | 1301                   | 0.75 (0.66, 0.85) <sup>a</sup>   | 0.82 (0.72, 0.94) <sup>a</sup>  | 0.83 (0.71, 0.97) <sup>a</sup>  | 0.78 (0.65, 0.93) <sup>a</sup>   | 0.79 (0.64, 0.98) <sup>a</sup>   | 0.78 (0.59, 1.04)                  | 0.71 (0.47, 1.07)                | 0.91 (0.50, 1.65)                 | 1.17 (0.42, 3.26)               |
| Arrhythmia                 | 1325                   | 1.03 (0.91, 1.16)                | 1.03 (0.90, 1.17)               | 0.99 (0.86, 1.14)               | 0.92 (0.78, 1.09)                | 1.05 (0.87, 1.28)                | 0.92 (0.69, 1.21)                  | 0.92 (0.63, 1.34)                | 1.26 (0.71, 2.26)                 | 2.71 (0.92, 8.02)               |
| Cerebrovascular            | 350                    | 0.99 (0.78, 1.26)                | 0.94 (0.73, 1.22)               | 0.95 (0.72, 1.27)               | 1.07 (0.78, 1.48)                | 1.14 (0.78, 1.68)                | 0.89 (0.51, 1.56)                  | 0.70 (0.29, 1.66)                | 0.27 (0.04, 1.99) <sup>b</sup>    |                                 |
| Ischemic                   | 156                    | 1.12 (0.78, 1.60)                | 1.20 (0.82, 1.75)               | 1.34 (0.89, 2.01)               | 1.02 (0.61, 1.69)                | 0.85 (0.44, 1.65)                | 1.01 (0.43, 2.37)                  | 1.23 (0.41, 3.75)                | 3.23 (0.89, 11.71)                | 5.98 (1.09, 32.67) <sup>a</sup> |
| Myocardial infarction      | 55                     | 1.60 (0.88, 2.91)                | 1.61 (0.83, 3.11)               | 1.69 (0.82, 3.48)               | 1.27 (0.52, 3.07)                | 0.71 (0.15, 3.29)                |                                    |                                  |                                   |                                 |
| Heart failure              | 286                    | 0.72 (0.55, 0.94) <sup>a</sup>   | 0.76 (0.57, 1.02)               | 0.87 (0.64, 1.19)               | 0.76 (0.52, 1.11)                | 1.07 (0.70, 1.63)                | 0.69 (0.34, 1.38)                  | 0.86 (0.32, 2.26)                | 0.49 (0.06, 3.83) <sup>b</sup>    | 1.62 (0.20, 13.21) <sup>b</sup> |
| Heat illness               | 23                     | 15.40 (3.39, 70.00) <sup>a</sup> | 6.49 (2.30, 18.32) <sup>a</sup> | 9.26 (3.32, 25.82) <sup>a</sup> | 21.38 (6.76, 67.58) <sup>a</sup> | 26.92 (8.47, 85.57) <sup>a</sup> | 33.22 (10.62, 103.92) <sup>a</sup> | 11.54 (3.36, 39.59) <sup>a</sup> | 18.00 (3.01, 107.75) <sup>a</sup> |                                 |

<sup>a</sup>95% CI does not include the null.

<sup>b</sup>This footnote is to designate that only one ED visit related to the indicated health outcome occurred one day after an exposure (i.e., a day during which the HI exceeded the indicated threshold) during the study period.

Note: Conditional logistic regression models adjusted for daily PM<sub>2.5</sub> concentration were used to estimate odds ratios. Abbreviations: COPD, chronic obstructive pulmonary disease.

Table S2i. Odds ratios and 95% confidence intervals for emergency department (ED) visits among Non-Alaskan Native people for heat index (HI) on lag day 2 above versus below the threshold from single-day lag models in Anchorage, Fairbanks, and the Matanuska-Susitna Valley, Alaska, 2015-2019

| <i>Reason for ED visit</i> | <i>Number of cases</i> | <b>70-degree HI threshold</b>     | <b>72-degree HI threshold</b>    | <b>74-degree HI threshold</b>   | <b>76-degree HI threshold</b>    | <b>78-degree HI threshold</b>    | <b>80-degree HI threshold</b>   | <b>82-degree HI threshold</b> | <b>84-degree HI threshold</b>   | <b>86-degree HI threshold</b>   |
|----------------------------|------------------------|-----------------------------------|----------------------------------|---------------------------------|----------------------------------|----------------------------------|---------------------------------|-------------------------------|---------------------------------|---------------------------------|
| Asthma                     | 1907                   | 0.95 (0.86, 1.05)                 | 1.00 (0.90, 1.11)                | 1.00 (0.89, 1.12)               | 1.08 (0.94, 1.22)                | 1.05 (0.90, 1.23)                | 1.14 (0.94, 1.39)               | 1.10 (0.83, 1.45)             | 0.72 (0.42, 1.22)               | 0.67 (0.16, 2.79)               |
| COPD                       | 1627                   | 0.88 (0.78, 0.98) <sup>a</sup>    | 0.94 (0.84, 1.06)                | 0.89 (0.78, 1.02)               | 0.86 (0.74, 1.00)                | 0.79 (0.65, 0.95) <sup>a</sup>   | 0.83 (0.64, 1.08)               | 0.85 (0.59, 1.23)             | 0.59 (0.29, 1.21)               | 0.37 (0.05, 2.69) <sup>b</sup>  |
| Pneumonia                  | 1372                   | 0.96 (0.85, 1.08)                 | 0.91 (0.80, 1.04)                | 0.94 (0.81, 1.08)               | 1.04 (0.88, 1.22)                | 1.18 (0.98, 1.43)                | 1.24 (0.96, 1.59)               | 1.07 (0.75, 1.54)             | 0.97 (0.52, 1.82)               | 1.40 (0.50, 3.95)               |
| Bronchitis                 | 1301                   | 0.77 (0.68, 0.87) <sup>a</sup>    | 0.84 (0.73, 0.96) <sup>a</sup>   | 0.77 (0.66, 0.90) <sup>a</sup>  | 0.76 (0.63, 0.91) <sup>a</sup>   | 0.78 (0.63, 0.97) <sup>a</sup>   | 0.83 (0.62, 1.10)               | 0.71 (0.46, 1.10)             | 0.64 (0.31, 1.32)               | 0.79 (0.24, 2.53)               |
| Arrhythmia                 | 1325                   | 1.09 (0.96, 1.23)                 | 1.04 (0.92, 1.19)                | 0.98 (0.85, 1.13)               | 0.96 (0.81, 1.13)                | 0.95 (0.78, 1.16)                | 0.90 (0.68, 1.19)               | 0.98 (0.68, 1.43)             | 0.97 (0.52, 1.82)               | 1.13 (0.35, 3.70)               |
| Cerebrovascular            | 350                    | 1.05 (0.82, 1.33)                 | 1.01 (0.78, 1.30)                | 1.09 (0.83, 1.43)               | 1.03 (0.75, 1.41)                | 0.90 (0.60, 1.34)                | 0.71 (0.40, 1.27)               | 0.41 (0.15, 1.12)             | 0.63 (0.15, 2.62)               | 0.98 (0.13, 7.49) <sup>b</sup>  |
| Ischemic                   | 156                    | 1.34 (0.94, 1.90)                 | 1.40 (0.98, 2.02)                | 1.04 (0.69, 1.58)               | 0.90 (0.55, 1.48)                | 0.75 (0.39, 1.44)                | 0.66 (0.26, 1.68)               | 0.48 (0.11, 2.15)             | 0.89 (0.12, 6.91) <sup>b</sup>  |                                 |
| Myocardial infarction      | 55                     | 1.92 (1.04, 3.51) <sup>a</sup>    | 2.14 (1.14, 4.02) <sup>a</sup>   | 1.81 (0.87, 3.75)               | 0.99 (0.39, 2.54)                | 0.31 (0.04, 2.37) <sup>a</sup>   |                                 |                               |                                 |                                 |
| Heart failure              | 286                    | 0.78 (0.59, 1.01)                 | 0.79 (0.59, 1.06)                | 0.94 (0.69, 1.28)               | 1.01 (0.71, 1.42)                | 1.05 (0.69, 1.61)                | 0.72 (0.36, 1.43)               | 1.16 (0.52, 2.60)             | 0.42 (0.06, 3.13) <sup>b</sup>  | 1.54 (0.19, 12.31) <sup>b</sup> |
| Heat illness               | 23                     | 26.85 (3.53, 204.24) <sup>a</sup> | 10.82 (3.12, 37.52) <sup>a</sup> | 8.74 (3.13, 24.44) <sup>a</sup> | 12.15 (4.49, 32.85) <sup>a</sup> | 15.81 (5.70, 43.86) <sup>a</sup> | 9.74 (3.21, 29.58) <sup>a</sup> | 4.08 (0.92, 18.10)            | 9.78 (1.26, 75.88) <sup>a</sup> |                                 |

<sup>a</sup>95% CI does not include the null.

<sup>b</sup>This footnote is to designate that only one ED visit related to the indicated health outcome occurred two days after an exposure (i.e., a day during which the HI exceeded the indicated threshold) during the study period.

Note: Conditional logistic regression models adjusted for daily PM<sub>2.5</sub> concentration were used to estimate odds ratios. Abbreviations: COPD, chronic obstructive pulmonary disease.

Table S2j. Odds ratios and 95% confidence intervals for emergency department (ED) visits among Non-Alaskan Native people for heat index (HI) on lag day 3 above versus below the threshold from single-day lag models in Anchorage, Fairbanks, and the Matanuska-Susitna Valley, Alaska, 2015-2019

| <i>Reason for ED visit</i> | <i>Number of cases</i> | <b>70-degree HI threshold</b>    | <b>72-degree HI threshold</b>    | <b>74-degree HI threshold</b>   | <b>76-degree HI threshold</b>  | <b>78-degree HI threshold</b>   | <b>80-degree HI threshold</b> | <b>82-degree HI threshold</b>  | <b>84-degree HI threshold</b>   | <b>86-degree HI threshold</b>  |
|----------------------------|------------------------|----------------------------------|----------------------------------|---------------------------------|--------------------------------|---------------------------------|-------------------------------|--------------------------------|---------------------------------|--------------------------------|
| Asthma                     | 1907                   | 0.95 (0.86, 1.05)                | 0.96 (0.86, 1.07)                | 0.96 (0.85, 1.08)               | 0.99 (0.87, 1.13)              | 1.00 (0.85, 1.17)               | 1.03 (0.84, 1.27)             | 0.82 (0.60, 1.11)              | 0.68 (0.39, 1.16)               | 0.24 (0.03, 1.72) <sup>b</sup> |
| COPD                       | 1627                   | 0.88 (0.79, 0.98) <sup>a</sup>   | 0.96 (0.85, 1.08)                | 0.84 (0.73, 0.96) <sup>a</sup>  | 0.83 (0.71, 0.97) <sup>a</sup> | 0.80 (0.66, 0.97) <sup>a</sup>  | 0.78 (0.60, 1.02)             | 0.65 (0.44, 0.97) <sup>a</sup> | 0.55 (0.27, 1.13)               | 0.42 (0.06, 3.08) <sup>b</sup> |
| Pneumonia                  | 1372                   | 0.93 (0.83, 1.06)                | 0.90 (0.79, 1.03)                | 0.94 (0.81, 1.08)               | 0.93 (0.79, 1.10)              | 0.96 (0.79, 1.18)               | 1.10 (0.85, 1.42)             | 1.13 (0.80, 1.60)              | 1.14 (0.66, 1.96)               |                                |
| Bronchitis                 | 1301                   | 0.77 (0.68, 0.87) <sup>a</sup>   | 0.72 (0.63, 0.83) <sup>a</sup>   | 0.73 (0.63, 0.86) <sup>a</sup>  | 0.72 (0.60, 0.86) <sup>a</sup> | 0.72 (0.58, 0.90) <sup>a</sup>  | 0.76 (0.57, 1.02)             | 0.78 (0.51, 1.18)              | 0.62 (0.29, 1.34)               | 0.90 (0.21, 3.76)              |
| Arrhythmia                 | 1325                   | 0.92 (0.82, 1.04)                | 0.91 (0.80, 1.04)                | 0.89 (0.77, 1.03)               | 0.88 (0.74, 1.04)              | 0.92 (0.75, 1.12)               | 1.12 (0.87, 1.45)             | 1.19 (0.84, 1.68)              | 1.04 (0.59, 1.83)               | 0.60 (0.14, 2.47)              |
| Cerebrovascular            | 350                    | 0.93 (0.73, 1.19)                | 0.94 (0.73, 1.22)                | 0.91 (0.68, 1.21)               | 0.85 (0.61, 1.19)              | 0.66 (0.42, 1.02)               | 0.61 (0.34, 1.11)             | 0.52 (0.21, 1.30)              |                                 |                                |
| Ischemic                   | 156                    | 1.13 (0.79, 1.62)                | 0.97 (0.66, 1.42)                | 0.87 (0.56, 1.34)               | 0.93 (0.57, 1.52)              | 0.90 (0.50, 1.64)               | 0.84 (0.38, 1.85)             | 1.28 (0.47, 3.49)              | 1.96 (0.57, 6.79)               |                                |
| Myocardial infarction      | 55                     | 1.43 (0.76, 2.68)                | 1.41 (0.72, 2.75)                | 1.55 (0.75, 3.24)               | 1.44 (0.61, 3.40)              | 0.89 (0.25, 3.22)               | 1.22 (0.23, 6.35)             | 3.38 (0.51, 22.57)             | 1.92 (0.19, 19.02) <sup>b</sup> |                                |
| Heart failure              | 286                    | 0.84 (0.65, 1.09)                | 0.87 (0.65, 1.16)                | 0.90 (0.65, 1.23)               | 0.97 (0.68, 1.39)              | 0.82 (0.51, 1.29)               | 0.82 (0.43, 1.54)             | 0.81 (0.32, 2.06)              | 0.86 (0.20, 3.64)               |                                |
| Heat illness               | 23                     | 12.48 (2.87, 54.23) <sup>a</sup> | 10.98 (3.18, 37.91) <sup>a</sup> | 6.51 (2.44, 17.41) <sup>a</sup> | 3.18 (1.28, 7.86) <sup>a</sup> | 4.34 (1.63, 11.55) <sup>a</sup> | 1.64 (0.41, 6.46)             | 1.45 (0.29, 7.24)              | 3.02 (0.34, 27.11) <sup>b</sup> |                                |

<sup>a</sup> 95% CI does not include the null.

<sup>b</sup> This footnote is to designate that only one ED visit related to the indicated health outcome occurred three days after an exposure (i.e., a day during which the HI exceeded the indicated threshold) during the study period.

Note: Conditional logistic regression models adjusted for daily PM<sub>2.5</sub> concentration were used to estimate odds ratios. Abbreviations: COPD, chronic obstructive pulmonary disease.

Table S2k. Odds ratios and 95% confidence intervals for emergency department (ED) visits among Non-Alaskan Native people for heat index (HI) on lag day 4 above versus below the threshold from single-day lag models in Anchorage, Fairbanks, and the Matanuska-Susitna Valley, Alaska, 2015-2019

| <i>Reason for ED visit</i> | <i>Number of cases</i> | <b>70-degree HI threshold</b>   | <b>72-degree HI threshold</b>  | <b>74-degree HI threshold</b>  | <b>76-degree HI threshold</b>  | <b>78-degree HI threshold</b>  | <b>80-degree HI threshold</b>   | <b>82-degree HI threshold</b> | <b>84-degree HI threshold</b>   | <b>86-degree HI threshold</b>  |
|----------------------------|------------------------|---------------------------------|--------------------------------|--------------------------------|--------------------------------|--------------------------------|---------------------------------|-------------------------------|---------------------------------|--------------------------------|
| Asthma                     | 1907                   | 0.91 (0.83, 1.01)               | 0.92 (0.82, 1.02)              | 0.93 (0.82, 1.05)              | 0.93 (0.81, 1.07)              | 1.05 (0.89, 1.23)              | 1.12 (0.91, 1.38)               | 1.06 (0.80, 1.41)             | 0.73 (0.41, 1.29)               | 0.35 (0.05, 2.53) <sup>b</sup> |
| COPD                       | 1627                   | 0.89 (0.80, 0.99) <sup>a</sup>  | 0.89 (0.79, 1.00) <sup>a</sup> | 0.90 (0.79, 1.02)              | 0.90 (0.78, 1.05)              | 0.80 (0.66, 0.97) <sup>a</sup> | 0.81 (0.62, 1.05)               | 0.79 (0.54, 1.14)             | 0.81 (0.45, 1.47)               | 0.33 (0.04, 2.38) <sup>b</sup> |
| Pneumonia                  | 1372                   | 0.89 (0.78, 1.00)               | 0.90 (0.79, 1.03)              | 0.89 (0.77, 1.04)              | 0.90 (0.76, 1.06)              | 0.91 (0.74, 1.11)              | 0.86 (0.65, 1.13)               | 0.86 (0.58, 1.26)             | 0.69 (0.33, 1.42)               | 0.44 (0.06, 3.24) <sup>b</sup> |
| Bronchitis                 | 1301                   | 0.68 (0.60, 0.78) <sup>a</sup>  | 0.70 (0.61, 0.81) <sup>a</sup> | 0.74 (0.63, 0.86) <sup>a</sup> | 0.74 (0.62, 0.89) <sup>a</sup> | 0.72 (0.58, 0.90) <sup>a</sup> | 0.76 (0.56, 1.03)               | 0.65 (0.41, 1.03)             | 0.72 (0.33, 1.56)               | 0.80 (0.19, 3.37)              |
| Arrhythmia                 | 1325                   | 0.91 (0.80, 1.03)               | 0.91 (0.79, 1.03)              | 0.89 (0.77, 1.03)              | 0.93 (0.78, 1.09)              | 0.89 (0.73, 1.09)              | 1.10 (0.85, 1.43)               | 1.22 (0.86, 1.71)             | 1.34 (0.78, 2.31)               | 1.21 (0.37, 3.96)              |
| Cerebrovascular            | 350                    | 0.96 (0.76, 1.23)               | 0.87 (0.67, 1.13)              | 0.91 (0.68, 1.21)              | 0.81 (0.58, 1.13)              | 0.75 (0.50, 1.14)              | 0.53 (0.29, 0.98) <sup>a</sup>  | 0.60 (0.26, 1.41)             | 0.81 (0.25, 2.65)               |                                |
| Ischemic                   | 156                    | 0.92 (0.64, 1.33)               | 1.09 (0.74, 1.60)              | 1.13 (0.74, 1.72)              | 1.14 (0.71, 1.83)              | 1.14 (0.64, 2.03)              | 0.97 (0.47, 2.03)               | 1.22 (0.50, 3.00)             | 0.50 (0.07, 3.75) <sup>b</sup>  |                                |
| Myocardial infarction      | 55                     | 1.32 (0.70, 2.49)               | 1.59 (0.81, 3.13)              | 1.87 (0.90, 3.90)              | 2.98 (1.34, 6.61) <sup>a</sup> | 2.42 (0.93, 6.29)              | 0.87 (0.17, 4.36)               | 1.82 (0.32, 10.27)            |                                 |                                |
| Heart failure              | 286                    | 0.97 (0.75, 1.26)               | 0.74 (0.55, 0.99) <sup>a</sup> | 0.83 (0.60, 1.14)              | 0.61 (0.41, 0.92) <sup>a</sup> | 0.76 (0.47, 1.22)              | 0.99 (0.55, 1.78)               | 0.60 (0.23, 1.55)             | 0.38 (0.05, 2.78) <sup>b</sup>  | 1.01 (0.13, 7.75) <sup>b</sup> |
| Heat illness               | 23                     | 4.88 (1.62, 14.74) <sup>a</sup> | 1.87 (0.78, 4.49)              | 2.90 (1.16, 7.21) <sup>a</sup> | 2.11 (0.83, 5.36)              | 2.72 (0.94, 7.90)              | 3.69 (1.23, 11.12) <sup>a</sup> | 3.79 (0.97, 14.84)            | 6.01 (1.42, 25.45) <sup>a</sup> |                                |

<sup>a</sup>95% CI does not include the null.

<sup>b</sup>This footnote is to designate that only one ED visit related to the indicated health outcome occurred four days after an exposure (i.e., a day during which the HI exceeded the indicated threshold) during the study period.

Note: Conditional logistic regression models adjusted for daily PM<sub>2.5</sub> concentration were used to estimate odds ratios. Abbreviations: COPD, chronic obstructive pulmonary disease.

Table S21. Odds ratios and 95% confidence intervals for emergency department (ED) visits among Non-Alaskan Native people for heat index (HI) on lag day 5 above versus below the threshold from single-day lag models in Anchorage, Fairbanks, and the Matanuska-Susitna Valley, Alaska, 2015-2019

| <i>Reason for ED visit</i> | <i>Number of cases</i> | <b>70-degree HI threshold</b>   | <b>72-degree HI threshold</b>  | <b>74-degree HI threshold</b>  | <b>76-degree HI threshold</b>  | <b>78-degree HI threshold</b>   | <b>80-degree HI threshold</b>   | <b>82-degree HI threshold</b>   | <b>84-degree HI threshold</b>  | <b>86-degree HI threshold</b>   |
|----------------------------|------------------------|---------------------------------|--------------------------------|--------------------------------|--------------------------------|---------------------------------|---------------------------------|---------------------------------|--------------------------------|---------------------------------|
| Asthma                     | 1907                   | 0.96 (0.87, 1.06)               | 0.92 (0.82, 1.02)              | 0.94 (0.83, 1.06)              | 0.98 (0.86, 1.12)              | 1.04 (0.89, 1.22)               | 1.00 (0.81, 1.25)               | 1.11 (0.83, 1.47)               | 0.44 (0.21, 0.90) <sup>a</sup> |                                 |
| COPD                       | 1627                   | 0.92 (0.82, 1.03)               | 0.87 (0.77, 0.98) <sup>a</sup> | 0.88 (0.77, 1.01)              | 0.83 (0.71, 0.96) <sup>a</sup> | 0.80 (0.66, 0.97) <sup>a</sup>  | 0.87 (0.67, 1.11)               | 0.70 (0.48, 1.01)               | 0.84 (0.46, 1.52)              | 2.52 (1.04, 6.12) <sup>a</sup>  |
| Pneumonia                  | 1372                   | 0.95 (0.84, 1.07)               | 0.89 (0.78, 1.01)              | 0.91 (0.79, 1.05)              | 0.91 (0.77, 1.08)              | 0.92 (0.75, 1.12)               | 0.62 (0.45, 0.85) <sup>a</sup>  | 0.65 (0.42, 0.99) <sup>a</sup>  | 0.93 (0.50, 1.73)              | 1.23 (0.29, 5.27)               |
| Bronchitis                 | 1301                   | 0.80 (0.71, 0.91) <sup>a</sup>  | 0.78 (0.68, 0.90) <sup>a</sup> | 0.75 (0.64, 0.87) <sup>a</sup> | 0.72 (0.60, 0.86) <sup>a</sup> | 0.66 (0.53, 0.84) <sup>a</sup>  | 0.69 (0.50, 0.94) <sup>a</sup>  | 0.85 (0.57, 1.27)               | 0.91 (0.48, 1.75)              | 1.57 (0.56, 4.45)               |
| Arrhythmia                 | 1325                   | 0.93 (0.83, 1.06)               | 0.90 (0.79, 1.03)              | 0.95 (0.82, 1.10)              | 0.97 (0.83, 1.15)              | 1.07 (0.89, 1.29)               | 1.22 (0.95, 1.55)               | 1.05 (0.73, 1.49)               | 0.95 (0.54, 1.69)              | 0.71 (0.17, 2.96)               |
| Cerebrovascular            | 350                    | 1.14 (0.90, 1.45)               | 1.13 (0.88, 1.44)              | 1.07 (0.81, 1.40)              | 1.19 (0.88, 1.61)              | 1.07 (0.74, 1.56)               | 0.82 (0.48, 1.38)               | 1.22 (0.64, 2.33)               | 1.35 (0.48, 3.82)              | 1.44 (0.18, 11.42) <sup>b</sup> |
| Ischemic                   | 156                    | 1.15 (0.80, 1.65)               | 1.02 (0.69, 1.51)              | 0.95 (0.61, 1.49)              | 1.35 (0.84, 2.18)              | 1.01 (0.55, 1.83)               | 1.07 (0.52, 2.21)               | 0.57 (0.16, 1.99)               | 0.78 (0.16, 3.83)              |                                 |
| Myocardial infarction      | 55                     | 1.69 (0.90, 3.18)               | 1.65 (0.85, 3.21)              | 1.92 (0.93, 3.97)              | 3.19 (1.43, 7.10) <sup>a</sup> | 1.47 (0.49, 4.37)               | 0.94 (0.17, 5.09)               |                                 |                                |                                 |
| Heart failure              | 286                    | 1.02 (0.79, 1.33)               | 0.95 (0.71, 1.27)              | 0.78 (0.55, 1.10)              | 0.62 (0.41, 0.95) <sup>a</sup> | 0.74 (0.45, 1.22)               | 0.86 (0.43, 1.73)               | 0.64 (0.19, 2.12)               |                                |                                 |
| Heat illness               | 23                     | 4.10 (1.46, 11.47) <sup>a</sup> | 2.13 (0.89, 5.13)              | 3.16 (1.28, 7.78) <sup>a</sup> | 3.68 (1.48, 9.15) <sup>a</sup> | 4.05 (1.53, 10.74) <sup>a</sup> | 6.29 (2.06, 19.19) <sup>a</sup> | 4.80 (1.42, 16.27) <sup>a</sup> | 2.70 (0.53, 13.80)             |                                 |

<sup>a</sup>95% CI does not include the null.

<sup>b</sup>This footnote is to designate that only one ED visit related to the indicated health outcome occurred five days after an exposure (i.e., a day during which the HI exceeded the indicated threshold) during the study period.

Note: Conditional logistic regression models adjusted for daily PM<sub>2.5</sub> concentration were used to estimate odds ratios. Abbreviations: COPD, chronic obstructive pulmonary disease.



Tables S3a-r – Threshold analyses at Lags 0-5, stratified by age

Table S3a. Odds ratios and 95% confidence intervals for emergency department (ED) visits among <15-year-olds for same-day heat index (HI) above versus below the threshold from single-day lag models in Anchorage, Fairbanks, and the Matanuska-Susitna Valley, Alaska, 2015-2019

| <i>Reason for ED visit</i> | <i>Number of cases</i> | <b>70-degree HI threshold</b>  | <b>72-degree HI threshold</b>  | <b>74-degree HI threshold</b> | <b>76-degree HI threshold</b> | <b>78-degree HI threshold</b>     | <b>80-degree HI threshold</b> | <b>82-degree HI threshold</b> | <b>84-degree HI threshold</b>     | <b>86-degree HI threshold</b>   |
|----------------------------|------------------------|--------------------------------|--------------------------------|-------------------------------|-------------------------------|-----------------------------------|-------------------------------|-------------------------------|-----------------------------------|---------------------------------|
| Asthma                     | 523                    | 1.02 (0.84, 1.24)              | 1.07 (0.87, 1.31)              | 0.95 (0.76, 1.20)             | 0.88 (0.68, 1.15)             | 0.92 (0.67, 1.27)                 | 0.85 (0.55, 1.32)             | 0.91 (0.50, 1.67)             | 0.94 (0.33, 2.64)                 | 2.11 (0.24, 18.25) <sup>b</sup> |
| COPD                       | 12                     | 0.72 (0.17, 2.99)              | 1.17 (0.26, 5.27)              | 1.11 (0.19, 6.54)             |                               |                                   |                               |                               |                                   |                                 |
| Pneumonia                  | 330                    | 0.69 (0.53, 0.90) <sup>a</sup> | 0.75 (0.56, 1.00) <sup>a</sup> | 0.84 (0.62, 1.15)             | 0.72 (0.49, 1.05)             | 0.92 (0.59, 1.42)                 | 0.97 (0.52, 1.81)             | 0.98 (0.40, 2.39)             | 1.52 (0.44, 5.28)                 | 2.49 (0.29, 21.09) <sup>b</sup> |
| Bronchitis                 | 402                    | 0.74 (0.58, 0.93) <sup>a</sup> | 0.76 (0.59, 0.97) <sup>a</sup> | 0.77 (0.58, 1.03)             | 0.74 (0.52, 1.03)             | 0.87 (0.58, 1.30)                 | 1.03 (0.59, 1.77)             | 1.07 (0.46, 2.44)             | 1.68 (0.48, 5.83)                 | 3.70 (0.77, 17.77)              |
| Arrhythmia                 | 14                     | 0.74 (0.24, 2.32)              | 0.88 (0.26, 2.99)              | 0.86 (0.22, 3.31)             | 0.90 (0.17, 4.69)             |                                   |                               |                               |                                   |                                 |
| Heat illness               | 6                      |                                | 5.94 (0.63, 55.53)             | 7.25 (0.78, 66.95)            | 5.47 (0.81, 36.85)            | 15.73 (1.39, 178.20) <sup>a</sup> |                               |                               | 15.87 (0.67, 374.56) <sup>b</sup> |                                 |

<sup>a</sup>95% CI does not include the null.

<sup>b</sup>This footnote is to designate that only one ED visit related to the indicated health outcome occurred on an exposed day (i.e., a day during which the HI exceeded the indicated threshold) during the study period.

Note: Conditional logistic regression models adjusted for daily PM<sub>2.5</sub> concentration were used to estimate odds ratios. Abbreviations: COPD, chronic obstructive pulmonary disease.

Table S3b. Odds ratios and 95% confidence intervals for emergency department (ED) visits among <15-year-olds for heat index (HI) on lag day 1 above versus below the threshold from single-day lag models in Anchorage, Fairbanks, and the Matanuska-Susitna Valley, Alaska, 2015-2019

| <i>Reason for ED visit</i> | <i>Number of cases</i> | <b>70-degree HI threshold</b>  | <b>72-degree HI threshold</b>  | <b>74-degree HI threshold</b> | <b>76-degree HI threshold</b>   | <b>78-degree HI threshold</b>     | <b>80-degree HI threshold</b>     | <b>82-degree HI threshold</b>     | <b>84-degree HI threshold</b> | <b>86-degree HI threshold</b>   |
|----------------------------|------------------------|--------------------------------|--------------------------------|-------------------------------|---------------------------------|-----------------------------------|-----------------------------------|-----------------------------------|-------------------------------|---------------------------------|
| Asthma                     | 523                    | 1.04 (0.86, 1.25)              | 1.17 (0.96, 1.43)              | 1.06 (0.85, 1.32)             | 0.94 (0.72, 1.21)               | 0.90 (0.66, 1.24)                 | 0.89 (0.58, 1.37)                 | 1.00 (0.55, 1.81)                 | 0.49 (0.12, 2.10)             |                                 |
| COPD                       | 12                     | 0.67 (0.16, 2.73)              | 0.24 (0.03, 1.98)              |                               |                                 |                                   |                                   |                                   |                               |                                 |
| Pneumonia                  | 330                    | 0.73 (0.57, 0.95) <sup>a</sup> | 0.82 (0.62, 1.08)              | 0.95 (0.70, 1.28)             | 0.98 (0.70, 1.38)               | 1.06 (0.70, 1.59)                 | 1.21 (0.70, 2.09)                 | 1.23 (0.57, 2.67)                 | 1.72 (0.59, 5.07)             | 2.32 (0.28, 19.52) <sup>b</sup> |
| Bronchitis                 | 402                    | 0.74 (0.59, 0.94) <sup>a</sup> | 0.76 (0.59, 0.98) <sup>a</sup> | 0.80 (0.60, 1.06)             | 0.82 (0.59, 1.14)               | 0.94 (0.63, 1.40)                 | 0.74 (0.40, 1.36)                 | 0.92 (0.41, 2.08)                 | 1.99 (0.68, 5.87)             | 1.60 (0.20, 12.81) <sup>b</sup> |
| Arrhythmia                 | 14                     | 0.77 (0.24, 2.47)              | 0.63 (0.16, 2.44)              | 0.59 (0.12, 3.02)             | 0.37 (0.04, 3.20) <sup>b</sup>  | 0.71 (0.07, 6.86) <sup>b</sup>    |                                   |                                   |                               |                                 |
| Heat illness               | 6                      | 9.12 (0.78, 107.01)            | 3.41 (0.52, 22.61)             | 5.67 (0.91, 35.56)            | 8.39 (1.19, 59.22) <sup>a</sup> | 19.17 (1.74, 210.98) <sup>a</sup> | 26.56 (2.46, 286.30) <sup>a</sup> | 12.93 (0.60, 277.26) <sup>b</sup> |                               |                                 |

<sup>a</sup>95% CI does not include the null.

<sup>b</sup>This footnote is to designate that only one ED visit related to the indicated health outcome occurred one day after an exposure (i.e., a day during which the HI exceeded the indicated threshold) during the study period.

Note: Conditional logistic regression models adjusted for daily PM<sub>2.5</sub> concentration were used to estimate odds ratios. Abbreviations: COPD, chronic obstructive pulmonary disease.

Table S3c. Odds ratios and 95% confidence intervals for emergency department (ED) visits among <15-year-olds for heat index (HI) on lag day 2 above versus below the threshold from single-day lag models in Anchorage, Fairbanks, and the Matanuska-Susitna Valley, Alaska, 2015-2019

| <i>Reason for ED visit</i> | <i>Number of cases</i> | <b>70-degree HI threshold</b>  | <b>72-degree HI threshold</b>  | <b>74-degree HI threshold</b>  | <b>76-degree HI threshold</b>   | <b>78-degree HI threshold</b> | <b>80-degree HI threshold</b>   | <b>82-degree HI threshold</b> | <b>84-degree HI threshold</b>  | <b>86-degree HI threshold</b>   |
|----------------------------|------------------------|--------------------------------|--------------------------------|--------------------------------|---------------------------------|-------------------------------|---------------------------------|-------------------------------|--------------------------------|---------------------------------|
| Asthma                     | 523                    | 0.93 (0.77, 1.13)              | 0.91 (0.74, 1.12)              | 0.77 (0.61, 0.98) <sup>a</sup> | 0.83 (0.64, 1.09)               | 0.85 (0.62, 1.18)             | 0.80 (0.51, 1.25)               | 0.86 (0.47, 1.57)             | 0.41 (0.10, 1.70)              | 1.43 (0.18, 11.47) <sup>b</sup> |
| COPD                       | 12                     | 0.96 (0.25, 3.76)              | 0.47 (0.09, 2.43)              | 0.26 (0.03, 2.41)              |                                 |                               |                                 |                               |                                |                                 |
| Pneumonia                  | 330                    | 0.80 (0.62, 1.03)              | 0.67 (0.51, 0.89) <sup>a</sup> | 0.74 (0.54, 1.01)              | 0.92 (0.66, 1.29)               | 1.01 (0.67, 1.51)             | 1.24 (0.73, 2.13)               | 1.24 (0.57, 2.68)             | 0.38 (0.05, 2.92) <sup>b</sup> | 2.14 (0.26, 17.96) <sup>b</sup> |
| Bronchitis                 | 402                    | 0.72 (0.57, 0.91) <sup>a</sup> | 0.81 (0.64, 1.05)              | 0.78 (0.59, 1.04)              | 0.92 (0.67, 1.27)               | 0.88 (0.60, 1.31)             | 0.93 (0.54, 1.59)               | 0.59 (0.23, 1.48)             | 0.38 (0.05, 2.85) <sup>b</sup> |                                 |
| Arrhythmia                 | 14                     | 0.33 (0.09, 1.25)              | 0.56 (0.15, 2.14)              | 0.46 (0.09, 2.23)              | 0.63 (0.13, 3.13)               |                               |                                 |                               |                                |                                 |
| Heat illness               | 6                      |                                | 3.62 (0.59, 22.29)             | 5.65 (0.90, 35.52)             | 7.32 (1.15, 46.61) <sup>a</sup> | 6.15 (0.97, 38.98)            | 3.27 (0.17, 64.20) <sup>b</sup> |                               |                                |                                 |

<sup>a</sup>95% CI does not include the null.

<sup>b</sup>This footnote is to designate that only one ED visit related to the indicated health outcome occurred two days after an exposure (i.e., a day during which the HI exceeded the indicated threshold) during the study period.□

Note: Conditional logistic regression models adjusted for daily PM<sub>2.5</sub> concentration were used to estimate odds ratios. Abbreviations: COPD, chronic obstructive pulmonary disease.

Table S3d. Odds ratios and 95% confidence intervals for emergency department (ED) visits among <15-year-olds for heat index (HI) on lag day 3 above versus below the threshold from single-day lag models in Anchorage, Fairbanks, and the Matanuska-Susitna Valley, Alaska, 2015-2019

| <i>Reason for ED visit</i> | <i>Number of cases</i> | <b>70-degree HI threshold</b>  | <b>72-degree HI threshold</b>  | <b>74-degree HI threshold</b>  | <b>76-degree HI threshold</b>  | <b>78-degree HI threshold</b>   | <b>80-degree HI threshold</b> | <b>82-degree HI threshold</b> | <b>84-degree HI threshold</b> | <b>86-degree HI threshold</b>   |
|----------------------------|------------------------|--------------------------------|--------------------------------|--------------------------------|--------------------------------|---------------------------------|-------------------------------|-------------------------------|-------------------------------|---------------------------------|
| Asthma                     | 523                    | 0.80 (0.65, 0.97) <sup>a</sup> | 0.74 (0.59, 0.91) <sup>a</sup> | 0.79 (0.62, 1.00)              | 0.77 (0.58, 1.01)              | 0.78 (0.55, 1.10)               | 0.84 (0.53, 1.31)             | 0.68 (0.35, 1.33)             | 1.15 (0.45, 2.95)             | 0.92 (0.12, 7.04) <sup>b</sup>  |
| COPD                       | 12                     | 0.18 (0.02, 1.63)              | 0.32 (0.04, 2.79)              |                                |                                |                                 |                               |                               |                               |                                 |
| Pneumonia                  | 330                    | 0.84 (0.65, 1.09)              | 0.75 (0.57, 1.00) <sup>a</sup> | 0.82 (0.60, 1.11)              | 0.80 (0.56, 1.14)              | 0.85 (0.55, 1.32)               | 0.85 (0.46, 1.57)             | 1.03 (0.45, 2.35)             | 1.75 (0.50, 6.10)             |                                 |
| Bronchitis                 | 402                    | 0.73 (0.58, 0.92) <sup>a</sup> | 0.79 (0.61, 1.01)              | 0.80 (0.61, 1.06)              | 0.92 (0.67, 1.26)              | 1.03 (0.71, 1.49)               | 0.94 (0.55, 1.62)             | 1.02 (0.47, 2.21)             | 1.42 (0.42, 4.80)             | 3.32 (0.37, 29.50) <sup>b</sup> |
| Arrhythmia                 | 14                     | 0.49 (0.14, 1.64)              | 0.29 (0.06, 1.37)              | 0.17 (0.02, 1.40) <sup>b</sup> | 0.23 (0.03, 1.92) <sup>b</sup> | 0.43 (0.05, 3.71) <sup>b</sup>  |                               |                               |                               |                                 |
| Heat illness               | 6                      | 2.88 (0.50, 16.76)             | 3.46 (0.59, 20.13)             | 5.88 (0.88, 39.38)             | 1.86 (0.28, 12.26)             | 1.50 (0.14, 16.28) <sup>b</sup> |                               |                               |                               |                                 |

<sup>a</sup>95% CI does not include the null.

<sup>b</sup>This footnote is to designate that only one ED visit related to the indicated health outcome occurred three days after an exposure (i.e., a day during which the HI exceeded the indicated threshold) during the study period.

Note: Conditional logistic regression models adjusted for daily PM<sub>2.5</sub> concentration were used to estimate odds ratios. Abbreviations: COPD, chronic obstructive pulmonary disease.

Table S3e. Odds ratios and 95% confidence intervals for emergency department (ED) visits among <15-year-olds for heat index (HI) on lag day 4 above versus below the threshold from single-day lag models in Anchorage, Fairbanks, and the Matanuska-Susitna Valley, Alaska, 2015-2019

| <i>Reason for ED visit</i> | <i>Number of cases</i> | <b>70-degree HI threshold</b>  | <b>72-degree HI threshold</b>  | <b>74-degree HI threshold</b>  | <b>76-degree HI threshold</b> | <b>78-degree HI threshold</b> | <b>80-degree HI threshold</b> | <b>82-degree HI threshold</b> | <b>84-degree HI threshold</b>  | <b>86-degree HI threshold</b> |
|----------------------------|------------------------|--------------------------------|--------------------------------|--------------------------------|-------------------------------|-------------------------------|-------------------------------|-------------------------------|--------------------------------|-------------------------------|
| Asthma                     | 523                    | 0.69 (0.57, 0.84) <sup>a</sup> | 0.71 (0.57, 0.89) <sup>a</sup> | 0.69 (0.54, 0.89) <sup>a</sup> | 0.76 (0.58, 1.01)             | 0.91 (0.66, 1.26)             | 1.11 (0.73, 1.68)             | 0.93 (0.50, 1.73)             | 0.51 (0.12, 2.12)              |                               |
| COPD                       | 12                     | 0.16 (0.02, 1.36)              |                                |                                |                               |                               |                               |                               |                                |                               |
| Pneumonia                  | 330                    | 0.84 (0.65, 1.09)              | 0.90 (0.69, 1.19)              | 0.91 (0.67, 1.24)              | 0.92 (0.64, 1.31)             | 0.91 (0.59, 1.42)             | 0.73 (0.38, 1.40)             | 0.90 (0.37, 2.18)             | 1.67 (0.49, 5.71)              |                               |
| Bronchitis                 | 402                    | 0.69 (0.54, 0.87) <sup>a</sup> | 0.79 (0.61, 1.01)              | 0.86 (0.65, 1.14)              | 0.79 (0.57, 1.09)             | 0.84 (0.57, 1.24)             | 0.90 (0.52, 1.54)             | 0.67 (0.28, 1.60)             | 0.42 (0.06, 3.16) <sup>b</sup> |                               |
| Arrhythmia                 | 14                     | 0.41 (0.11, 1.54)              | 0.40 (0.08, 1.93)              | 0.25 (0.03, 2.02)              |                               |                               |                               |                               |                                |                               |
| Heat illness               | 6                      | 5.67 (0.61, 52.56)             | 0.62 (0.09, 4.19)              | 0.93 (0.13, 6.59)              | 1.72 (0.23, 13.01)            | 3.70 (0.45, 30.43)            | 4.63 (0.55, 38.94)            |                               |                                |                               |

<sup>a</sup> 95% CI does not include the null.

<sup>b</sup> This footnote is to designate that only one ED visit related to the indicated health outcome occurred four days after an exposure (i.e., a day during which the HI exceeded the indicated threshold) during the study period.

Note: Conditional logistic regression models adjusted for daily PM<sub>2.5</sub> concentration were used to estimate odds ratios. Abbreviations: COPD, chronic obstructive pulmonary disease.

Table S3f. Odds ratios and 95% confidence intervals for emergency department (ED) visits among <15-year-olds for heat index (HI) on lag day 5 above versus below the threshold from single-day lag models in Anchorage, Fairbanks, and the Matanuska-Susitna Valley, Alaska, 2015-2019

| <i>Reason for ED visit</i> | <i>Number of cases</i> | <b>70-degree HI threshold</b>        | <b>72-degree HI threshold</b>        | <b>74-degree HI threshold</b>        | <b>76-degree HI threshold</b> | <b>78-degree HI threshold</b> | <b>80-degree HI threshold</b> | <b>82-degree HI threshold</b> | <b>84-degree HI threshold</b> | <b>86-degree HI threshold</b> |
|----------------------------|------------------------|--------------------------------------|--------------------------------------|--------------------------------------|-------------------------------|-------------------------------|-------------------------------|-------------------------------|-------------------------------|-------------------------------|
| Asthma                     | 523                    | <b>0.74 (0.61, 0.90)<sup>a</sup></b> | <b>0.79 (0.64, 0.98)<sup>a</sup></b> | 0.83 (0.66, 1.05)                    | 0.84 (0.64, 1.10)             | 0.88 (0.64, 1.22)             | 0.80 (0.50, 1.29)             | 0.72 (0.38, 1.38)             |                               |                               |
| COPD                       | 12                     | 0.15 (0.02, 1.22)                    |                                      |                                      |                               |                               |                               |                               |                               |                               |
| Pneumonia                  | 330                    | 0.94 (0.73, 1.20)                    | 0.87 (0.66, 1.14)                    | 0.77 (0.56, 1.04)                    | 0.75 (0.52, 1.08)             | 0.70 (0.44, 1.11)             | 0.74 (0.40, 1.40)             | 0.70 (0.30, 1.67)             | 0.92 (0.22, 3.97)             |                               |
| Bronchitis                 | 402                    | <b>0.73 (0.58, 0.92)<sup>a</sup></b> | <b>0.68 (0.53, 0.89)<sup>a</sup></b> | <b>0.67 (0.50, 0.90)<sup>a</sup></b> | 0.82 (0.60, 1.13)             | 0.89 (0.61, 1.30)             | 0.79 (0.45, 1.38)             | 0.92 (0.43, 1.98)             | 1.61 (0.55, 4.71)             |                               |
| Arrhythmia                 | 14                     | 0.39 (0.10, 1.47)                    | 0.37 (0.08, 1.72)                    |                                      |                               |                               |                               |                               |                               |                               |
| Heat illness               | 6                      | 1.13 (0.22, 5.90)                    | 0.65 (0.11, 3.72)                    | 0.88 (0.15, 5.30)                    | 1.59 (0.24, 10.33)            | 2.74 (0.37, 20.01)            | 3.83 (0.44, 33.02)            |                               |                               |                               |

<sup>a</sup>95% CI does not include the null.

Note: Conditional logistic regression models adjusted for daily PM<sub>2.5</sub> concentration were used to estimate odds ratios. Abbreviations: COPD, chronic obstructive pulmonary disease.

Table S3g. Odds ratios and 95% confidence intervals for emergency department (ED) visits among 15-65 year-olds for same-day heat index (HI) above versus below the threshold from single-day lag models in Anchorage, Fairbanks, and the Matanuska-Susitna Valley, Alaska, 2015-2019

| <i>Reason for ED visit</i> | <i>Number of cases</i> | <b>70-degree HI threshold</b>   | <b>72-degree HI threshold</b>    | <b>74-degree HI threshold</b>    | <b>76-degree HI threshold</b>    | <b>78-degree HI threshold</b>    | <b>80-degree HI threshold</b>     | <b>82-degree HI threshold</b>    | <b>84-degree HI threshold</b>   | <b>86-degree HI threshold</b>   |
|----------------------------|------------------------|---------------------------------|----------------------------------|----------------------------------|----------------------------------|----------------------------------|-----------------------------------|----------------------------------|---------------------------------|---------------------------------|
| Asthma                     | 2217                   | 0.98 (0.90, 1.08)               | 0.99 (0.90, 1.09)                | 1.01 (0.91, 1.13)                | 1.04 (0.92, 1.18)                | 1.06 (0.92, 1.22)                | 1.11 (0.92, 1.34)                 | 1.08 (0.84, 1.40)                | 0.91 (0.58, 1.44)               | 0.47 (0.06, 3.48) <sup>b</sup>  |
| COPD                       | 1293                   | 0.89 (0.79, 1.01)               | 0.91 (0.80, 1.04)                | 0.93 (0.80, 1.07)                | 0.93 (0.78, 1.10)                | 0.88 (0.72, 1.09)                | 0.67 (0.48, 0.92) <sup>a</sup>    | 0.50 (0.30, 0.84) <sup>a</sup>   | 0.61 (0.27, 1.41)               |                                 |
| Pneumonia                  | 1231                   | 0.98 (0.86, 1.11)               | 1.00 (0.88, 1.15)                | 0.96 (0.83, 1.12)                | 1.02 (0.86, 1.21)                | 1.16 (0.95, 1.41)                | 1.47 (1.13, 1.91) <sup>a</sup>    | 1.41 (0.97, 2.04)                | 1.10 (0.55, 2.20)               | 2.06 (0.61, 6.98)               |
| Bronchitis                 | 1294                   | 0.75 (0.66, 0.85) <sup>a</sup>  | 0.82 (0.72, 0.94) <sup>a</sup>   | 0.78 (0.67, 0.91) <sup>a</sup>   | 0.75 (0.63, 0.90) <sup>a</sup>   | 0.67 (0.53, 0.84) <sup>a</sup>   | 0.73 (0.54, 0.98) <sup>a</sup>    | 0.57 (0.36, 0.90) <sup>a</sup>   | 0.90 (0.47, 1.74)               | 1.60 (0.56, 4.56)               |
| Arrhythmia                 | 879                    | 0.98 (0.85, 1.14)               | 1.07 (0.92, 1.26)                | 1.06 (0.89, 1.27)                | 0.94 (0.76, 1.15)                | 0.93 (0.72, 1.19)                | 0.87 (0.61, 1.23)                 | 0.94 (0.57, 1.56)                | 0.70 (0.25, 1.93)               |                                 |
| Cerebrovascular            | 211                    | 0.87 (0.64, 1.20)               | 0.88 (0.63, 1.24)                | 0.98 (0.69, 1.40)                | 1.19 (0.80, 1.77)                | 1.01 (0.62, 1.65)                | 0.68 (0.32, 1.45)                 | 0.47 (0.14, 1.61)                | 0.88 (0.20, 3.92)               | 2.67 (0.31, 23.21) <sup>b</sup> |
| Ischemic                   | 100                    | 1.21 (0.78, 1.89)               | 1.21 (0.75, 1.96)                | 1.51 (0.92, 2.49)                | 1.92 (1.12, 3.29) <sup>a</sup>   | 1.93 (1.01, 3.66) <sup>a</sup>   | 3.19 (1.34, 7.62) <sup>a</sup>    | 2.42 (0.73, 7.96)                |                                 |                                 |
| Myocardial infarction      | 53                     | 1.18 (0.64, 2.18)               | 1.32 (0.69, 2.55)                | 1.95 (1.00, 3.79)                | 2.45 (1.19, 5.03) <sup>a</sup>   | 2.81 (1.18, 6.68) <sup>a</sup>   | 4.21 (1.27, 13.99) <sup>a</sup>   | 1.03 (0.08, 13.84) <sup>b</sup>  |                                 |                                 |
| Heart failure              | 241                    | 0.77 (0.57, 1.03)               | 0.69 (0.49, 0.95) <sup>a</sup>   | 0.83 (0.59, 1.19)                | 0.99 (0.67, 1.46)                | 0.84 (0.52, 1.37)                | 0.65 (0.32, 1.34)                 | 0.22 (0.05, 1.00)                | 0.98 (0.22, 4.37)               |                                 |
| Heat illness               | 27                     | 8.98 (2.64, 30.54) <sup>a</sup> | 12.91 (3.77, 44.20) <sup>a</sup> | 11.96 (3.92, 36.50) <sup>a</sup> | 19.54 (6.38, 59.91) <sup>a</sup> | 14.44 (5.27, 39.53) <sup>a</sup> | 32.51 (9.00, 117.46) <sup>a</sup> | 10.98 (3.40, 35.45) <sup>a</sup> | 6.81 (1.98, 23.42) <sup>a</sup> |                                 |

<sup>a</sup>95% CI does not include the null.

<sup>b</sup>This footnote is to designate that only one ED visit related to the indicated health outcome occurred on an exposed day (i.e., a day during which the HI exceeded the indicated threshold) during the study period.

Note: Conditional logistic regression models adjusted for daily PM<sub>2.5</sub> concentration were used to estimate odds ratios. Abbreviations: COPD, chronic obstructive pulmonary disease.

Table S3h. Odds ratios and 95% confidence intervals for emergency department (ED) visits among 15-65 year-olds for heat index (HI) on lag day 1 above versus below the threshold from single-day lag models in Anchorage, Fairbanks, and the Matanuska-Susitna Valley, Alaska, 2015-2019

| <i>Reason for ED visit</i> | <i>Number of cases</i> | <b>70-degree HI threshold</b>    | <b>72-degree HI threshold</b>   | <b>74-degree HI threshold</b>   | <b>76-degree HI threshold</b>    | <b>78-degree HI threshold</b>    | <b>80-degree HI threshold</b>    | <b>82-degree HI threshold</b>    | <b>84-degree HI threshold</b>     | <b>86-degree HI threshold</b>    |
|----------------------------|------------------------|----------------------------------|---------------------------------|---------------------------------|----------------------------------|----------------------------------|----------------------------------|----------------------------------|-----------------------------------|----------------------------------|
| Asthma                     | 2217                   | 0.98 (0.90, 1.08)                | 1.03 (0.93, 1.14)               | 1.04 (0.93, 1.16)               | 1.07 (0.94, 1.20)                | 1.10 (0.96, 1.27)                | 1.16 (0.96, 1.40)                | 1.23 (0.96, 1.57)                | 1.18 (0.77, 1.81)                 | 1.03 (0.37, 2.89)                |
| COPD                       | 1293                   | 0.92 (0.81, 1.04)                | 0.95 (0.83, 1.08)               | 0.92 (0.79, 1.07)               | 0.91 (0.77, 1.08)                | 0.79 (0.64, 0.98) <sup>a</sup>   | 0.61 (0.44, 0.86) <sup>a</sup>   | 0.59 (0.37, 0.95) <sup>a</sup>   | 0.42 (0.15, 1.15)                 | 0.79 (0.10, 5.98) <sup>b</sup>   |
| Pneumonia                  | 1231                   | 0.91 (0.80, 1.04)                | 0.92 (0.80, 1.06)               | 0.92 (0.79, 1.07)               | 0.92 (0.77, 1.10)                | 1.09 (0.88, 1.33)                | 1.20 (0.91, 1.57)                | 1.43 (1.00, 2.05) <sup>a</sup>   | 1.57 (0.90, 2.73)                 | 0.72 (0.10, 5.41) <sup>b</sup>   |
| Bronchitis                 | 1294                   | 0.78 (0.69, 0.88) <sup>a</sup>   | 0.83 (0.72, 0.95) <sup>a</sup>  | 0.81 (0.70, 0.94) <sup>a</sup>  | 0.78 (0.65, 0.93) <sup>a</sup>   | 0.78 (0.63, 0.97) <sup>a</sup>   | 0.78 (0.58, 1.05)                | 0.83 (0.55, 1.24)                | 0.82 (0.43, 1.58)                 | 0.92 (0.28, 2.98)                |
| Arrhythmia                 | 879                    | 1.11 (0.95, 1.28)                | 1.07 (0.91, 1.25)               | 1.01 (0.85, 1.20)               | 1.00 (0.82, 1.23)                | 1.10 (0.86, 1.39)                | 0.88 (0.61, 1.26)                | 0.93 (0.57, 1.51)                | 1.80 (0.87, 3.71)                 | 3.62 (1.00, 13.17)               |
| Cerebrovascular            | 211                    | 0.79 (0.58, 1.08)                | 0.69 (0.48, 0.97) <sup>a</sup>  | 0.73 (0.50, 1.07)               | 0.94 (0.62, 1.41)                | 0.87 (0.53, 1.43)                | 0.93 (0.49, 1.76)                | 0.53 (0.18, 1.55)                | 0.35 (0.05, 2.58) <sup>b</sup>    |                                  |
| Ischemic                   | 100                    | 1.30 (0.84, 2.01)                | 1.55 (0.97, 2.46)               | 1.43 (0.87, 2.36)               | 1.42 (0.80, 2.50)                | 1.40 (0.69, 2.86)                | 2.15 (0.89, 5.21)                | 1.41 (0.36, 5.55)                | 1.92 (0.23, 15.96) <sup>b</sup>   |                                  |
| Myocardial infarction      | 53                     | 1.36 (0.75, 2.46)                | 1.37 (0.70, 2.65)               | 1.49 (0.73, 3.05)               | 1.71 (0.79, 3.70)                | 1.55 (0.54, 4.44)                | 2.87 (0.78, 10.51)               | 3.13 (0.72, 13.61)               | 2.78 (0.31, 25.19) <sup>b</sup>   |                                  |
| Heart failure              | 241                    | 0.75 (0.55, 1.00)                | 0.78 (0.57, 1.08)               | 0.80 (0.56, 1.14)               | 0.88 (0.60, 1.30)                | 0.94 (0.60, 1.50)                | 0.77 (0.39, 1.53)                | 1.08 (0.45, 2.57)                | 0.91 (0.20, 4.16)                 | 10.48 (1.36, 80.84) <sup>a</sup> |
| Heat illness               | 27                     | 14.18 (3.31, 60.64) <sup>a</sup> | 9.55 (3.22, 28.34) <sup>a</sup> | 7.36 (2.88, 18.80) <sup>a</sup> | 12.42 (4.80, 32.16) <sup>a</sup> | 10.45 (4.26, 25.63) <sup>a</sup> | 13.81 (5.02, 37.96) <sup>a</sup> | 10.25 (3.23, 32.54) <sup>a</sup> | 18.00 (3.01, 107.73) <sup>a</sup> |                                  |

<sup>a</sup> 95% CI does not include the null.

<sup>b</sup> This footnote is to designate that only one ED visit related to the indicated health outcome occurred one day after an exposure (i.e., a day during which the HI exceeded the indicated threshold) during the study period.

Note: Conditional logistic regression models adjusted for daily PM<sub>2.5</sub> concentration were used to estimate odds ratios. Abbreviations: COPD, chronic obstructive pulmonary disease.



Table S3i. Odds ratios and 95% confidence intervals for emergency department (ED) visits among 15-65 year-olds for heat index (HI) on lag day 2 above versus below the threshold from single-day lag models in Anchorage, Fairbanks, and the Matanuska-Susitna Valley, Alaska, 2015-2019

| <i>Reason for ED visit</i> | <i>Number of cases</i> | <b>70-degree HI threshold</b>   | <b>72-degree HI threshold</b>  | <b>74-degree HI threshold</b>  | <b>76-degree HI threshold</b>  | <b>78-degree HI threshold</b>   | <b>80-degree HI threshold</b>   | <b>82-degree HI threshold</b>   | <b>84-degree HI threshold</b>     | <b>86-degree HI threshold</b>  |
|----------------------------|------------------------|---------------------------------|--------------------------------|--------------------------------|--------------------------------|---------------------------------|---------------------------------|---------------------------------|-----------------------------------|--------------------------------|
| Asthma                     | 2217                   | 0.99 (0.90, 1.09)               | 1.04 (0.94, 1.15)              | 1.00 (0.90, 1.12)              | 1.08 (0.95, 1.21)              | 1.03 (0.89, 1.19)               | 1.08 (0.89, 1.31)               | 1.02 (0.78, 1.35)               | 0.94 (0.59, 1.52)                 | 0.64 (0.15, 2.65)              |
| COPD                       | 1293                   | 0.86 (0.76, 0.97) <sup>a</sup>  | 0.88 (0.77, 1.01)              | 0.87 (0.75, 1.01)              | 0.79 (0.66, 0.95) <sup>a</sup> | 0.75 (0.60, 0.94) <sup>a</sup>  | 0.75 (0.55, 1.03)               | 0.71 (0.45, 1.12)               | 0.71 (0.33, 1.54)                 | 0.67 (0.09, 5.02) <sup>b</sup> |
| Pneumonia                  | 1231                   | 0.88 (0.77, 1.00)               | 0.94 (0.81, 1.08)              | 0.92 (0.79, 1.08)              | 1.01 (0.84, 1.21)              | 1.17 (0.95, 1.44)               | 1.37 (1.05, 1.80) <sup>a</sup>  | 1.45 (0.99, 2.11)               | 1.18 (0.59, 2.37)                 | 0.49 (0.07, 3.63) <sup>b</sup> |
| Bronchitis                 | 1294                   | 0.78 (0.69, 0.89) <sup>a</sup>  | 0.84 (0.73, 0.96) <sup>a</sup> | 0.78 (0.67, 0.91) <sup>a</sup> | 0.77 (0.65, 0.93) <sup>a</sup> | 0.78 (0.62, 0.97) <sup>a</sup>  | 0.87 (0.65, 1.17)               | 0.84 (0.55, 1.28)               | 0.44 (0.18, 1.08)                 | 0.91 (0.28, 2.94)              |
| Arrhythmia                 | 879                    | 1.17 (1.01, 1.36) <sup>a</sup>  | 1.05 (0.90, 1.23)              | 1.04 (0.87, 1.23)              | 1.01 (0.82, 1.24)              | 1.04 (0.82, 1.33)               | 0.87 (0.62, 1.23)               | 0.95 (0.59, 1.51)               | 1.04 (0.47, 2.29)                 | 1.28 (0.30, 5.51)              |
| Cerebrovascular            | 211                    | 0.92 (0.68, 1.26)               | 0.88 (0.63, 1.22)              | 1.03 (0.72, 1.46)              | 0.87 (0.57, 1.32)              | 0.88 (0.53, 1.46)               | 1.20 (0.67, 2.18)               | 0.63 (0.22, 1.79)               | 0.47 (0.06, 3.49) <sup>b</sup>    | 1.09 (0.14, 8.48) <sup>b</sup> |
| Ischemic                   | 100                    | 1.69 (1.10, 2.59) <sup>a</sup>  | 2.05 (1.33, 3.16) <sup>a</sup> | 1.62 (1.00, 2.61) <sup>a</sup> | 1.69 (0.98, 2.90)              | 1.50 (0.77, 2.92)               | 1.52 (0.59, 3.94)               | 1.35 (0.35, 5.17)               |                                   |                                |
| Myocardial infarction      | 53                     | 1.65 (0.92, 2.98)               | 2.22 (1.22, 4.04) <sup>a</sup> | 2.13 (1.10, 4.11) <sup>a</sup> | 1.84 (0.85, 3.95)              | 2.28 (0.93, 5.61)               | 2.87 (0.85, 9.68)               | 2.72 (0.54, 13.80)              |                                   |                                |
| Heart failure              | 241                    | 0.77 (0.58, 1.04)               | 0.88 (0.65, 1.21)              | 0.81 (0.57, 1.14)              | 0.88 (0.60, 1.30)              | 0.85 (0.53, 1.37)               | 0.75 (0.36, 1.53)               | 0.85 (0.33, 2.18)               |                                   |                                |
| Heat illness               | 27                     | 4.36 (1.62, 11.75) <sup>a</sup> | 4.08 (1.67, 9.93) <sup>a</sup> | 3.23 (1.44, 7.23) <sup>a</sup> | 4.22 (1.86, 9.55) <sup>a</sup> | 5.79 (2.42, 13.87) <sup>a</sup> | 7.27 (2.61, 20.28) <sup>a</sup> | 6.94 (1.49, 32.29) <sup>a</sup> | 20.76 (1.78, 242.44) <sup>a</sup> |                                |

<sup>a</sup>95% CI does not include the null.

<sup>b</sup>This footnote is to designate that only one ED visit related to the indicated health outcome occurred two days after an exposure (i.e., a day during which the HI exceeded the indicated threshold) during the study period.

Note: Conditional logistic regression models adjusted for daily PM<sub>2.5</sub> concentration were used to estimate odds ratios. Abbreviations: COPD, chronic obstructive pulmonary disease.

Table S3j. Odds ratios and 95% confidence intervals for emergency department (ED) visits among 15-65 year-olds for heat index (HI) on lag day 3 above versus below the threshold from single-day lag models in Anchorage, Fairbanks, and the Matanuska-Susitna Valley, Alaska, 2015-2019

| <i>Reason for ED visit</i> | <i>Number of cases</i> | <b>70-degree HI threshold</b>  | <b>72-degree HI threshold</b>  | <b>74-degree HI threshold</b>  | <b>76-degree HI threshold</b>  | <b>78-degree HI threshold</b>  | <b>80-degree HI threshold</b>   | <b>82-degree HI threshold</b>   | <b>84-degree HI threshold</b>   | <b>86-degree HI threshold</b>   |
|----------------------------|------------------------|--------------------------------|--------------------------------|--------------------------------|--------------------------------|--------------------------------|---------------------------------|---------------------------------|---------------------------------|---------------------------------|
| Asthma                     | 2217                   | 0.96 (0.88, 1.06)              | 0.97 (0.88, 1.07)              | 0.98 (0.88, 1.09)              | 1.03 (0.91, 1.17)              | 1.01 (0.87, 1.18)              | 0.99 (0.81, 1.21)               | 0.93 (0.70, 1.24)               | 0.81 (0.49, 1.35)               |                                 |
| COPD                       | 1293                   | 0.87 (0.77, 0.99) <sup>a</sup> | 0.93 (0.82, 1.06)              | 0.85 (0.74, 0.99) <sup>a</sup> | 0.85 (0.71, 1.02)              | 0.79 (0.64, 0.99) <sup>a</sup> | 0.67 (0.49, 0.93) <sup>a</sup>  | 0.59 (0.36, 0.95) <sup>a</sup>  | 0.55 (0.24, 1.27)               | 1.23 (0.29, 5.30)               |
| Pneumonia                  | 1231                   | 0.94 (0.82, 1.07)              | 0.94 (0.82, 1.08)              | 0.90 (0.77, 1.05)              | 0.90 (0.75, 1.08)              | 0.96 (0.77, 1.20)              | 1.23 (0.92, 1.63)               | 1.18 (0.79, 1.76)               | 1.50 (0.86, 2.62)               | 0.48 (0.06, 3.50) <sup>b</sup>  |
| Bronchitis                 | 1294                   | 0.76 (0.67, 0.86) <sup>a</sup> | 0.72 (0.62, 0.82) <sup>a</sup> | 0.74 (0.63, 0.86) <sup>a</sup> | 0.65 (0.54, 0.79) <sup>a</sup> | 0.69 (0.55, 0.87) <sup>a</sup> | 0.75 (0.56, 1.02)               | 0.67 (0.42, 1.07)               | 0.55 (0.22, 1.35)               | 0.47 (0.06, 3.46) <sup>b</sup>  |
| Arrhythmia                 | 879                    | 1.02 (0.88, 1.18)              | 0.95 (0.81, 1.12)              | 0.97 (0.81, 1.16)              | 1.02 (0.83, 1.24)              | 0.96 (0.75, 1.23)              | 1.01 (0.74, 1.39)               | 0.99 (0.64, 1.56)               | 1.09 (0.56, 2.13)               | 0.50 (0.07, 3.73) <sup>b</sup>  |
| Cerebrovascular            | 211                    | 0.93 (0.68, 1.27)              | 1.03 (0.75, 1.43)              | 1.01 (0.71, 1.45)              | 1.29 (0.88, 1.90)              | 1.23 (0.77, 1.96)              | 1.26 (0.70, 2.28)               | 0.82 (0.31, 2.14)               |                                 |                                 |
| Ischemic                   | 100                    | 1.35 (0.87, 2.08)              | 1.34 (0.85, 2.12)              | 1.37 (0.84, 2.25)              | 1.84 (1.08, 3.15) <sup>a</sup> | 1.57 (0.81, 3.03)              | 2.80 (1.31, 5.97) <sup>a</sup>  | 2.70 (0.93, 7.86)               | 3.01 (0.80, 11.42)              |                                 |
| Myocardial infarction      | 53                     | 1.45 (0.78, 2.69)              | 1.60 (0.85, 3.02)              | 2.19 (1.12, 4.28) <sup>a</sup> | 2.32 (1.11, 4.87) <sup>a</sup> | 1.78 (0.68, 4.63)              | 4.06 (1.42, 11.64) <sup>a</sup> | 6.08 (1.41, 26.28) <sup>a</sup> | 4.84 (0.99, 23.77)              |                                 |
| Heart failure              | 241                    | 0.90 (0.68, 1.20)              | 0.85 (0.62, 1.16)              | 1.03 (0.74, 1.44)              | 1.11 (0.76, 1.63)              | 1.01 (0.63, 1.61)              | 0.81 (0.40, 1.63)               | 1.47 (0.68, 3.18)               | 1.86 (0.63, 5.44)               | 1.49 (0.18, 12.18) <sup>b</sup> |
| Heat illness               | 27                     | 2.94 (1.20, 7.20) <sup>a</sup> | 3.23 (1.37, 7.61) <sup>a</sup> | 3.06 (1.32, 7.11) <sup>a</sup> | 2.55 (1.06, 6.15) <sup>a</sup> | 3.05 (1.10, 8.50) <sup>a</sup> | 1.66 (0.43, 6.43)               | 1.64 (0.33, 8.20)               | 5.99 (0.54, 66.32) <sup>b</sup> |                                 |

<sup>a</sup>95% CI does not include the null.

<sup>b</sup>This footnote is to designate that only one ED visit related to the indicated health outcome occurred three days after an exposure (i.e., a day during which the HI exceeded the indicated threshold) during the study period.

Note: Conditional logistic regression models adjusted for daily PM<sub>2.5</sub> concentration were used to estimate odds ratios. Abbreviations: COPD, chronic obstructive pulmonary disease.

Table S3k. Odds ratios and 95% confidence intervals for emergency department (ED) visits among 15-65 year-olds for heat index (HI) on lag day 4 above versus below the threshold from single-day lag models in Anchorage, Fairbanks, and the Matanuska-Susitna Valley, Alaska, 2015-2019

| <i>Reason for ED visit</i> | <i>Number of cases</i> | <b>70-degree HI threshold</b>  | <b>72-degree HI threshold</b>  | <b>74-degree HI threshold</b>  | <b>76-degree HI threshold</b>  | <b>78-degree HI threshold</b>  | <b>80-degree HI threshold</b>   | <b>82-degree HI threshold</b>   | <b>84-degree HI threshold</b> | <b>86-degree HI threshold</b>   |
|----------------------------|------------------------|--------------------------------|--------------------------------|--------------------------------|--------------------------------|--------------------------------|---------------------------------|---------------------------------|-------------------------------|---------------------------------|
| Asthma                     | 2217                   | 0.93 (0.84, 1.02)              | 0.93 (0.84, 1.03)              | 0.96 (0.86, 1.08)              | 0.95 (0.84, 1.08)              | 1.01 (0.87, 1.18)              | 1.05 (0.86, 1.28)               | 1.08 (0.82, 1.43)               | 0.78 (0.45, 1.34)             | 0.33 (0.05, 2.44) <sup>b</sup>  |
| COPD                       | 1293                   | 0.85 (0.75, 0.96) <sup>a</sup> | 0.85 (0.74, 0.97) <sup>a</sup> | 0.89 (0.77, 1.03)              | 0.90 (0.76, 1.06)              | 0.74 (0.59, 0.92) <sup>a</sup> | 0.72 (0.53, 0.99) <sup>a</sup>  | 0.63 (0.39, 1.01)               | 0.46 (0.18, 1.13)             |                                 |
| Pneumonia                  | 1231                   | 0.92 (0.81, 1.05)              | 0.96 (0.84, 1.10)              | 0.86 (0.74, 1.01)              | 0.85 (0.71, 1.02)              | 0.89 (0.71, 1.11)              | 0.98 (0.73, 1.32)               | 1.02 (0.68, 1.53)               | 0.95 (0.46, 1.98)             | 0.98 (0.23, 4.14)               |
| Bronchitis                 | 1294                   | 0.74 (0.65, 0.85) <sup>a</sup> | 0.74 (0.64, 0.85) <sup>a</sup> | 0.73 (0.62, 0.86) <sup>a</sup> | 0.78 (0.65, 0.93) <sup>a</sup> | 0.74 (0.60, 0.93) <sup>a</sup> | 0.72 (0.53, 0.99) <sup>a</sup>  | 0.59 (0.35, 0.98) <sup>a</sup>  | 0.36 (0.11, 1.15)             |                                 |
| Arrhythmia                 | 879                    | 0.93 (0.80, 1.08)              | 0.95 (0.81, 1.12)              | 0.92 (0.77, 1.10)              | 0.95 (0.78, 1.17)              | 0.85 (0.66, 1.10)              | 1.08 (0.78, 1.49)               | 1.19 (0.78, 1.82)               | 1.65 (0.86, 3.16)             | 1.12 (0.26, 4.78)               |
| Cerebrovascular            | 211                    | 1.01 (0.75, 1.37)              | 0.99 (0.71, 1.36)              | 1.04 (0.73, 1.48)              | 0.92 (0.61, 1.40)              | 0.99 (0.61, 1.62)              | 0.96 (0.51, 1.80)               | 0.87 (0.34, 2.24)               | 0.95 (0.22, 4.07)             |                                 |
| Ischemic                   | 100                    | 1.03 (0.65, 1.63)              | 1.28 (0.80, 2.06)              | 1.59 (0.96, 2.62)              | 1.94 (1.13, 3.34) <sup>a</sup> | 2.38 (1.29, 4.39) <sup>a</sup> | 2.80 (1.37, 5.72) <sup>a</sup>  | 2.73 (0.95, 7.83)               |                               |                                 |
| Myocardial infarction      | 53                     | 1.52 (0.80, 2.89)              | 1.86 (0.96, 3.59)              | 2.64 (1.33, 5.21) <sup>a</sup> | 4.20 (2.00, 8.79) <sup>a</sup> | 4.14 (1.87, 9.16) <sup>a</sup> | 4.18 (1.56, 11.16) <sup>a</sup> | 9.11 (1.88, 44.14) <sup>a</sup> |                               |                                 |
| Heart failure              | 241                    | 0.93 (0.70, 1.23)              | 0.89 (0.65, 1.21)              | 1.01 (0.72, 1.41)              | 0.66 (0.43, 1.02)              | 0.89 (0.55, 1.45)              | 1.20 (0.66, 2.18)               | 0.78 (0.33, 1.89)               | 1.03 (0.24, 4.44)             | 2.77 (0.31, 24.88) <sup>b</sup> |
| Heat illness               | 27                     | 1.93 (0.85, 4.36)              | 1.61 (0.72, 3.61)              | 1.99 (0.86, 4.60)              | 1.00 (0.38, 2.62)              | 0.84 (0.23, 3.00)              | 1.40 (0.37, 5.23)               | 0.75 (0.09, 6.42) <sup>b</sup>  |                               |                                 |

<sup>a</sup> 95% CI does not include the null.

<sup>b</sup> This footnote is to designate that only one ED visit related to the indicated health outcome occurred four days after an exposure (i.e., a day during which the HI exceeded the indicated threshold) during the study period.

Note: Conditional logistic regression models adjusted for daily PM<sub>2.5</sub> concentration were used to estimate odds ratios. Abbreviations: COPD, chronic obstructive pulmonary disease.

Table S31. Odds ratios and 95% confidence intervals for emergency department (ED) visits among 15-65 year-olds for heat index (HI) on lag day 5 above versus below the threshold from single-day lag models in Anchorage, Fairbanks, and the Matanuska-Susitna Valley, Alaska, 2015-2019

| <i>Reason for ED visit</i> | <i>Number of cases</i> | <b>70-degree HI threshold</b>  | <b>72-degree HI threshold</b>  | <b>74-degree HI threshold</b>  | <b>76-degree HI threshold</b>  | <b>78-degree HI threshold</b>  | <b>80-degree HI threshold</b>   | <b>82-degree HI threshold</b>  | <b>84-degree HI threshold</b>   | <b>86-degree HI threshold</b>  |
|----------------------------|------------------------|--------------------------------|--------------------------------|--------------------------------|--------------------------------|--------------------------------|---------------------------------|--------------------------------|---------------------------------|--------------------------------|
| Asthma                     | 2217                   | 0.96 (0.87, 1.05)              | 0.92 (0.83, 1.02)              | 0.97 (0.87, 1.08)              | 0.94 (0.83, 1.07)              | 1.02 (0.88, 1.19)              | 1.03 (0.84, 1.26)               | 1.12 (0.85, 1.48)              | 0.68 (0.37, 1.23)               |                                |
| COPD                       | 1293                   | 0.90 (0.79, 1.02)              | 0.85 (0.75, 0.98) <sup>a</sup> | 0.85 (0.73, 0.98) <sup>a</sup> | 0.83 (0.69, 0.98) <sup>a</sup> | 0.82 (0.66, 1.01)              | 0.83 (0.62, 1.10)               | 0.63 (0.40, 1.00) <sup>a</sup> | 0.68 (0.31, 1.47)               | 2.24 (0.64, 7.76)              |
| Pneumonia                  | 1231                   | 0.91 (0.80, 1.04)              | 0.89 (0.77, 1.02)              | 0.87 (0.74, 1.02)              | 0.85 (0.70, 1.02)              | 0.89 (0.71, 1.11)              | 0.66 (0.47, 0.93) <sup>a</sup>  | 0.63 (0.38, 1.03)              | 0.46 (0.17, 1.28)               | 0.67 (0.09, 5.00) <sup>b</sup> |
| Bronchitis                 | 1294                   | 0.79 (0.70, 0.90) <sup>a</sup> | 0.81 (0.71, 0.93) <sup>a</sup> | 0.77 (0.66, 0.90) <sup>a</sup> | 0.76 (0.63, 0.91) <sup>a</sup> | 0.71 (0.57, 0.89) <sup>a</sup> | 0.72 (0.53, 0.99) <sup>a</sup>  | 0.92 (0.61, 1.41)              | 1.01 (0.49, 2.10)               | 1.44 (0.44, 4.77)              |
| Arrhythmia                 | 879                    | 0.89 (0.77, 1.04)              | 0.92 (0.78, 1.08)              | 0.97 (0.82, 1.16)              | 0.97 (0.79, 1.18)              | 1.04 (0.83, 1.32)              | 1.33 (0.99, 1.80)               | 1.17 (0.76, 1.80)              | 1.18 (0.61, 2.30)               |                                |
| Cerebrovascular            | 211                    | 1.10 (0.82, 1.49)              | 1.13 (0.83, 1.55)              | 0.97 (0.68, 1.38)              | 1.12 (0.76, 1.64)              | 0.92 (0.56, 1.50)              | 0.83 (0.43, 1.60)               | 1.24 (0.54, 2.82)              | 1.01 (0.23, 4.35)               |                                |
| Ischemic                   | 100                    | 1.56 (0.99, 2.44)              | 1.54 (0.97, 2.45)              | 1.62 (0.98, 2.69)              | 1.73 (1.00, 3.00)              | 1.45 (0.75, 2.82)              | 1.97 (0.92, 4.19)               | 0.94 (0.21, 4.13)              | 0.93 (0.12, 7.50) <sup>b</sup>  |                                |
| Myocardial infarction      | 53                     | 2.08 (1.11, 3.90) <sup>a</sup> | 2.28 (1.20, 4.34) <sup>a</sup> | 3.71 (1.89, 7.30) <sup>a</sup> | 3.22 (1.54, 6.74) <sup>a</sup> | 2.83 (1.14, 7.01) <sup>a</sup> | 3.98 (1.36, 11.66) <sup>a</sup> | 0.93 (0.12, 7.44) <sup>a</sup> | 1.65 (0.19, 14.12) <sup>b</sup> |                                |
| Heart failure              | 241                    | 0.99 (0.74, 1.31)              | 0.99 (0.73, 1.35)              | 0.96 (0.68, 1.35)              | 0.77 (0.50, 1.17)              | 0.93 (0.57, 1.50)              | 1.04 (0.56, 1.96)               | 0.83 (0.30, 2.25)              | 1.20 (0.26, 5.66)               |                                |
| Heat illness               | 27                     | 2.16 (0.93, 4.99)              | 1.83 (0.82, 4.08)              | 2.31 (1.02, 5.24) <sup>a</sup> | 2.32 (1.00, 5.41)              | 2.10 (0.79, 5.60)              | 3.28 (1.03, 10.48) <sup>a</sup> | 2.74 (0.72, 10.46)             | 3.58 (0.63, 20.31)              |                                |

<sup>a</sup>95% CI does not include the null.

<sup>b</sup>This footnote is to designate that only one ED visit related to the indicated health outcome occurred five days after an exposure (i.e., a day during which the HI exceeded the indicated threshold) during the study period.

Note: Conditional logistic regression models adjusted for daily PM<sub>2.5</sub> concentration were used to estimate odds ratios. Abbreviations: COPD, chronic obstructive pulmonary disease.

Table S3m. Odds ratios and 95% confidence intervals for emergency department (ED) visits among >65-year-olds for same-day heat index (HI) above versus below the threshold from single-day lag models in Anchorage, Fairbanks, and the Matanuska-Susitna Valley, Alaska, 2015-2019

| <i>Reason for ED visit</i> | <i>Number of cases</i> | <b>70-degree HI threshold</b>  | <b>72-degree HI threshold</b> | <b>74-degree HI threshold</b> | <b>76-degree HI threshold</b> | <b>78-degree HI threshold</b> | <b>80-degree HI threshold</b> | <b>82-degree HI threshold</b>  | <b>84-degree HI threshold</b>   | <b>86-degree HI threshold</b>     |
|----------------------------|------------------------|--------------------------------|-------------------------------|-------------------------------|-------------------------------|-------------------------------|-------------------------------|--------------------------------|---------------------------------|-----------------------------------|
| Asthma                     | 171                    | 1.20 (0.86, 1.67)              | 1.14 (0.80, 1.61)             | 1.07 (0.73, 1.57)             | 0.95 (0.61, 1.49)             | 0.82 (0.46, 1.43)             | 1.33 (0.69, 2.56)             | 2.03 (0.89, 4.65)              | 1.97 (0.51, 7.65)               | 2.91 (0.33, 26.08) <sup>b</sup>   |
| COPD                       | 853                    | 1.03 (0.89, 1.20)              | 1.08 (0.92, 1.26)             | 1.03 (0.86, 1.23)             | 1.06 (0.87, 1.29)             | 1.19 (0.94, 1.50)             | 1.09 (0.79, 1.51)             | 1.00 (0.63, 1.60)              | 1.02 (0.47, 2.24)               | 2.41 (0.70, 8.33)                 |
| Pneumonia                  | 520                    | 0.97 (0.79, 1.18)              | 0.99 (0.80, 1.22)             | 0.90 (0.71, 1.13)             | 0.93 (0.72, 1.22)             | 0.95 (0.68, 1.31)             | 0.95 (0.61, 1.47)             | 1.05 (0.59, 1.87)              | 1.98 (0.92, 4.24)               | 0.89 (0.12, 6.74) <sup>b</sup>    |
| Bronchitis                 | 275                    | 0.87 (0.66, 1.13)              | 0.92 (0.69, 1.22)             | 0.92 (0.68, 1.26)             | 0.81 (0.56, 1.17)             | 0.86 (0.55, 1.34)             | 1.11 (0.65, 1.89)             | 1.22 (0.60, 2.51)              | 1.68 (0.58, 4.84)               |                                   |
| Arrhythmia                 | 724                    | 0.93 (0.79, 1.10)              | 0.84 (0.71, 1.01)             | 0.88 (0.73, 1.08)             | 0.89 (0.71, 1.11)             | 0.89 (0.68, 1.16)             | 0.73 (0.50, 1.08)             | 0.64 (0.37, 1.11)              | 0.71 (0.31, 1.65)               | 1.33 (0.31, 5.73)                 |
| Cerebrovascular            | 223                    | 1.04 (0.77, 1.41)              | 0.90 (0.64, 1.25)             | 1.10 (0.77, 1.57)             | 1.03 (0.68, 1.56)             | 1.20 (0.74, 1.94)             | 1.61 (0.89, 2.90)             | 2.75 (1.38, 5.47) <sup>a</sup> | 2.66 (0.99, 7.14)               | 1.74 (0.21, 14.07) <sup>b</sup>   |
| Ischemic                   | 99                     | 1.09 (0.69, 1.72)              | 1.38 (0.86, 2.19)             | 1.24 (0.75, 2.06)             | 1.00 (0.55, 1.81)             | 1.14 (0.58, 2.27)             | 1.17 (0.43, 3.21)             | 1.76 (0.49, 6.40)              | 1.27 (0.16, 10.21) <sup>b</sup> | 13.27 (0.82, 213.90) <sup>b</sup> |
| Myocardial infarction      | 28                     | 2.74 (1.13, 6.69) <sup>a</sup> | 2.44 (0.99, 5.99)             | 2.04 (0.78, 5.32)             | 1.82 (0.60, 5.56)             | 0.98 (0.21, 4.47)             |                               |                                |                                 |                                   |
| Heart failure              | 199                    | 0.88 (0.64, 1.21)              | 0.92 (0.66, 1.29)             | 0.88 (0.60, 1.28)             | 0.82 (0.52, 1.28)             | 0.85 (0.50, 1.45)             | 1.12 (0.59, 2.13)             | 1.34 (0.56, 3.21)              | 1.86 (0.42, 8.36)               |                                   |

<sup>a</sup>95% CI does not include the null.

<sup>b</sup>This footnote is to designate that only one ED visit related to the indicated health outcome occurred on an exposed day (i.e., a day during which the HI exceeded the indicated threshold) during the study period.

Note: Conditional logistic regression models adjusted for daily PM<sub>2.5</sub> concentration were used to estimate odds ratios. Abbreviations: COPD, chronic obstructive pulmonary disease.

Table S3n. Odds ratios and 95% confidence intervals for ED emergency department (ED) visits among >65-year-olds for heat index (HI) on lag day 1 above versus below the threshold from single-day lag models in Anchorage, Fairbanks, and the Matanuska-Susitna Valley, Alaska, 2015-2019

| <i>Reason for ED visit</i> | <i>Number of cases</i> | <b>70-degree HI threshold</b>  | <b>72-degree HI threshold</b>  | <b>74-degree HI threshold</b>  | <b>76-degree HI threshold</b>  | <b>78-degree HI threshold</b>        | <b>80-degree HI threshold</b>        | <b>82-degree HI threshold</b> | <b>84-degree HI threshold</b>   | <b>86-degree HI threshold</b>   |
|----------------------------|------------------------|--------------------------------|--------------------------------|--------------------------------|--------------------------------|--------------------------------------|--------------------------------------|-------------------------------|---------------------------------|---------------------------------|
| Asthma                     | 171                    | 1.11 (0.79, 1.55)              | 1.10 (0.77, 1.56)              | 1.15 (0.78, 1.68)              | 1.17 (0.76, 1.80)              | <b>1.63 (1.03, 2.58)<sup>a</sup></b> | <b>2.61 (1.51, 4.52)<sup>a</sup></b> | 2.03 (0.97, 4.25)             | 1.62 (0.47, 5.52)               |                                 |
| COPD                       | 853                    | 0.96 (0.82, 1.11)              | 0.95 (0.80, 1.11)              | 0.99 (0.83, 1.18)              | 1.06 (0.86, 1.29)              | 0.96 (0.74, 1.23)                    | 0.78 (0.55, 1.13)                    | 0.91 (0.57, 1.47)             | 1.24 (0.61, 2.49)               | 1.68 (0.50, 5.62)               |
| Pneumonia                  | 520                    | 1.00 (0.82, 1.22)              | 0.91 (0.74, 1.12)              | 0.87 (0.69, 1.10)              | 1.06 (0.82, 1.37)              | 1.13 (0.83, 1.54)                    | 1.38 (0.93, 2.05)                    | 1.42 (0.85, 2.39)             | 1.19 (0.47, 3.02)               |                                 |
| Bronchitis                 | 275                    | 0.86 (0.66, 1.13)              | 0.88 (0.66, 1.17)              | 0.77 (0.56, 1.07)              | 0.66 (0.44, 0.97) <sup>a</sup> | 0.72 (0.45, 1.14)                    | 0.93 (0.53, 1.62)                    | 0.68 (0.28, 1.60)             | 1.02 (0.31, 3.39)               |                                 |
| Arrhythmia                 | 724                    | 0.93 (0.79, 1.10)              | 0.98 (0.83, 1.17)              | 0.95 (0.78, 1.15)              | 0.88 (0.70, 1.11)              | 1.05 (0.80, 1.36)                    | 0.91 (0.63, 1.32)                    | 0.75 (0.43, 1.31)             | 0.60 (0.22, 1.66)               | 1.24 (0.16, 9.68) <sup>b</sup>  |
| Cerebrovascular            | 223                    | 1.17 (0.87, 1.59)              | 1.17 (0.85, 1.61)              | 1.14 (0.79, 1.63)              | 1.24 (0.84, 1.85)              | 1.65 (1.05, 2.62) <sup>a</sup>       | 1.27 (0.63, 2.54)                    | 0.93 (0.32, 2.72)             |                                 |                                 |
| Ischemic                   | 99                     | 1.18 (0.75, 1.84)              | 1.21 (0.76, 1.93)              | 1.58 (0.98, 2.57)              | 1.38 (0.78, 2.44)              | 1.09 (0.54, 2.19)                    | 1.15 (0.47, 2.83)                    | 1.63 (0.54, 4.90)             | 4.68 (1.17, 18.72) <sup>a</sup> | 7.99 (1.33, 47.90) <sup>a</sup> |
| Myocardial infarction      | 28                     | 3.42 (1.44, 8.15) <sup>a</sup> | 3.52 (1.46, 8.53) <sup>a</sup> | 3.75 (1.52, 9.23) <sup>a</sup> | 2.32 (0.80, 6.71)              | 0.40 (0.05, 3.21) <sup>b</sup>       |                                      |                               |                                 |                                 |
| Heart failure              | 199                    | 0.92 (0.67, 1.25)              | 0.86 (0.62, 1.20)              | 0.98 (0.69, 1.41)              | 0.80 (0.52, 1.25)              | 1.07 (0.64, 1.79)                    | 0.89 (0.43, 1.86)                    | 1.05 (0.37, 3.01)             |                                 |                                 |

<sup>a</sup>95% CI does not include the null.

<sup>b</sup>This footnote is to designate that only one ED visit related to the indicated health outcome occurred one day after an exposure (i.e., a day during which the HI exceeded the indicated threshold) during the study period.

Note: Conditional logistic regression models adjusted for daily PM<sub>2.5</sub> concentration were used to estimate odds ratios. Abbreviations: COPD, chronic obstructive pulmonary disease.

Table S3o. Odds ratios and 95% confidence intervals for emergency department (ED) visits among >65-year-olds for heat index (HI) on lag day 2 above versus below the threshold from single-day lag models in Anchorage, Fairbanks, and the Matanuska-Susitna Valley, Alaska, 2015-2019

| <i>Reason for ED visit</i> | <i>Number of cases</i> | <b>70-degree HI threshold</b>  | <b>72-degree HI threshold</b> | <b>74-degree HI threshold</b>  | <b>76-degree HI threshold</b>  | <b>78-degree HI threshold</b>  | <b>80-degree HI threshold</b>  | <b>82-degree HI threshold</b>  | <b>84-degree HI threshold</b>  | <b>86-degree HI threshold</b>   |
|----------------------------|------------------------|--------------------------------|-------------------------------|--------------------------------|--------------------------------|--------------------------------|--------------------------------|--------------------------------|--------------------------------|---------------------------------|
| Asthma                     | 171                    | 1.05 (0.75, 1.47)              | 1.22 (0.86, 1.73)             | 1.48 (1.03, 2.14) <sup>a</sup> | 1.54 (1.02, 2.32) <sup>a</sup> | 1.80 (1.13, 2.86) <sup>a</sup> | 2.35 (1.35, 4.09) <sup>a</sup> | 3.18 (1.58, 6.41) <sup>a</sup> | 2.45 (0.61, 9.81)              |                                 |
| COPD                       | 853                    | 0.90 (0.77, 1.05)              | 0.92 (0.78, 1.09)             | 0.89 (0.73, 1.07)              | 0.96 (0.78, 1.19)              | 0.88 (0.67, 1.14)              | 0.80 (0.55, 1.15)              | 1.04 (0.64, 1.69)              | 0.76 (0.31, 1.91)              | 0.64 (0.09, 4.75) <sup>b</sup>  |
| Pneumonia                  | 520                    | 1.05 (0.86, 1.27)              | 0.92 (0.75, 1.14)             | 0.95 (0.76, 1.20)              | 1.02 (0.79, 1.32)              | 1.18 (0.87, 1.60)              | 1.11 (0.74, 1.68)              | 0.91 (0.50, 1.64)              | 0.92 (0.36, 2.32)              | 1.60 (0.36, 7.01)               |
| Bronchitis                 | 275                    | 0.89 (0.68, 1.17)              | 0.93 (0.69, 1.23)             | 0.78 (0.56, 1.08)              | 0.74 (0.50, 1.09)              | 0.86 (0.55, 1.35)              | 0.80 (0.44, 1.47)              | 0.82 (0.34, 1.93)              | 1.16 (0.35, 3.85)              | 2.01 (0.24, 16.52) <sup>b</sup> |
| Arrhythmia                 | 724                    | 0.94 (0.79, 1.11)              | 0.97 (0.82, 1.16)             | 0.93 (0.77, 1.13)              | 0.92 (0.73, 1.15)              | 0.87 (0.66, 1.15)              | 0.88 (0.60, 1.29)              | 0.78 (0.45, 1.36)              | 0.59 (0.21, 1.62)              | 0.76 (0.10, 5.78) <sup>b</sup>  |
| Cerebrovascular            | 223                    | 1.12 (0.83, 1.51)              | 1.08 (0.79, 1.49)             | 1.09 (0.77, 1.54)              | 1.20 (0.81, 1.77)              | 0.98 (0.59, 1.62)              | 0.41 (0.16, 1.05)              | 0.37 (0.09, 1.56)              | 1.30 (0.29, 5.72)              |                                 |
| Ischemic                   | 99                     | 1.19 (0.76, 1.86)              | 1.03 (0.64, 1.67)             | 1.04 (0.63, 1.74)              | 0.89 (0.49, 1.62)              | 0.70 (0.32, 1.52)              | 0.81 (0.31, 2.12)              | 0.68 (0.16, 2.98)              | 1.12 (0.14, 9.00) <sup>b</sup> |                                 |
| Myocardial infarction      | 28                     | 2.92 (1.27, 6.69) <sup>a</sup> | 1.96 (0.81, 4.73)             | 2.12 (0.85, 5.31)              | 1.03 (0.32, 3.31)              |                                |                                |                                |                                |                                 |
| Heart failure              | 199                    | 0.92 (0.68, 1.26)              | 0.82 (0.58, 1.15)             | 0.85 (0.59, 1.24)              | 0.94 (0.61, 1.43)              | 1.13 (0.69, 1.84)              | 0.78 (0.37, 1.65)              | 1.03 (0.40, 2.66)              | 0.58 (0.08, 4.35) <sup>b</sup> | 2.38 (0.28, 20.38) <sup>b</sup> |

<sup>a</sup> 95% CI does not include the null.

<sup>b</sup> This footnote is to designate that only one ED visit related to the indicated health outcome occurred two days after an exposure (i.e., a day during which the HI exceeded the indicated threshold) during the study period.

Note: Conditional logistic regression models adjusted for daily PM<sub>2.5</sub> concentration were used to estimate odds ratios. Abbreviations: COPD, chronic obstructive pulmonary disease.

Table S3p. Odds ratios and 95% confidence intervals for emergency department (ED) visits among >65-year-olds for heat index (HI) on lag day 3 above versus below the threshold from single-day lag models in Anchorage, Fairbanks, and the Matanuska-Susitna Valley, Alaska, 2015-2019

| <i>Reason for ED visit</i> | <i>Number of cases</i> | <b>70-degree HI threshold</b>  | <b>72-degree HI threshold</b>  | <b>74-degree HI threshold</b>  | <b>76-degree HI threshold</b>  | <b>78-degree HI threshold</b>  | <b>80-degree HI threshold</b>  | <b>82-degree HI threshold</b>  | <b>84-degree HI threshold</b>  | <b>86-degree HI threshold</b>   |
|----------------------------|------------------------|--------------------------------|--------------------------------|--------------------------------|--------------------------------|--------------------------------|--------------------------------|--------------------------------|--------------------------------|---------------------------------|
| Asthma                     | 171                    | 1.32 (0.95, 1.83)              | 1.45 (1.03, 2.03) <sup>a</sup> | 1.29 (0.90, 1.87)              | 1.11 (0.72, 1.70)              | 1.27 (0.77, 2.09)              | 1.93 (1.05, 3.53) <sup>a</sup> | 2.03 (0.87, 4.74)              | 0.82 (0.10, 6.47) <sup>b</sup> | 5.96 (0.54, 65.69) <sup>b</sup> |
| COPD                       | 853                    | 0.91 (0.78, 1.06)              | 0.92 (0.78, 1.09)              | 0.80 (0.67, 0.97) <sup>a</sup> | 0.82 (0.66, 1.02)              | 0.90 (0.69, 1.16)              | 0.92 (0.65, 1.32)              | 0.87 (0.53, 1.44)              | 0.74 (0.30, 1.85)              |                                 |
| Pneumonia                  | 520                    | 0.92 (0.76, 1.12)              | 0.91 (0.73, 1.12)              | 1.00 (0.79, 1.26)              | 1.06 (0.82, 1.37)              | 0.91 (0.66, 1.26)              | 0.87 (0.57, 1.34)              | 1.43 (0.87, 2.36)              | 1.01 (0.40, 2.56)              |                                 |
| Bronchitis                 | 275                    | 0.90 (0.68, 1.18)              | 0.87 (0.65, 1.17)              | 0.86 (0.62, 1.18)              | 0.77 (0.52, 1.13)              | 0.76 (0.48, 1.21)              | 0.77 (0.41, 1.45)              | 1.19 (0.52, 2.73)              | 0.76 (0.18, 3.21)              |                                 |
| Arrhythmia                 | 724                    | 0.84 (0.71, 0.99) <sup>a</sup> | 0.83 (0.69, 1.00) <sup>a</sup> | 0.80 (0.65, 0.98) <sup>a</sup> | 0.75 (0.59, 0.95) <sup>a</sup> | 0.81 (0.61, 1.08)              | 1.09 (0.77, 1.54)              | 1.26 (0.79, 2.00)              | 0.72 (0.29, 1.83)              | 0.60 (0.08, 4.51) <sup>b</sup>  |
| Cerebrovascular            | 223                    | 0.93 (0.69, 1.26)              | 0.91 (0.65, 1.26)              | 0.79 (0.54, 1.15)              | 0.64 (0.40, 1.01)              | 0.40 (0.21, 0.79) <sup>a</sup> | 0.38 (0.15, 0.96) <sup>a</sup> | 0.18 (0.02, 1.36) <sup>b</sup> |                                |                                 |
| Ischemic                   | 99                     | 1.04 (0.66, 1.63)              | 0.87 (0.53, 1.42)              | 0.76 (0.44, 1.32)              | 0.78 (0.42, 1.43)              | 0.97 (0.49, 1.94)              | 0.41 (0.13, 1.35)              | 0.68 (0.16, 2.94)              | 1.70 (0.38, 7.69)              |                                 |
| Myocardial infarction      | 28                     | 1.27 (0.51, 3.19)              | 1.33 (0.49, 3.61)              | 1.09 (0.36, 3.30)              | 1.22 (0.35, 4.16)              | 1.12 (0.22, 5.82)              |                                |                                |                                |                                 |
| Heart failure              | 199                    | 0.82 (0.60, 1.13)              | 0.89 (0.64, 1.25)              | 0.81 (0.55, 1.19)              | 0.74 (0.47, 1.16)              | 0.69 (0.39, 1.22)              | 0.67 (0.32, 1.40)              | 1.00 (0.37, 2.69)              | 1.22 (0.27, 5.44)              |                                 |

<sup>a</sup>95% CI does not include the null.

<sup>b</sup>This footnote is to designate that only one ED visit related to the indicated health outcome occurred three days after an exposure (i.e., a day during which the HI exceeded the indicated threshold) during the study period.

Note: Conditional logistic regression models adjusted for daily PM<sub>2.5</sub> concentration were used to estimate odds ratios. Abbreviations: COPD, chronic obstructive pulmonary disease.



Table S3q. Odds ratios and 95% confidence intervals for emergency department (ED) visits among >65-year-olds for heat index (HI) on lag day 4 above versus below the threshold from single-day lag models in Anchorage, Fairbanks, and the Matanuska-Susitna Valley, Alaska, 2015-2019

| <i>Reason for ED visit</i> | <i>Number of cases</i> | <b>70-degree HI threshold</b>  | <b>72-degree HI threshold</b>  | <b>74-degree HI threshold</b> | <b>76-degree HI threshold</b> | <b>78-degree HI threshold</b>  | <b>80-degree HI threshold</b> | <b>82-degree HI threshold</b> | <b>84-degree HI threshold</b>  | <b>86-degree HI threshold</b>  |
|----------------------------|------------------------|--------------------------------|--------------------------------|-------------------------------|-------------------------------|--------------------------------|-------------------------------|-------------------------------|--------------------------------|--------------------------------|
| Asthma                     | 171                    | 1.16 (0.84, 1.62)              | 1.13 (0.80, 1.59)              | 1.21 (0.83, 1.76)             | 1.24 (0.81, 1.89)             | 1.66 (1.04, 2.64) <sup>a</sup> | 1.46 (0.77, 2.79)             | 0.94 (0.35, 2.50)             | 1.86 (0.49, 7.07)              |                                |
| COPD                       | 853                    | 0.96 (0.82, 1.12)              | 0.96 (0.81, 1.13)              | 0.92 (0.77, 1.11)             | 0.95 (0.77, 1.17)             | 0.96 (0.75, 1.24)              | 1.07 (0.76, 1.52)             | 1.08 (0.67, 1.75)             | 1.58 (0.80, 3.11)              | 2.45 (0.54, 11.17)             |
| Pneumonia                  | 520                    | 0.92 (0.75, 1.12)              | 0.94 (0.76, 1.16)              | 0.91 (0.72, 1.15)             | 0.89 (0.68, 1.18)             | 0.83 (0.59, 1.16)              | 0.87 (0.56, 1.35)             | 0.82 (0.44, 1.52)             | 0.75 (0.27, 2.09)              |                                |
| Bronchitis                 | 275                    | 0.72 (0.55, 0.95) <sup>a</sup> | 0.72 (0.53, 0.97) <sup>a</sup> | 0.77 (0.56, 1.07)             | 0.69 (0.46, 1.03)             | 0.70 (0.43, 1.13)              | 0.69 (0.36, 1.33)             | 0.56 (0.20, 1.56)             | 1.48 (0.44, 5.03)              | 4.26 (0.85, 21.26)             |
| Arrhythmia                 | 724                    | 0.91 (0.77, 1.07)              | 0.89 (0.75, 1.07)              | 0.84 (0.69, 1.03)             | 0.94 (0.75, 1.17)             | 1.01 (0.77, 1.32)              | 1.12 (0.79, 1.58)             | 1.32 (0.83, 2.10)             | 0.98 (0.42, 2.31)              | 0.92 (0.12, 7.06) <sup>b</sup> |
| Cerebrovascular            | 223                    | 0.94 (0.70, 1.27)              | 0.85 (0.61, 1.18)              | 0.88 (0.62, 1.26)             | 0.83 (0.54, 1.25)             | 0.68 (0.39, 1.17)              | 0.59 (0.28, 1.25)             | 0.43 (0.13, 1.44)             | 0.90 (0.21, 3.95)              |                                |
| Ischemic                   | 99                     | 0.88 (0.56, 1.37)              | 0.99 (0.62, 1.59)              | 1.03 (0.62, 1.73)             | 0.93 (0.52, 1.68)             | 0.52 (0.22, 1.22)              | 0.28 (0.07, 1.17)             | 0.60 (0.14, 2.52)             | 0.79 (0.10, 6.01) <sup>b</sup> |                                |
| Myocardial infarction      | 28                     | 0.90 (0.38, 2.16)              | 0.98 (0.39, 2.49)              | 1.15 (0.42, 3.18)             | 1.72 (0.60, 4.96)             | 0.32 (0.04, 2.54) <sup>b</sup> |                               |                               |                                |                                |
| Heart failure              | 199                    | 1.14 (0.84, 1.56)              | 0.85 (0.60, 1.20)              | 0.80 (0.54, 1.18)             | 0.78 (0.50, 1.21)             | 0.74 (0.42, 1.29)              | 0.87 (0.44, 1.73)             | 0.34 (0.08, 1.43)             | 0.53 (0.07, 4.00) <sup>b</sup> | 1.09 (0.14, 8.60) <sup>b</sup> |

<sup>a</sup>95% CI does not include the null.

<sup>b</sup>This footnote is to designate that only one ED visit related to the indicated health outcome occurred four days after an exposure (i.e., a day during which the HI exceeded the indicated threshold) during the study period.

Note: Conditional logistic regression models adjusted for daily PM<sub>2.5</sub> concentration were used to estimate odds ratios. Abbreviations: COPD, chronic obstructive pulmonary disease.

Table S3r. Odds ratios and 95% confidence intervals for emergency department (ED) visits among >65-year-olds for heat index (HI) on lag day 5 above versus below the threshold from single-day lag models in Anchorage, Fairbanks, and the Matanuska-Susitna Valley, Alaska, 2015-2019

| <i>Reason for ED visit</i> | <i>Number of cases</i> | <b>70-degree HI threshold</b> | <b>72-degree HI threshold</b> | <b>74-degree HI threshold</b> | <b>76-degree HI threshold</b>  | <b>78-degree HI threshold</b>  | <b>80-degree HI threshold</b> | <b>82-degree HI threshold</b> | <b>84-degree HI threshold</b>  | <b>86-degree HI threshold</b>   |
|----------------------------|------------------------|-------------------------------|-------------------------------|-------------------------------|--------------------------------|--------------------------------|-------------------------------|-------------------------------|--------------------------------|---------------------------------|
| Asthma                     | 171                    | 1.06 (0.76, 1.48)             | 0.95 (0.66, 1.36)             | 1.00 (0.68, 1.49)             | 1.28 (0.83, 1.95)              | 0.86 (0.48, 1.53)              | 0.81 (0.37, 1.76)             | 1.07 (0.39, 2.88)             | 0.62 (0.07, 5.23) <sup>b</sup> |                                 |
| COPD                       | 853                    | 0.93 (0.80, 1.08)             | 0.89 (0.76, 1.05)             | 0.91 (0.76, 1.09)             | 0.81 (0.65, 1.00)              | 0.72 (0.54, 0.94) <sup>a</sup> | 0.78 (0.55, 1.13)             | 0.77 (0.46, 1.30)             | 0.69 (0.28, 1.73)              | 1.83 (0.54, 6.19)               |
| Pneumonia                  | 520                    | 0.95 (0.78, 1.16)             | 0.92 (0.75, 1.14)             | 1.00 (0.79, 1.27)             | 1.03 (0.79, 1.35)              | 0.99 (0.72, 1.37)              | 0.74 (0.47, 1.18)             | 1.26 (0.73, 2.17)             | 1.39 (0.62, 3.12)              | 1.56 (0.19, 12.56) <sup>b</sup> |
| Bronchitis                 | 275                    | 0.93 (0.71, 1.21)             | 0.91 (0.68, 1.21)             | 1.05 (0.77, 1.43)             | 0.90 (0.62, 1.31)              | 0.67 (0.41, 1.09)              | 0.61 (0.31, 1.20)             | 0.91 (0.38, 2.15)             | 0.86 (0.20, 3.69)              | 1.93 (0.23, 15.88) <sup>b</sup> |
| Arrhythmia                 | 724                    | 0.96 (0.82, 1.14)             | 0.88 (0.74, 1.06)             | 0.90 (0.74, 1.09)             | 0.96 (0.77, 1.19)              | 1.05 (0.81, 1.37)              | 1.17 (0.84, 1.63)             | 0.99 (0.60, 1.61)             | 0.67 (0.27, 1.68)              | 1.12 (0.26, 4.74)               |
| Cerebrovascular            | 223                    | 1.11 (0.82, 1.48)             | 1.12 (0.83, 1.53)             | 1.20 (0.86, 1.68)             | 1.22 (0.83, 1.79)              | 1.13 (0.71, 1.80)              | 1.06 (0.57, 1.97)             | 1.60 (0.74, 3.46)             | 1.08 (0.25, 4.63)              | 2.15 (0.26, 17.88) <sup>b</sup> |
| Ischemic                   | 99                     | 0.99 (0.64, 1.55)             | 0.96 (0.60, 1.54)             | 0.83 (0.48, 1.42)             | 0.97 (0.52, 1.78)              | 0.90 (0.43, 1.89)              | 0.90 (0.36, 2.23)             | 0.52 (0.11, 2.36)             | 1.27 (0.25, 6.39)              |                                 |
| Myocardial infarction      | 28                     | 1.46 (0.62, 3.44)             | 1.90 (0.79, 4.55)             | 1.03 (0.35, 2.99)             | 1.53 (0.46, 5.14)              | 1.02 (0.20, 5.25)              |                               |                               |                                |                                 |
| Heart failure              | 199                    | 1.19 (0.87, 1.62)             | 1.05 (0.74, 1.47)             | 0.90 (0.61, 1.32)             | 0.58 (0.35, 0.95) <sup>a</sup> | 0.67 (0.37, 1.22)              | 0.66 (0.27, 1.61)             | 0.65 (0.15, 2.84)             |                                |                                 |

<sup>a</sup>95% CI does not include the null.

<sup>b</sup>This footnote is to designate that only one ED visit related to the indicated health outcome occurred five days after an exposure (i.e., a day during which the HI exceeded the indicated threshold) during the study period.

Note: Conditional logistic regression models adjusted for daily PM<sub>2.5</sub> concentration were used to estimate odds ratios. Abbreviations: COPD, chronic obstructive pulmonary disease.

## Tables S4a-g – Acute heatwave analysis stratified by sex, race, and age

Table S4a. Odds ratios and 95% confidence intervals for emergency department (ED) visits on heatwave days versus non-heatwave days among females in Anchorage, Fairbanks, and the Matanuska-Susitna Valley, Alaska, 2015-2019

| <i>Reason for ED visit</i> | <i>Number of cases</i> | <b>70-degree HI threshold</b>     | <b>72-degree HI threshold</b>   | <b>74-degree HI threshold</b>   | <b>76-degree HI threshold</b>     | <b>78-degree HI threshold</b>     | <b>80-degree HI threshold</b>    | <b>82-degree HI threshold</b>     | <b>84-degree HI threshold</b>   | <b>86-degree HI threshold</b> |
|----------------------------|------------------------|-----------------------------------|---------------------------------|---------------------------------|-----------------------------------|-----------------------------------|----------------------------------|-----------------------------------|---------------------------------|-------------------------------|
| Heat illness               | 14                     | 15.07 (1.88, 120.70) <sup>a</sup> | 8.83 (1.85, 42.07) <sup>a</sup> | 8.86 (2.20, 35.66) <sup>a</sup> | 22.13 (4.45, 110.03) <sup>a</sup> | 50.76 (5.81, 443.82) <sup>a</sup> |                                  | 8.63 (1.19, 62.48) <sup>a</sup>   |                                 |                               |
| Asthma                     | 1651                   | 1.07 (0.96, 1.20)                 | 1.07 (0.95, 1.21)               | 1.03 (0.89, 1.18)               | 0.98 (0.83, 1.16)                 | 1.09 (0.88, 1.35)                 | 1.13 (0.87, 1.46)                | 1.17 (0.78, 1.74)                 | 0.56 (0.20, 1.63)               |                               |
| COPD                       | 1138                   | 1.00 (0.87, 1.14)                 | 0.96 (0.82, 1.12)               | 1.01 (0.85, 1.20)               | 1.01 (0.82, 1.24)                 | 0.85 (0.65, 1.13)                 | 0.78 (0.54, 1.13)                | 0.86 (0.48, 1.54)                 | 2.13 (0.72, 6.25)               |                               |
| Pneumonia                  | 999                    | 0.93 (0.79, 1.08)                 | 0.89 (0.75, 1.06)               | 0.93 (0.77, 1.13)               | 1.05 (0.84, 1.31)                 | 1.37 (1.05, 1.79) <sup>a</sup>    | 1.44 (1.03, 2.02) <sup>a</sup>   | 1.83 (1.12, 3.00) <sup>a</sup>    | 1.05 (0.24, 4.53)               |                               |
| Bronchitis                 | 1130                   | 0.81 (0.70, 0.93) <sup>a</sup>    | 0.82 (0.70, 0.96) <sup>a</sup>  | 0.78 (0.64, 0.94) <sup>a</sup>  | 0.79 (0.63, 0.99) <sup>a</sup>    | 0.76 (0.56, 1.03)                 | 0.67 (0.45, 1.00) <sup>a</sup>   | 0.48 (0.23, 0.98) <sup>a</sup>    | 2.09 (0.79, 5.53)               |                               |
| Arrhythmia                 | 676                    | 1.00 (0.83, 1.20)                 | 0.95 (0.78, 1.16)               | 0.99 (0.79, 1.25)               | 1.07 (0.82, 1.39)                 | 1.25 (0.90, 1.73)                 | 1.03 (0.66, 1.63)                | 0.63 (0.27, 1.47)                 | 1.40 (0.31, 6.28)               |                               |
| Cerebrovascular            | 207                    | 1.21 (0.87, 1.69)                 | 1.29 (0.90, 1.85)               | 1.45 (0.97, 2.16)               | 1.52 (0.95, 2.44)                 | 1.50 (0.84, 2.68)                 | 1.21 (0.53, 2.79)                | 1.24 (0.37, 4.18)                 |                                 |                               |
| Ischemic                   | 62                     | 1.08 (0.59, 1.98)                 | 1.57 (0.85, 2.93)               | 2.07 (1.06, 4.02) <sup>a</sup>  | 2.49 (1.21, 5.12) <sup>a</sup>    | 2.90 (1.22, 6.90) <sup>a</sup>    | 2.80 (0.82, 9.52)                | 7.94 (2.00, 31.49) <sup>a</sup>   |                                 |                               |
| Myocardial infarction      | 21                     | 2.23 (0.84, 5.92)                 | 3.52 (1.27, 9.70) <sup>a</sup>  | 3.67 (1.19, 11.27) <sup>a</sup> | 6.03 (1.97, 18.48) <sup>a</sup>   | 5.52 (1.23, 24.78) <sup>a</sup>   | 8.45 (0.49, 145.31) <sup>b</sup> | 11.23 (0.65, 194.55) <sup>b</sup> |                                 |                               |
| Heart failure              | 162                    | 0.99 (0.70, 1.42)                 | 1.01 (0.68, 1.50)               | 3.67 (1.19, 11.27) <sup>a</sup> | 1.07 (0.64, 1.81)                 | 1.17 (0.62, 2.20)                 | 0.66 (0.25, 1.74)                | 0.88 (0.22, 3.49)                 | 1.69 (0.19, 15.28) <sup>b</sup> |                               |

<sup>a</sup>95% CI does not include the null.

<sup>b</sup>This footnote is to designate that only one ED visit related to the indicated health outcome occurred on an exposed day (i.e., an acute heatwave day as defined above) during the study period.

Note: For the acute heatwave analysis, the results of which are reported in this table, a heatwave day was defined as a day on which the observed heat index (HI) was above the indicated threshold as was the HI on the previous day. Days with a HI below the threshold and/or those that were preceded by a daily HI below the threshold were considered non-heatwave days. Conditional logistic regression models adjusted for daily PM<sub>2.5</sub> concentration were used to estimate odds ratios. Abbreviations: COPD, chronic obstructive pulmonary disease.

Table S4b. Odds ratios and 95% confidence intervals for emergency department (ED) visits on heatwave days versus non-heatwave days among males in Anchorage, Fairbanks, and the Matanuska-Susitna Valley, Alaska, 2015-2019

| <i>Reason for ED visit</i> | <i>Number of cases</i> | <b>70-degree HI threshold</b>    | <b>72-degree HI threshold</b>    | <b>74-degree HI threshold</b>    | <b>76-degree HI threshold</b>    | <b>78-degree HI threshold</b>    | <b>80-degree HI threshold</b>    | <b>82-degree HI threshold</b>    | <b>84-degree HI threshold</b>   | <b>86-degree HI threshold</b> |
|----------------------------|------------------------|----------------------------------|----------------------------------|----------------------------------|----------------------------------|----------------------------------|----------------------------------|----------------------------------|---------------------------------|-------------------------------|
| Heat illness               | 21                     | 15.28 (3.50, 66.76) <sup>a</sup> | 10.68 (3.46, 33.00) <sup>a</sup> | 12.13 (4.16, 35.35) <sup>a</sup> | 20.21 (6.34, 64.43) <sup>a</sup> | 15.76 (5.26, 47.28) <sup>a</sup> | 14.02 (4.31, 45.67) <sup>a</sup> | 15.73 (3.63, 68.14) <sup>a</sup> | 5.99 (0.54, 66.05) <sup>b</sup> |                               |
| Asthma                     | 1260                   | 0.98 (0.86, 1.12)                | 0.98 (0.85, 1.14)                | 1.06 (0.90, 1.24)                | 1.09 (0.90, 1.32)                | 1.01 (0.79, 1.28)                | 0.94 (0.70, 1.27)                | 1.24 (0.79, 1.93)                | 0.94 (0.30, 2.94)               |                               |
| COPD                       | 1020                   | 0.96 (0.83, 1.11)                | 0.98 (0.83, 1.16)                | 0.91 (0.75, 1.10)                | 0.91 (0.72, 1.15)                | 0.78 (0.57, 1.08)                | 0.58 (0.36, 0.92) <sup>a</sup>   | 0.34 (0.14, 0.84) <sup>a</sup>   | 0.53 (0.07, 3.96) <sup>b</sup>  |                               |
| Pneumonia                  | 1082                   | 0.89 (0.77, 1.04)                | 0.89 (0.75, 1.04)                | 0.89 (0.74, 1.07)                | 0.90 (0.72, 1.13)                | 1.04 (0.78, 1.38)                | 0.98 (0.67, 1.42)                | 1.01 (0.57, 1.76)                | 1.15 (0.27, 4.90)               |                               |
| Bronchitis                 | 842                    | 0.81 (0.68, 0.95) <sup>a</sup>   | 0.81 (0.68, 0.98) <sup>a</sup>   | 0.80 (0.64, 0.99) <sup>a</sup>   | 0.68 (0.51, 0.89) <sup>a</sup>   | 0.70 (0.49, 1.00) <sup>a</sup>   | 0.83 (0.55, 1.26)                | 0.79 (0.39, 1.58)                | 0.72 (0.17, 3.04)               |                               |
| Arrhythmia                 | 941                    | 1.01 (0.87, 1.18)                | 1.03 (0.87, 1.22)                | 0.97 (0.80, 1.18)                | 0.81 (0.64, 1.04)                | 0.72 (0.52, 1.00)                | 0.51 (0.31, 0.83) <sup>a</sup>   | 0.85 (0.44, 1.63)                | 0.91 (0.21, 3.89)               |                               |
| Cerebrovascular            | 227                    | 0.85 (0.62, 1.18)                | 0.86 (0.60, 1.22)                | 0.83 (0.55, 1.25)                | 0.94 (0.58, 1.50)                | 1.35 (0.78, 2.34)                | 1.07 (0.52, 2.20)                | 1.23 (0.41, 3.70)                | 1.07 (0.12, 9.68) <sup>b</sup>  |                               |
| Ischemic                   | 138                    | 1.44 (0.97, 2.14)                | 1.45 (0.94, 2.23)                | 1.56 (0.97, 2.49)                | 1.42 (0.80, 2.54)                | 0.93 (0.38, 2.26)                | 1.32 (0.43, 4.05)                |                                  |                                 |                               |
| Myocardial infarction      | 61                     | 2.16 (1.20, 3.87) <sup>a</sup>   | 1.72 (0.89, 3.32)                | 1.83 (0.88, 3.81)                | 1.94 (0.82, 4.59)                | 0.42 (0.04, 4.27) <sup>b</sup>   | 0.67 (0.06, 7.27) <sup>b</sup>   |                                  |                                 |                               |
| Heart failure              | 279                    | 0.68 (0.50, 0.92) <sup>a</sup>   | 0.64 (0.45, 0.91) <sup>a</sup>   | 0.68 (0.45, 1.02)                | 0.74 (0.46, 1.20)                | 0.57 (0.28, 1.16)                | 0.80 (0.38, 1.73)                | 1.07 (0.31, 3.77)                | 2.33 (0.26, 21.20) <sup>b</sup> |                               |

<sup>a</sup>95% CI does not include the null.

<sup>b</sup>This footnote is to designate that only one ED visit related to the indicated health outcome occurred on an exposed day (i.e., an acute heatwave day as defined above) during the study period.

Note: For the acute heatwave analysis, the results of which are reported in this table, a heatwave day was defined as a day on which the observed heat index (HI) was above the indicated threshold as was the HI on the previous day. Days with a HI below the threshold and/or those that were preceded by a daily HI below the threshold were considered non-heatwave days. Conditional logistic regression models adjusted for daily PM<sub>2.5</sub> concentration were used to estimate odds ratios. Abbreviations: COPD, chronic obstructive pulmonary disease.

Table S4c. Odds ratios and 95% confidence intervals for emergency department (ED) visits on heatwave days versus non-heatwave days among Alaska Native people in Anchorage, Fairbanks, and the Matanuska-Susitna Valley, Alaska, 2015-2019

| <i>Reason for ED visit</i> | <i>Number of cases</i> | <b>70-degree HI threshold</b>     | <b>72-degree HI threshold</b>     | <b>74-degree HI threshold</b>   | <b>76-degree HI threshold</b>     | <b>78-degree HI threshold</b>   | <b>80-degree HI threshold</b>   | <b>82-degree HI threshold</b>    | <b>84-degree HI threshold</b>   | <b>86-degree HI threshold</b> |
|----------------------------|------------------------|-----------------------------------|-----------------------------------|---------------------------------|-----------------------------------|---------------------------------|---------------------------------|----------------------------------|---------------------------------|-------------------------------|
| Heat illness               | 10                     | 14.18 (1.68, 119.44) <sup>a</sup> | 21.75 (2.37, 199.73) <sup>a</sup> | 8.01 (1.69, 38.03) <sup>a</sup> | 25.95 (2.52, 266.74) <sup>a</sup> | 8.25 (1.22, 55.85) <sup>a</sup> | 7.44 (1.05, 52.93) <sup>a</sup> | 6.98 (0.43, 113.46) <sup>b</sup> |                                 |                               |
| Asthma                     | 920                    | 1.08 (0.93, 1.26)                 | 1.01 (0.86, 1.20)                 | 1.00 (0.83, 1.22)               | 0.98 (0.77, 1.23)                 | 0.99 (0.74, 1.34)               | 1.11 (0.77, 1.59)               | 1.51 (0.88, 2.58)                | 0.89 (0.17, 4.57)               |                               |
| COPD                       | 477                    | 0.80 (0.64, 0.99) <sup>a</sup>    | 0.79 (0.61, 1.01)                 | 0.73 (0.55, 0.98) <sup>a</sup>  | 0.87 (0.62, 1.22)                 | 0.70 (0.44, 1.12)               | 0.57 (0.30, 1.10)               | 0.65 (0.23, 1.84)                |                                 |                               |
| Pneumonia                  | 625                    | 0.79 (0.65, 0.96) <sup>a</sup>    | 0.77 (0.62, 0.97) <sup>a</sup>    | 0.81 (0.63, 1.04)               | 1.01 (0.75, 1.36)                 | 1.24 (0.87, 1.77)               | 1.51 (0.98, 2.32)               | 1.61 (0.84, 3.09)                | 1.26 (0.16, 9.93) <sup>b</sup>  |                               |
| Bronchitis                 | 597                    | 0.86 (0.71, 1.05)                 | 0.81 (0.65, 1.01)                 | 0.70 (0.54, 0.92) <sup>a</sup>  | 0.73 (0.53, 1.01)                 | 0.66 (0.42, 1.04)               | 0.66 (0.37, 1.18)               | 0.72 (0.28, 1.83)                | 1.85 (0.41, 8.32)               |                               |
| Arrhythmia                 | 222                    | 0.88 (0.63, 1.22)                 | 0.95 (0.67, 1.36)                 | 0.79 (0.52, 1.21)               | 0.83 (0.50, 1.39)                 | 0.96 (0.50, 1.83)               | 0.36 (0.11, 1.18)               | 0.42 (0.06, 3.08) <sup>b</sup>   |                                 |                               |
| Cerebrovascular            | 62                     | 0.91 (0.50, 1.64)                 | 0.81 (0.41, 1.60)                 | 1.05 (0.51, 2.15)               | 1.71 (0.80, 3.68)                 | 1.98 (0.80, 4.93)               | 2.25 (0.64, 7.85)               | 1.86 (0.35, 9.86)                |                                 |                               |
| Ischemic                   | 35                     | 1.68 (0.78, 3.66)                 | 1.89 (0.85, 4.20)                 | 2.22 (0.98, 5.07)               | 4.16 (1.79, 9.69) <sup>a</sup>    | 3.85 (1.34, 11.12) <sup>a</sup> | 4.12 (1.12, 15.24) <sup>a</sup> | 1.81 (0.15, 21.18) <sup>b</sup>  |                                 |                               |
| Myocardial infarction      | 20                     | 2.75 (0.96, 7.87)                 | 2.41 (0.81, 7.16)                 | 2.25 (0.73, 6.89)               | 4.15 (1.28, 13.51) <sup>a</sup>   | 3.16 (0.45, 22.08)              | 5.94 (0.71, 49.42)              | 4.92 (0.24, 98.90) <sup>b</sup>  |                                 |                               |
| Heart failure              | 135                    | 1.00 (0.67, 1.50)                 | 0.91 (0.58, 1.43)                 | 0.96 (0.58, 1.59)               | 1.15 (0.66, 2.01)                 | 0.66 (0.28, 1.52)               | 0.65 (0.24, 1.82)               | 0.63 (0.13, 3.14)                | 2.21 (0.15, 32.28) <sup>b</sup> |                               |

<sup>a</sup>95% CI does not include the null.

<sup>b</sup>This footnote is to designate that only one ED visit related to the indicated health outcome occurred on an exposed day (i.e., an acute heatwave day as defined above) during the study period.

Note: For the acute heatwave analysis, the results of which are reported in this table, a heatwave day was defined as a day on which the observed heat index (HI) was above the indicated threshold as was the HI on the previous day. Days with a HI below the threshold and/or those that were preceded by a daily HI below the threshold were considered non-heatwave days. Conditional logistic regression models adjusted for daily PM<sub>2.5</sub> concentration were used to estimate odds ratios. Abbreviations: COPD, chronic obstructive pulmonary disease.

Table S4d. Odds ratios and 95% confidence intervals for emergency department (ED) visits on heatwave days versus non-heatwave days among non-Alaska Native people in Anchorage, Fairbanks, and the Matanuska-Susitna Valley, Alaska, 2015-2019

| <i>Reason for ED visit</i> | <i>Number of cases</i> | <b>70-degree HI threshold</b>     | <b>72-degree HI threshold</b>    | <b>74-degree HI threshold</b>     | <b>76-degree HI threshold</b>     | <b>78-degree HI threshold</b>      | <b>80-degree HI threshold</b>      | <b>82-degree HI threshold</b>     | <b>84-degree HI threshold</b>     | <b>86-degree HI threshold</b> |
|----------------------------|------------------------|-----------------------------------|----------------------------------|-----------------------------------|-----------------------------------|------------------------------------|------------------------------------|-----------------------------------|-----------------------------------|-------------------------------|
| Heat illness               | 23                     | 14.25 ( 3.28, 61.89) <sup>a</sup> | 7.51 ( 2.66, 21.20) <sup>a</sup> | 11.17 ( 3.93, 31.79) <sup>a</sup> | 20.46 ( 7.19, 58.23) <sup>a</sup> | 42.44 (11.81, 152.54) <sup>a</sup> | 65.86 (14.59, 297.39) <sup>a</sup> | 13.75 ( 3.87, 48.78) <sup>a</sup> | 11.95 ( 1.68, 84.85) <sup>a</sup> |                               |
| Asthma                     | 1907                   | 1.02 (0.91, 1.13)                 | 1.05 (0.93, 1.18)                | 1.07 (0.94, 1.22)                 | 1.08 (0.93, 1.26)                 | 1.11 (0.92, 1.35)                  | 1.04 (0.82, 1.32)                  | 1.08 (0.76, 1.55)                 | 0.68 (0.28, 1.64)                 |                               |
| COPD                       | 1627                   | 1.04 (0.92, 1.16)                 | 1.03 (0.91, 1.17)                | 1.04 (0.90, 1.20)                 | 0.99 (0.83, 1.19)                 | 0.87 (0.69, 1.10)                  | 0.73 (0.53, 1.01)                  | 0.59 (0.34, 1.03)                 | 1.45 (0.57, 3.70)                 |                               |
| Pneumonia                  | 1372                   | 0.96 (0.84, 1.09)                 | 0.94 (0.81, 1.08)                | 0.95 (0.81, 1.12)                 | 0.94 (0.77, 1.14)                 | 1.19 (0.94, 1.51)                  | 1.16 (0.85, 1.58)                  | 1.32 (0.84, 2.06)                 | 1.10 (0.34, 3.64)                 |                               |
| Bronchitis                 | 1301                   | 0.78 (0.68, 0.90) <sup>a</sup>    | 0.85 (0.73, 0.98) <sup>a</sup>   | 0.84 (0.71, 0.99) <sup>a</sup>    | 0.74 (0.60, 0.92) <sup>a</sup>    | 0.73 (0.55, 0.96) <sup>a</sup>     | 0.72 (0.51, 1.02)                  | 0.57 (0.31, 1.03)                 | 1.22 (0.48, 3.10)                 |                               |
| Arrhythmia                 | 1325                   | 1.03 (0.91, 1.18)                 | 1.00 (0.87, 1.15)                | 1.02 (0.86, 1.19)                 | 0.93 (0.76, 1.13)                 | 0.93 (0.72, 1.19)                  | 0.77 (0.54, 1.09)                  | 0.81 (0.47, 1.39)                 | 1.21 (0.42, 3.42)                 |                               |
| Cerebrovascular            | 350                    | 0.98 (0.75, 1.26)                 | 1.01 (0.76, 1.34)                | 1.04 (0.76, 1.43)                 | 0.99 (0.67, 1.45)                 | 1.19 (0.75, 1.88)                  | 0.95 (0.51, 1.77)                  | 1.11 (0.43, 2.86)                 | 0.99 (0.13, 7.74) <sup>b</sup>    |                               |
| Ischemic                   | 156                    | 1.16 (0.79, 1.70)                 | 1.26 (0.83, 1.92)                | 1.57 (1.00, 2.47) <sup>a</sup>    | 1.17 (0.65, 2.09)                 | 0.97 (0.42, 2.21)                  | 1.17 (0.39, 3.52)                  | 2.15 (0.58, 7.96)                 |                                   |                               |
| Myocardial infarction      | 55                     | 2.11 (1.09, 4.08) <sup>a</sup>    | 1.88 (0.89, 3.99)                | 2.48 (1.09, 5.64) <sup>a</sup>    | 2.56 (0.94, 6.97)                 | 1.00 (0.12, 8.59) <sup>b</sup>     |                                    |                                   |                                   |                               |
| Heart failure              | 286                    | 0.71 (0.53, 0.95) <sup>a</sup>    | 0.73 (0.52, 1.02)                | 0.76 (0.52, 1.12)                 | 0.74 (0.46, 1.18)                 | 0.96 (0.54, 1.69)                  | 0.79 (0.36, 1.70)                  | 0.98 (0.29, 3.31)                 | 1.49 (0.18, 12.05) <sup>b</sup>   |                               |

<sup>a</sup>95% CI does not include the null.

<sup>b</sup>This footnote is to designate that only one ED visit related to the indicated health outcome occurred on an exposed day (i.e., an acute heatwave day as defined above) during the study period.

Note: For the acute heatwave analysis, the results of which are reported in this table, a heatwave day was defined as a day on which the observed heat index (HI) was above the indicated threshold as was the HI on the previous day. Days with a HI below the threshold and/or those that were preceded by a daily HI below the threshold were considered non-heatwave days. Conditional logistic regression models adjusted for daily PM<sub>2.5</sub> concentration were used to estimate odds ratios. Abbreviations: COPD, chronic obstructive pulmonary disease.

Table S4e. Odds ratios and 95% confidence intervals for emergency department (ED) visits on heatwave days versus non-heatwave days among <15-year-olds in Anchorage, Fairbanks, and the Matanuska-Susitna Valley, Alaska, 2015-2019

| <i>Reason for ED visit</i> | <i>Number of cases</i> | <b>70-degree HI threshold</b>  | <b>72-degree HI threshold</b>  | <b>74-degree HI threshold</b>     | <b>76-degree HI threshold</b>     | <b>78-degree HI threshold</b>     | <b>80-degree HI threshold</b> | <b>82-degree HI threshold</b> | <b>84-degree HI threshold</b>   | <b>86-degree HI threshold</b> |
|----------------------------|------------------------|--------------------------------|--------------------------------|-----------------------------------|-----------------------------------|-----------------------------------|-------------------------------|-------------------------------|---------------------------------|-------------------------------|
| Heat illness               | 6                      |                                | 7.21 (0.78, 66.44)             | 15.12 (1.62, 141.34) <sup>a</sup> | 20.33 (1.94, 212.65) <sup>a</sup> | 26.37 (2.42, 287.44) <sup>a</sup> |                               |                               |                                 |                               |
| Asthma                     | 523                    | 1.07 (0.87, 1.31)              | 1.15 (0.92, 1.43)              | 0.98 (0.75, 1.27)                 | 0.83 (0.60, 1.15)                 | 0.80 (0.53, 1.22)                 | 0.76 (0.45, 1.30)             | 0.88 (0.37, 2.12)             |                                 |                               |
| COPD                       | 12                     | 0.65 (0.13, 3.32)              | 0.38 (0.04, 3.29) <sup>b</sup> |                                   |                                   |                                   |                               |                               |                                 |                               |
| Pneumonia                  | 330                    | 0.75 (0.56, 0.99) <sup>a</sup> | 0.74 (0.54, 1.02)              | 0.95 (0.67, 1.34)                 | 0.80 (0.51, 1.24)                 | 0.97 (0.56, 1.71)                 | 0.80 (0.37, 1.74)             | 1.50 (0.56, 3.97)             | 1.83 (0.23, 14.85) <sup>b</sup> |                               |
| Bronchitis                 | 402                    | 0.81 (0.63, 1.04)              | 0.83 (0.63, 1.09)              | 0.84 (0.61, 1.15)                 | 0.82 (0.55, 1.22)                 | 1.07 (0.65, 1.76)                 | 0.99 (0.51, 1.93)             | 1.43 (0.54, 3.77)             | 1.57 (0.20, 12.57) <sup>b</sup> |                               |
| Arrhythmia                 | 14                     | 1.16 (0.37, 3.70)              | 0.87 (0.22, 3.46)              | 0.73 (0.14, 3.71)                 | 0.63 (0.07, 5.71) <sup>b</sup>    |                                   |                               |                               |                                 |                               |

<sup>a</sup> 95% CI does not include the null.

<sup>b</sup> This footnote is to designate that only one ED visit related to the indicated health outcome occurred on an exposed day (i.e., an acute heatwave day as defined above) during the study period.

Note: For the acute heatwave analysis, the results of which are reported in this table, a heatwave day was defined as a day on which the observed heat index (HI) was above the indicated threshold as was the HI on the previous day. Days with a HI below the threshold and/or those that were preceded by a daily HI below the threshold were considered non-heatwave days. Conditional logistic regression models adjusted for daily PM<sub>2.5</sub> concentration were used to estimate odds ratios. Abbreviations: COPD, chronic obstructive pulmonary disease.

Table S4f. Odds ratios and 95% confidence intervals for emergency department (ED) visits on heatwave days versus non-heatwave days among 15-65 year-olds in Anchorage, Fairbanks, and the Matanuska-Susitna Valley, Alaska, 2015-2019

| <i>Reason for ED visit</i> | <i>Number of cases</i> | <b>70-degree HI threshold</b>    | <b>72-degree HI threshold</b>   | <b>74-degree HI threshold</b>   | <b>76-degree HI threshold</b>    | <b>78-degree HI threshold</b>    | <b>80-degree HI threshold</b>    | <b>82-degree HI threshold</b>   | <b>84-degree HI threshold</b>    | <b>86-degree HI threshold</b> |
|----------------------------|------------------------|----------------------------------|---------------------------------|---------------------------------|----------------------------------|----------------------------------|----------------------------------|---------------------------------|----------------------------------|-------------------------------|
| Heat illness               | 27                     | 11.51 (3.36, 39.34) <sup>a</sup> | 9.42 (3.40, 26.14) <sup>a</sup> | 8.39 (3.26, 21.64) <sup>a</sup> | 16.47 (5.79, 46.86) <sup>a</sup> | 15.93 (5.38, 47.17) <sup>a</sup> | 15.89 (5.00, 50.49) <sup>a</sup> | 9.31 (2.81, 30.88) <sup>a</sup> | 12.02 (1.69, 85.37) <sup>a</sup> |                               |
| Asthma                     | 2217                   | 1.01 (0.92, 1.12)                | 1.00 (0.90, 1.11)               | 1.04 (0.93, 1.18)               | 1.07 (0.93, 1.24)                | 1.10 (0.92, 1.32)                | 1.05 (0.84, 1.31)                | 1.27 (0.91, 1.75)               | 0.69 (0.28, 1.66)                |                               |
| COPD                       | 1293                   | 0.96 (0.84, 1.10)                | 0.94 (0.81, 1.09)               | 0.93 (0.78, 1.10)               | 0.86 (0.70, 1.06)                | 0.67 (0.50, 0.90) <sup>a</sup>   | 0.53 (0.35, 0.81) <sup>a</sup>   | 0.44 (0.21, 0.90) <sup>a</sup>  | 0.52 (0.07, 3.92) <sup>b</sup>   |                               |
| Pneumonia                  | 1231                   | 0.95 (0.83, 1.09)                | 0.93 (0.79, 1.08)               | 0.95 (0.80, 1.13)               | 1.03 (0.84, 1.26)                | 1.34 (1.06, 1.71) <sup>a</sup>   | 1.32 (0.96, 1.81)                | 1.41 (0.87, 2.28)               | 1.38 (0.41, 4.63)                |                               |
| Bronchitis                 | 1294                   | 0.77 (0.67, 0.88) <sup>a</sup>   | 0.78 (0.67, 0.91) <sup>a</sup>  | 0.77 (0.64, 0.92) <sup>a</sup>  | 0.75 (0.60, 0.93) <sup>a</sup>   | 0.64 (0.47, 0.86) <sup>a</sup>   | 0.63 (0.43, 0.91) <sup>a</sup>   | 0.50 (0.26, 0.96) <sup>a</sup>  | 1.25 (0.49, 3.23)                |                               |
| Arrhythmia                 | 879                    | 1.03 (0.88, 1.21)                | 1.07 (0.90, 1.27)               | 1.00 (0.82, 1.22)               | 1.01 (0.80, 1.29)                | 1.05 (0.77, 1.44)                | 0.80 (0.50, 1.26)                | 1.06 (0.52, 2.13)               | 1.70 (0.39, 7.51)                |                               |
| Cerebrovascular            | 211                    | 0.86 (0.62, 1.21)                | 0.89 (0.61, 1.28)               | 0.97 (0.65, 1.46)               | 1.07 (0.66, 1.72)                | 1.17 (0.66, 2.08)                | 0.86 (0.38, 1.96)                | 0.88 (0.25, 3.12)               | 1.47 (0.16, 13.89) <sup>b</sup>  |                               |
| Ischemic                   | 100                    | 1.32 (0.83, 2.11)                | 1.55 (0.93, 2.56)               | 1.72 (0.99, 3.00)               | 2.64 (1.44, 4.85) <sup>a</sup>   | 2.08 (0.88, 4.90)                | 2.86 (0.90, 9.10)                | 0.82 (0.08, 8.10) <sup>b</sup>  |                                  |                               |
| Myocardial infarction      | 53                     | 1.65 (0.87, 3.11)                | 1.67 (0.82, 3.40)               | 2.13 (0.98, 4.61)               | 3.58 (1.56, 8.23) <sup>a</sup>   | 3.07 (0.86, 10.87)               | 2.75 (0.41, 18.45)               | 1.43 (0.10, 20.84) <sup>b</sup> |                                  |                               |
| Heart failure              | 241                    | 0.73 (0.53, 1.01)                | 0.69 (0.48, 1.00) <sup>a</sup>  | 0.79 (0.52, 1.19)               | 0.91 (0.57, 1.46)                | 0.80 (0.43, 1.48)                | 0.59 (0.25, 1.41)                | 0.59 (0.13, 2.60)               | 7.43 (1.01, 54.77) <sup>a</sup>  |                               |

<sup>a</sup>95% CI does not include the null.

<sup>b</sup>This footnote is to designate that only one ED visit related to the indicated health outcome occurred on an exposed day (i.e., an acute heatwave day as defined above) during the study period.

Note: For the acute heatwave analysis, the results of which are reported in this table, a heatwave day was defined as a day on which the observed heat index (HI) was above the indicated threshold as was the HI on the previous day. Days with a HI below the threshold and/or those that were preceded by a daily HI below the threshold were considered non-heatwave days. Conditional logistic regression models adjusted for daily PM<sub>2.5</sub> concentration were used to estimate odds ratios. Abbreviations: COPD, chronic obstructive pulmonary disease.



Table S4g. Odds ratios and 95% confidence intervals for emergency department (ED) visits on heatwave days versus non-heatwave days among >65-year-olds in Anchorage, Fairbanks, and the Matanuska-Susitna Valley, Alaska, 2015-2019

| <i>Reason for ED visit</i> | <i>Number of cases</i> | <b>70-degree HI threshold</b>   | <b>72-degree HI threshold</b>  | <b>74-degree HI threshold</b>  | <b>76-degree HI threshold</b> | <b>78-degree HI threshold</b> | <b>80-degree HI threshold</b> | <b>82-degree HI threshold</b> | <b>84-degree HI threshold</b>   | <b>86-degree HI threshold</b> |
|----------------------------|------------------------|---------------------------------|--------------------------------|--------------------------------|-------------------------------|-------------------------------|-------------------------------|-------------------------------|---------------------------------|-------------------------------|
| Asthma                     | 171                    | 1.23 (0.87, 1.75)               | 1.15 (0.79, 1.69)              | 1.21 (0.79, 1.87)              | 1.10 (0.66, 1.83)             | 1.23 (0.66, 2.30)             | 1.91 (0.94, 3.88)             | 1.25 (0.35, 4.52)             | 0.90 (0.10, 8.36)               |                               |
| COPD                       | 853                    | 1.00 (0.85, 1.17)               | 1.02 (0.85, 1.21)              | 1.01 (0.83, 1.24)              | 1.12 (0.88, 1.42)             | 1.05 (0.77, 1.41)             | 0.91 (0.61, 1.36)             | 0.84 (0.43, 1.62)             | 1.85 (0.64, 5.40)               |                               |
| Pneumonia                  | 520                    | 0.91 (0.74, 1.12)               | 0.90 (0.71, 1.13)              | 0.81 (0.62, 1.06)              | 0.94 (0.69, 1.30)             | 1.01 (0.67, 1.52)             | 1.18 (0.73, 1.92)             | 1.29 (0.63, 2.63)             |                                 |                               |
| Bronchitis                 | 275                    | 1.01 (0.76, 1.33)               | 0.99 (0.73, 1.35)              | 0.83 (0.58, 1.19)              | 0.64 (0.40, 1.03)             | 0.83 (0.48, 1.45)             | 1.05 (0.56, 1.96)             | 0.47 (0.11, 2.00)             | 1.49 (0.18, 12.08) <sup>b</sup> |                               |
| Arrhythmia                 | 724                    | 0.97 (0.82, 1.16)               | 0.92 (0.76, 1.12)              | 0.96 (0.77, 1.20)              | 0.81 (0.62, 1.07)             | 0.82 (0.58, 1.16)             | 0.65 (0.40, 1.05)             | 0.55 (0.25, 1.19)             | 0.75 (0.17, 3.29)               |                               |
| Cerebrovascular            | 223                    | 1.16 (0.85, 1.60)               | 1.21 (0.85, 1.71)              | 1.22 (0.82, 1.81)              | 1.30 (0.82, 2.05)             | 1.73 (1.00, 2.99)             | 1.45 (0.71, 2.98)             | 1.59 (0.55, 4.60)             |                                 |                               |
| Ischemic                   | 99                     | 1.34 (0.83, 2.14)               | 1.46 (0.88, 2.40)              | 1.71 (1.00, 2.92) <sup>a</sup> | 1.17 (0.59, 2.32)             | 1.19 (0.49, 2.92)             | 1.23 (0.35, 4.34)             | 3.76 (0.90, 15.64)            |                                 |                               |
| Myocardial infarction      | 28                     | 4.20 (1.72, 10.25) <sup>a</sup> | 3.53 (1.36, 9.20) <sup>a</sup> | 2.68 (0.96, 7.43)              | 2.20 (0.65, 7.48)             |                               |                               |                               |                                 |                               |
| Heart failure              | 199                    | 0.87 (0.62, 1.21)               | 0.87 (0.60, 1.27)              | 0.84 (0.54, 1.30)              | 0.82 (0.47, 1.40)             | 0.84 (0.41, 1.72)             | 0.96 (0.42, 2.20)             | 1.43 (0.43, 4.80)             |                                 |                               |

<sup>a</sup>95% CI does not include the null.

<sup>b</sup>This footnote is to designate that only one ED visit related to the indicated health outcome occurred on an exposed day (i.e., an acute heatwave day as defined above) during the study period.

Note: For the acute heatwave analysis, the results of which are reported in this table, a heatwave day was defined as a day on which the observed heat index (HI) was above the indicated threshold as was the HI on the previous day. Days with a HI below the threshold and/or those that were preceded by a daily HI below the threshold were considered non-heatwave days. Conditional logistic regression models adjusted for daily PM<sub>2.5</sub> concentration were used to estimate odds ratios.

Abbreviations: COPD, chronic obstructive pulmonary disease.

Tables S5a-g – Ongoing heatwave analysis stratified by sex, race, and age

Table S5a. Odds ratios and 95% confidence intervals for one additional previous day on which the observed heat index (HI) was above the indicated threshold among females in Anchorage, Fairbanks, and the Matanuska-Susitna Valley, Alaska, 2015-2019

| <i>Reason for ED visit</i> | <i>Number of cases</i> | <b>70-degree HI threshold</b>  | <b>72-degree HI threshold</b>  | <b>74-degree HI threshold</b>  | <b>76-degree HI threshold</b>  | <b>78-degree HI threshold</b>  | <b>80-degree HI threshold</b>  | <b>82-degree HI threshold</b> | <b>84-degree HI threshold</b>     | <b>86-degree HI threshold</b>     |
|----------------------------|------------------------|--------------------------------|--------------------------------|--------------------------------|--------------------------------|--------------------------------|--------------------------------|-------------------------------|-----------------------------------|-----------------------------------|
| Heat illness               | 14                     | 1.03 (0.94, 1.12)              | 1.08 (0.95, 1.23)              | 1.11 (0.96, 1.29)              | 1.50 (1.08, 2.09) <sup>a</sup> | 1.61 (1.09, 2.36) <sup>a</sup> | 2.56 (1.11, 5.89) <sup>a</sup> | 0.27 (0.02, 3.79)             |                                   |                                   |
| Asthma                     | 1651                   | 1.00 (0.99, 1.02)              | 1.01 (0.99, 1.03)              | 1.01 (0.98, 1.03)              | 1.00 (0.96, 1.05)              | 1.03 (0.97, 1.08)              | 1.04 (0.97, 1.12)              | 1.11 (0.96, 1.28)             | 1.27 (0.88, 1.83)                 | 0.66 (0.16, 2.78)                 |
| COPD                       | 1138                   | 0.99 (0.97, 1.01)              | 0.98 (0.96, 1.01)              | 0.98 (0.95, 1.01)              | 0.96 (0.90, 1.01)              | 0.94 (0.87, 1.02)              | 0.87 (0.77, 0.99) <sup>a</sup> | 0.93 (0.74, 1.17)             | 1.07 (0.65, 1.76)                 | 2.77 (0.92, 8.31)                 |
| Pneumonia                  | 999                    | 1.00 (0.98, 1.02)              | 1.00 (0.97, 1.02)              | 1.01 (0.98, 1.05)              | 1.02 (0.97, 1.08)              | 1.06 (0.98, 1.14)              | 1.13 (1.04, 1.24) <sup>a</sup> | 1.16 (0.98, 1.38)             | 1.36 (0.90, 2.04)                 | 1.81 (0.41, 7.99)                 |
| Bronchitis                 | 1130                   | 0.98 (0.97, 1.00)              | 0.97 (0.94, 1.00)              | 0.96 (0.92, 0.99) <sup>a</sup> | 0.96 (0.90, 1.02)              | 0.98 (0.91, 1.06)              | 0.94 (0.84, 1.05)              | 1.00 (0.81, 1.23)             | 1.11 (0.73, 1.69)                 | 1.35 (0.41, 4.47)                 |
| Arrhythmia                 | 676                    | 1.01 (0.98, 1.03)              | 1.01 (0.98, 1.05)              | 1.01 (0.97, 1.05)              | 1.04 (0.98, 1.12)              | 1.00 (0.92, 1.10)              | 1.03 (0.91, 1.16)              | 1.05 (0.83, 1.33)             | 1.03 (0.57, 1.85)                 | 2.16 (0.48, 9.79)                 |
| Cerebrovascular            | 207                    | 1.00 (0.96, 1.04)              | 1.02 (0.96, 1.08)              | 1.02 (0.95, 1.09)              | 1.02 (0.90, 1.16)              | 1.00 (0.84, 1.18)              | 0.91 (0.68, 1.23)              | 0.85 (0.51, 1.42)             |                                   |                                   |
| Ischemic                   | 62                     | 1.08 (1.02, 1.15) <sup>a</sup> | 1.12 (1.02, 1.22) <sup>a</sup> | 1.13 (1.03, 1.26) <sup>a</sup> | 1.22 (1.02, 1.45) <sup>a</sup> | 1.18 (0.96, 1.44)              | 1.32 (1.05, 1.65) <sup>a</sup> | 1.16 (0.73, 1.86)             | 17.17 (2.87, 102.76) <sup>a</sup> | 24.16 (2.16, 270.46) <sup>a</sup> |
| Myocardial infarction      | 21                     | 1.14 (1.02, 1.29) <sup>a</sup> | 1.13 (0.94, 1.35)              | 1.13 (0.92, 1.39)              | 0.97 (0.69, 1.35)              | 0.87 (0.55, 1.36)              | 1.25 (0.77, 2.04)              |                               |                                   |                                   |
| Heart failure              | 162                    | 1.01 (0.97, 1.04)              | 1.01 (0.95, 1.08)              | 1.00 (0.93, 1.08)              | 0.97 (0.85, 1.12)              | 1.07 (0.92, 1.25)              | 1.02 (0.82, 1.26)              | 0.92 (0.53, 1.60)             | 0.53 (0.08, 3.36)                 | 2.19 (0.25, 18.94)                |

<sup>a</sup>95% CI does not include the null.

Note: For the ongoing heatwave analysis, the results of which are reported in this table, the effect of prolonged elevated HI was estimated via a linear variable in the model that represented the number of previous consecutive days on which the observed HI was above the relevant threshold. An indicator variable was also included to control for same-day elevated HI. As with the threshold analysis, a value of '1' indicated that the same-day HI was above the relevant threshold and a value of '0' indicated that the same-day HI was below the relevant threshold. Conditional logistic regression models adjusted for daily PM<sub>2.5</sub> concentration were used to estimate odds ratios. Abbreviations: COPD, chronic obstructive pulmonary disease.

Table S5b. Odds ratios and 95% confidence intervals for one additional previous day on which the observed heat index (HI) was above the indicated threshold among males in Anchorage, Fairbanks, and the Matanuska-Susitna Valley, Alaska, 2015-2019

| <i>Reason for ED visit</i> | <i>Number of cases</i> | <b>70-degree HI threshold</b> | <b>72-degree HI threshold</b>  | <b>74-degree HI threshold</b>  | <b>76-degree HI threshold</b>  | <b>78-degree HI threshold</b>  | <b>80-degree HI threshold</b> | <b>82-degree HI threshold</b> | <b>84-degree HI threshold</b> | <b>86-degree HI threshold</b> |
|----------------------------|------------------------|-------------------------------|--------------------------------|--------------------------------|--------------------------------|--------------------------------|-------------------------------|-------------------------------|-------------------------------|-------------------------------|
| Heat illness               | 21                     | 1.07 (0.98, 1.18)             | 1.06 (0.95, 1.19)              | 1.05 (0.92, 1.21)              | 0.96 (0.67, 1.38)              | 0.93 (0.62, 1.38)              | 0.93 (0.54, 1.59)             | 2.05 (0.49, 8.63)             | 3.20 (0.96, 10.65)            |                               |
| Asthma                     | 1260                   | 1.01 (0.99, 1.02)             | 1.01 (0.98, 1.03)              | 1.00 (0.98, 1.03)              | 1.00 (0.95, 1.05)              | 0.99 (0.93, 1.05)              | 1.03 (0.95, 1.13)             | 0.94 (0.77, 1.14)             | 0.78 (0.45, 1.33)             | 0.84 (0.20, 3.57)             |
| COPD                       | 1020                   | 0.99 (0.98, 1.01)             | 0.98 (0.96, 1.01)              | 0.99 (0.95, 1.02)              | 0.99 (0.93, 1.06)              | 0.91 (0.83, 1.01)              | 0.91 (0.79, 1.04)             | 0.84 (0.63, 1.11)             | 0.71 (0.37, 1.36)             |                               |
| Pneumonia                  | 1082                   | 1.00 (0.98, 1.02)             | 0.99 (0.96, 1.02)              | 0.98 (0.95, 1.01)              | 1.00 (0.94, 1.06)              | 1.00 (0.93, 1.08)              | 0.97 (0.87, 1.08)             | 1.02 (0.83, 1.25)             | 1.14 (0.74, 1.76)             |                               |
| Bronchitis                 | 842                    | 0.99 (0.97, 1.01)             | 0.97 (0.93, 1.00) <sup>a</sup> | 0.96 (0.92, 1.00) <sup>a</sup> | 0.92 (0.85, 0.99) <sup>a</sup> | 0.90 (0.81, 0.99) <sup>a</sup> | 0.86 (0.74, 1.00)             | 0.83 (0.62, 1.10)             | 0.72 (0.37, 1.38)             | 0.43 (0.06, 3.17)             |
| Arrhythmia                 | 941                    | 1.00 (0.98, 1.02)             | 1.00 (0.98, 1.03)              | 0.99 (0.96, 1.02)              | 0.98 (0.92, 1.04)              | 1.03 (0.96, 1.11)              | 0.98 (0.88, 1.09)             | 1.00 (0.81, 1.24)             | 0.93 (0.49, 1.75)             | 2.44 (0.53, 11.15)            |
| Cerebrovascular            | 227                    | 0.96 (0.92, 1.00)             | 0.95 (0.89, 1.01)              | 0.96 (0.89, 1.03)              | 0.98 (0.87, 1.11)              | 0.98 (0.83, 1.15)              | 0.99 (0.80, 1.22)             | 0.58 (0.27, 1.21)             | 0.30 (0.05, 1.96)             |                               |
| Ischemic                   | 138                    | 1.00 (0.95, 1.06)             | 1.03 (0.97, 1.11)              | 1.00 (0.92, 1.09)              | 0.92 (0.78, 1.10)              | 0.98 (0.78, 1.22)              | 0.98 (0.74, 1.31)             | 0.96 (0.51, 1.79)             |                               |                               |
| Myocardial infarction      | 61                     | 1.05 (0.97, 1.12)             | 1.07 (0.97, 1.18)              | 1.07 (0.96, 1.20)              | 0.96 (0.77, 1.20)              | 1.03 (0.79, 1.34)              | 1.09 (0.81, 1.47)             | 1.38 (0.74, 2.59)             |                               |                               |
| Heart failure              | 279                    | 0.99 (0.95, 1.03)             | 1.00 (0.94, 1.06)              | 0.99 (0.92, 1.07)              | 0.97 (0.85, 1.10)              | 0.94 (0.78, 1.13)              | 0.91 (0.69, 1.19)             | 1.03 (0.69, 1.54)             | 0.41 (0.07, 2.48)             | 1.63 (0.19, 13.72)            |

<sup>a</sup> 95% CI does not include the null.

Note: For the ongoing heatwave analysis, the results of which are reported in this table, the effect of prolonged elevated HI was estimated via a linear variable in the model that represented the number of previous consecutive days on which the observed HI was above the relevant threshold. An indicator variable was also included to control for same-day elevated HI. As with the threshold analysis, a value of '1' indicated that the same-day HI was above the relevant threshold and a value of '0' indicated that the same-day HI was below the relevant threshold. Conditional logistic regression models adjusted for daily PM<sub>2.5</sub> concentration were used to estimate odds ratios. Abbreviations: COPD, chronic obstructive pulmonary disease.

Table S5c. Odds ratios and 95% confidence intervals for one additional previous day on which the observed heat index (HI) was above the indicated threshold among Alaska Native people in Anchorage, Fairbanks, and the Matanuska-Susitna Valley, Alaska, 2015-2019

| <i>Reason for ED visit</i> | <i>Number of cases</i> | <b>70-degree HI threshold</b> | <b>72-degree HI threshold</b>  | <b>74-degree HI threshold</b>  | <b>76-degree HI threshold</b> | <b>78-degree HI threshold</b> | <b>80-degree HI threshold</b>  | <b>82-degree HI threshold</b> | <b>84-degree HI threshold</b> | <b>86-degree HI threshold</b> |
|----------------------------|------------------------|-------------------------------|--------------------------------|--------------------------------|-------------------------------|-------------------------------|--------------------------------|-------------------------------|-------------------------------|-------------------------------|
| Heat illness               | 10                     | 1.07 (0.86, 1.33)             | 0.99 (0.77, 1.28)              | 1.02 (0.78, 1.33)              | 0.81 (0.38, 1.73)             | 0.45 (0.10, 2.12)             | 0.45 (0.11, 1.79)              | 0.64 (0.01, 33.52)            |                               |                               |
| Asthma                     | 920                    | 1.01 (0.99, 1.03)             | 1.02 (0.99, 1.05)              | 1.02 (0.98, 1.05)              | 1.00 (0.94, 1.06)             | 1.02 (0.95, 1.10)             | 1.08 (0.98, 1.19)              | 1.11 (0.89, 1.38)             | 1.36 (0.77, 2.39)             |                               |
| COPD                       | 477                    | 0.98 (0.95, 1.01)             | 0.97 (0.93, 1.02)              | 0.97 (0.93, 1.03)              | 1.00 (0.92, 1.09)             | 0.89 (0.78, 1.03)             | 0.84 (0.68, 1.04)              | 0.87 (0.59, 1.29)             | 0.80 (0.28, 2.27)             |                               |
| Pneumonia                  | 625                    | 1.01 (0.98, 1.03)             | 1.01 (0.97, 1.04)              | 1.00 (0.96, 1.05)              | 1.04 (0.96, 1.12)             | 1.02 (0.91, 1.13)             | 1.02 (0.88, 1.17)              | 1.13 (0.87, 1.47)             | 1.42 (0.82, 2.47)             | 1.97 (0.24, 16.30)            |
| Bronchitis                 | 597                    | 0.99 (0.97, 1.02)             | 0.99 (0.95, 1.03)              | 0.97 (0.93, 1.02)              | 1.01 (0.93, 1.09)             | 1.02 (0.92, 1.13)             | 0.98 (0.84, 1.13)              | 1.23 (0.94, 1.61)             | 1.16 (0.55, 2.44)             |                               |
| Arrhythmia                 | 222                    | 1.00 (0.96, 1.05)             | 1.01 (0.95, 1.07)              | 1.03 (0.96, 1.09)              | 1.10 (0.99, 1.21)             | 1.12 (0.99, 1.27)             | 0.89 (0.67, 1.18)              | 0.66 (0.31, 1.42)             |                               |                               |
| Cerebrovascular            | 62                     | 0.97 (0.91, 1.04)             | 0.99 (0.88, 1.10)              | 0.98 (0.86, 1.12)              | 1.04 (0.84, 1.29)             | 1.11 (0.89, 1.40)             | 1.16 (0.88, 1.54)              | 1.08 (0.39, 2.96)             |                               |                               |
| Ischemic                   | 35                     | 1.06 (0.98, 1.15)             | 1.12 (1.00, 1.25) <sup>a</sup> | 1.18 (1.04, 1.33) <sup>a</sup> | 1.12 (0.92, 1.38)             | 1.08 (0.85, 1.39)             | 1.05 (0.76, 1.44)              | 0.92 (0.37, 2.29)             | 2.34 (0.38, 14.41)            |                               |
| Myocardial infarction      | 20                     | 1.05 (0.94, 1.17)             | 1.07 (0.92, 1.25)              | 1.19 (0.98, 1.45)              | 1.03 (0.78, 1.36)             | 1.06 (0.77, 1.47)             | 1.08 (0.73, 1.59)              | 1.30 (0.55, 3.12)             | 10.19 (0.63, 164.48)          |                               |
| Heart failure              | 135                    | 1.03 (0.99, 1.06)             | 1.04 (0.98, 1.11)              | 1.03 (0.96, 1.11)              | 1.06 (0.93, 1.21)             | 1.13 (0.95, 1.33)             | 1.23 (1.02, 1.49) <sup>a</sup> | 1.47 (0.91, 2.35)             | 0.43 (0.05, 3.64)             | 3.02 (0.31, 29.42)            |

<sup>a</sup>95% CI does not include the null.

Note: For the ongoing heatwave analysis, the results of which are reported in this table, the effect of prolonged elevated HI was estimated via a linear variable in the model that represented the number of previous consecutive days on which the observed HI was above the relevant threshold. An indicator variable was also included to control for same-day elevated HI. As with the threshold analysis, a value of '1' indicated that the same-day HI was above the relevant threshold and a value of '0' indicated that the same-day HI was below the relevant threshold. Conditional logistic regression models adjusted for daily PM<sub>2.5</sub> concentration were used to estimate odds ratios. Abbreviations: COPD, chronic obstructive pulmonary disease.

Table S5d. Odds ratios and 95% confidence intervals for one additional previous day on which the observed heat index (HI) was above the indicated threshold among non-Alaska Native people in Anchorage, Fairbanks, and the Matanuska-Susitna Valley, Alaska, 2015-2019

| <i>Reason for ED visit</i> | <i>Number of cases</i> | <b>70-degree HI threshold</b> | <b>72-degree HI threshold</b>  | <b>74-degree HI threshold</b>  | <b>76-degree HI threshold</b>  | <b>78-degree HI threshold</b>  | <b>80-degree HI threshold</b>  | <b>82-degree HI threshold</b> | <b>84-degree HI threshold</b>   | <b>86-degree HI threshold</b>   |
|----------------------------|------------------------|-------------------------------|--------------------------------|--------------------------------|--------------------------------|--------------------------------|--------------------------------|-------------------------------|---------------------------------|---------------------------------|
| Heat illness               | 23                     | 1.05 (0.98, 1.12)             | 1.10 (1.01, 1.21) <sup>a</sup> | 1.11 (1.00, 1.24)              | 1.31 (1.03, 1.68) <sup>a</sup> | 1.31 (1.00, 1.72)              | 1.60 (1.05, 2.43) <sup>a</sup> | 1.13 (0.34, 3.74)             | 3.55 (1.07, 11.82) <sup>a</sup> |                                 |
| Asthma                     | 1907                   | 1.01 (0.99, 1.02)             | 1.01 (0.99, 1.02)              | 1.01 (0.98, 1.03)              | 1.01 (0.97, 1.05)              | 1.01 (0.96, 1.06)              | 1.02 (0.96, 1.09)              | 1.01 (0.88, 1.16)             | 0.96 (0.67, 1.38)               | 1.00 (0.36, 2.81)               |
| COPD                       | 1627                   | 1.00 (0.98, 1.01)             | 0.99 (0.97, 1.01)              | 0.98 (0.96, 1.01)              | 0.97 (0.92, 1.01)              | 0.94 (0.88, 1.01)              | 0.90 (0.82, 1.00)              | 0.88 (0.72, 1.08)             | 0.90 (0.59, 1.37)               | 1.46 (0.52, 4.14)               |
| Pneumonia                  | 1372                   | 1.00 (0.98, 1.01)             | 0.99 (0.96, 1.01)              | 0.99 (0.97, 1.02)              | 1.00 (0.95, 1.05)              | 1.02 (0.96, 1.09)              | 1.05 (0.97, 1.14)              | 1.07 (0.91, 1.25)             | 1.21 (0.85, 1.71)               | 0.51 (0.07, 3.80)               |
| Bronchitis                 | 1301                   | 0.99 (0.97, 1.00)             | 0.96 (0.94, 0.99) <sup>a</sup> | 0.95 (0.92, 0.98) <sup>a</sup> | 0.91 (0.86, 0.97) <sup>a</sup> | 0.91 (0.85, 0.98) <sup>a</sup> | 0.87 (0.78, 0.98) <sup>a</sup> | 0.81 (0.65, 1.01)             | 0.90 (0.60, 1.35)               | 1.11 (0.40, 3.11)               |
| Arrhythmia                 | 1325                   | 1.00 (0.99, 1.02)             | 1.01 (0.99, 1.03)              | 0.99 (0.97, 1.02)              | 0.99 (0.94, 1.04)              | 1.00 (0.94, 1.07)              | 1.02 (0.93, 1.11)              | 1.06 (0.91, 1.25)             | 1.13 (0.73, 1.74)               | 2.70 (0.91, 7.99)               |
| Cerebrovascular            | 350                    | 0.98 (0.95, 1.01)             | 0.98 (0.93, 1.03)              | 0.99 (0.94, 1.05)              | 0.98 (0.88, 1.08)              | 0.94 (0.82, 1.08)              | 0.82 (0.64, 1.05)              | 0.70 (0.44, 1.11)             | 0.24 (0.04, 1.51)               |                                 |
| Ischemic                   | 156                    | 1.02 (0.98, 1.07)             | 1.03 (0.97, 1.10)              | 1.00 (0.92, 1.09)              | 0.93 (0.79, 1.11)              | 1.01 (0.82, 1.23)              | 1.09 (0.85, 1.40)              | 1.07 (0.68, 1.69)             | 1.93 (0.86, 4.36)               | 6.65 (1.20, 36.94) <sup>a</sup> |
| Myocardial infarction      | 55                     | 1.08 (0.99, 1.17)             | 1.08 (0.96, 1.22)              | 1.06 (0.91, 1.22)              | 0.73 (0.46, 1.16)              | 0.59 (0.21, 1.65)              |                                |                               |                                 |                                 |
| Heart failure              | 286                    | 0.97 (0.94, 1.01)             | 0.98 (0.92, 1.04)              | 0.97 (0.90, 1.04)              | 0.91 (0.79, 1.04)              | 0.95 (0.80, 1.12)              | 0.71 (0.51, 1.00)              | 0.78 (0.46, 1.33)             | 0.44 (0.08, 2.43)               | 1.47 (0.18, 11.92)              |

<sup>a</sup>95% CI does not include the null.

Note: For the ongoing heatwave analysis, the results of which are reported in this table, the effect of prolonged elevated HI was estimated via a linear variable in the model that represented the number of previous consecutive days on which the observed HI was above the relevant threshold. An indicator variable was also included to control for same-day elevated HI. As with the threshold analysis, a value of '1' indicated that the same-day HI was above the relevant threshold and a value of '0' indicated that the same-day HI was below the relevant threshold. Conditional logistic regression models adjusted for daily PM<sub>2.5</sub> concentration were used to estimate odds ratios. Abbreviations: COPD, chronic obstructive pulmonary disease.

Table S5e. Odds ratios and 95% confidence intervals for one additional previous day on which the observed heat index (HI) was above the indicated threshold among <15 year-olds in Anchorage, Fairbanks, and the Matanuska-Susitna Valley, Alaska, 2015-2019

| <i>Reason for ED visit</i> | <i>Number of cases</i> | <b>70-degree HI threshold</b> | <b>72-degree HI threshold</b> | <b>74-degree HI threshold</b> | <b>76-degree HI threshold</b> | <b>78-degree HI threshold</b> | <b>80-degree HI threshold</b> | <b>82-degree HI threshold</b> | <b>84-degree HI threshold</b> | <b>86-degree HI threshold</b> |
|----------------------------|------------------------|-------------------------------|-------------------------------|-------------------------------|-------------------------------|-------------------------------|-------------------------------|-------------------------------|-------------------------------|-------------------------------|
| Heat illness               | 6                      | 1.01 (0.89, 1.15)             | 1.02 (0.84, 1.24)             | 1.05 (0.85, 1.29)             | 1.12 (0.71, 1.79)             | 1.18 (0.58, 2.41)             |                               | 1.17 (0.05, 27.65)            |                               |                               |
| Asthma                     | 523                    | 0.99 (0.96, 1.02)             | 0.99 (0.95, 1.02)             | 0.99 (0.95, 1.03)             | 0.96 (0.88, 1.04)             | 0.94 (0.84, 1.05)             | 0.92 (0.78, 1.08)             | 0.98 (0.73, 1.32)             | 0.54 (0.15, 1.87)             |                               |
| COPD                       | 12                     | 0.85 (0.57, 1.28)             | 0.45 (0.15, 1.39)             |                               |                               |                               |                               |                               |                               |                               |
| Pneumonia                  | 330                    | 1.01 (0.98, 1.05)             | 1.02 (0.98, 1.07)             | 1.03 (0.98, 1.09)             | 1.08 (0.98, 1.20)             | 1.03 (0.88, 1.20)             | 1.00 (0.82, 1.22)             | 1.17 (0.80, 1.69)             | 1.12 (0.46, 2.69)             | 2.76 (0.32, 23.77)            |
| Bronchitis                 | 402                    | 0.99 (0.96, 1.02)             | 0.99 (0.94, 1.04)             | 0.99 (0.93, 1.04)             | 0.99 (0.89, 1.09)             | 0.97 (0.84, 1.12)             | 0.86 (0.69, 1.08)             | 0.93 (0.61, 1.41)             | 1.10 (0.47, 2.61)             | 1.72 (0.21, 13.83)            |
| Arrhythmia                 | 14                     | 0.75 (0.50, 1.11)             | 0.76 (0.48, 1.20)             | 0.59 (0.25, 1.43)             | 0.59 (0.21, 1.66)             | 0.77 (0.26, 2.25)             |                               |                               |                               |                               |

Note: All 95% CI's in this table included the null. For the ongoing heatwave analysis, the results of which are reported in this table, the effect of prolonged elevated HI was estimated via a linear variable in the model that represented the number of previous consecutive days on which the observed HI was above the relevant threshold. An indicator variable was also included to control for same-day elevated HI. As with the threshold analysis, a value of '1' indicated that the same-day HI was above the relevant threshold and a value of '0' indicated that the same-day HI was below the relevant threshold. Conditional logistic regression models adjusted for daily PM<sub>2.5</sub> concentration were used to estimate odds ratios. Abbreviations: COPD, chronic obstructive pulmonary disease.

Table S5f. Odds ratios and 95% confidence intervals for one additional previous day on which the observed heat index (HI) was above the indicated threshold among 15-65 year olds in Anchorage, Fairbanks, and the Matanuska-Susitna Valley, Alaska, 2015-2019

| <i>Reason for ED visit</i> | <i>Number of cases</i> | <b>70-degree HI threshold</b>  | <b>72-degree HI threshold</b>  | <b>74-degree HI threshold</b>  | <b>76-degree HI threshold</b> | <b>78-degree HI threshold</b> | <b>80-degree HI threshold</b> | <b>82-degree HI threshold</b> | <b>84-degree HI threshold</b>   | <b>86-degree HI threshold</b>    |
|----------------------------|------------------------|--------------------------------|--------------------------------|--------------------------------|-------------------------------|-------------------------------|-------------------------------|-------------------------------|---------------------------------|----------------------------------|
| Heat illness               | 27                     | 1.04 (0.96, 1.12)              | 1.05 (0.94, 1.17)              | 1.06 (0.94, 1.21)              | 1.17 (0.86, 1.60)             | 1.16 (0.84, 1.61)             | 1.33 (0.91, 1.93)             | 2.01 (0.49, 8.30)             | 4.30 (1.00, 18.51) <sup>a</sup> |                                  |
| Asthma                     | 2217                   | 1.01 (0.99, 1.02)              | 1.01 (0.99, 1.03)              | 1.01 (0.99, 1.03)              | 1.00 (0.96, 1.04)             | 1.01 (0.96, 1.05)             | 1.03 (0.97, 1.10)             | 1.04 (0.91, 1.19)             | 1.15 (0.83, 1.58)               | 0.96 (0.34, 2.69)                |
| COPD                       | 1293                   | 1.00 (0.98, 1.01)              | 1.00 (0.97, 1.02)              | 0.99 (0.96, 1.02)              | 0.96 (0.91, 1.02)             | 0.93 (0.86, 1.01)             | 0.91 (0.81, 1.02)             | 0.86 (0.66, 1.12)             | 0.56 (0.26, 1.20)               | 0.78 (0.10, 5.92)                |
| Pneumonia                  | 1231                   | 1.00 (0.98, 1.01)              | 0.99 (0.97, 1.02)              | 0.99 (0.96, 1.02)              | 0.99 (0.94, 1.05)             | 1.03 (0.96, 1.10)             | 1.04 (0.95, 1.13)             | 1.09 (0.92, 1.30)             | 1.38 (0.96, 1.97)               | 0.74 (0.10, 5.60)                |
| Bronchitis                 | 1294                   | 0.99 (0.97, 1.00)              | 0.97 (0.94, 1.00) <sup>a</sup> | 0.96 (0.93, 0.99) <sup>a</sup> | 0.96 (0.91, 1.02)             | 0.97 (0.90, 1.04)             | 0.95 (0.86, 1.06)             | 0.98 (0.80, 1.19)             | 0.90 (0.57, 1.43)               | 0.89 (0.28, 2.90)                |
| Arrhythmia                 | 879                    | 1.01 (1.00, 1.03)              | 1.02 (1.00, 1.05)              | 1.01 (0.98, 1.05)              | 1.03 (0.97, 1.09)             | 1.06 (0.99, 1.14)             | 1.02 (0.92, 1.13)             | 1.09 (0.91, 1.31)             | 1.30 (0.77, 2.19)               | 3.67 (1.01, 13.37) <sup>a</sup>  |
| Cerebrovascular            | 211                    | 0.98 (0.94, 1.02)              | 0.95 (0.89, 1.02)              | 0.95 (0.88, 1.03)              | 0.99 (0.88, 1.11)             | 0.99 (0.85, 1.15)             | 1.05 (0.87, 1.28)             | 0.97 (0.62, 1.53)             | 0.40 (0.07, 2.35)               |                                  |
| Ischemic                   | 100                    | 1.04 (0.99, 1.09)              | 1.09 (1.02, 1.18) <sup>a</sup> | 1.04 (0.95, 1.14)              | 1.03 (0.88, 1.21)             | 1.16 (0.97, 1.40)             | 1.21 (0.99, 1.49)             | 1.03 (0.58, 1.82)             | 1.31 (0.32, 5.34)               |                                  |
| Myocardial infarction      | 53                     | 1.09 (1.01, 1.17) <sup>a</sup> | 1.13 (1.01, 1.26) <sup>a</sup> | 1.13 (0.99, 1.28)              | 1.02 (0.83, 1.26)             | 1.13 (0.89, 1.43)             | 1.22 (0.95, 1.56)             | 1.28 (0.78, 2.10)             | 1.48 (0.36, 6.16)               |                                  |
| Heart failure              | 241                    | 1.02 (0.99, 1.05)              | 1.05 (1.00, 1.11) <sup>a</sup> | 1.03 (0.97, 1.09)              | 1.03 (0.92, 1.15)             | 1.07 (0.92, 1.24)             | 1.10 (0.91, 1.32)             | 1.20 (0.83, 1.73)             | 0.86 (0.25, 2.99)               | 10.40 (1.38, 78.20) <sup>a</sup> |

<sup>a</sup>95% CI does not include the null.

Note: For the ongoing heatwave analysis, the results of which are reported in this table, the effect of prolonged elevated HI was estimated via a linear variable in the model that represented the number of previous consecutive days on which the observed HI was above the relevant threshold. An indicator variable was also included to control for same-day elevated HI. As with the threshold analysis, a value of '1' indicated that the same-day HI was above the relevant threshold and a value of '0' indicated that the same-day HI was below the relevant threshold. Conditional logistic regression models adjusted for daily PM<sub>2.5</sub> concentration were used to estimate odds ratios. Abbreviations: COPD, chronic obstructive pulmonary disease.

Table S5g. Odds ratios and 95% confidence intervals for one additional previous day on which the observed heat index (HI) was above the indicated threshold among >65 year-olds in Anchorage, Fairbanks, and the Matanuska-Susitna Valley, Alaska, 2015-2019

| <i>Reason for ED visit</i> | <i>Number of cases</i> | <b>70-degree HI threshold</b> | <b>72-degree HI threshold</b>  | <b>74-degree HI threshold</b>  | <b>76-degree HI threshold</b>  | <b>78-degree HI threshold</b>  | <b>80-degree HI threshold</b>  | <b>82-degree HI threshold</b> | <b>84-degree HI threshold</b>  | <b>86-degree HI threshold</b>   |
|----------------------------|------------------------|-------------------------------|--------------------------------|--------------------------------|--------------------------------|--------------------------------|--------------------------------|-------------------------------|--------------------------------|---------------------------------|
| Asthma                     | 171                    | 1.03 (0.99, 1.08)             | 1.03 (0.97, 1.10)              | 1.03 (0.96, 1.11)              | 1.11 (1.00, 1.24)              | 1.19 (1.05, 1.36) <sup>a</sup> | 1.33 (1.13, 1.57) <sup>a</sup> | 1.18 (0.80, 1.75)             | 0.56 (0.10, 3.08)              |                                 |
| COPD                       | 853                    | 0.99 (0.97, 1.01)             | 0.97 (0.94, 1.00) <sup>a</sup> | 0.97 (0.93, 1.00)              | 0.99 (0.93, 1.05)              | 0.93 (0.85, 1.03)              | 0.87 (0.75, 1.00) <sup>a</sup> | 0.89 (0.70, 1.14)             | 1.19 (0.74, 1.91)              | 1.61 (0.48, 5.41)               |
| Pneumonia                  | 520                    | 0.99 (0.97, 1.02)             | 0.98 (0.95, 1.02)              | 0.99 (0.95, 1.04)              | 1.01 (0.94, 1.09)              | 1.03 (0.93, 1.13)              | 1.11 (0.99, 1.26)              | 1.09 (0.86, 1.37)             | 1.04 (0.55, 1.96)              |                                 |
| Bronchitis                 | 275                    | 0.98 (0.94, 1.01)             | 0.95 (0.89, 1.00)              | 0.91 (0.85, 0.99) <sup>a</sup> | 0.80 (0.68, 0.93) <sup>a</sup> | 0.81 (0.68, 0.98) <sup>a</sup> | 0.76 (0.59, 0.99) <sup>a</sup> | 0.71 (0.43, 1.16)             | 0.97 (0.47, 2.03)              |                                 |
| Arrhythmia                 | 724                    | 0.98 (0.96, 1.01)             | 0.99 (0.96, 1.02)              | 0.98 (0.94, 1.02)              | 0.97 (0.91, 1.04)              | 0.97 (0.89, 1.07)              | 0.98 (0.86, 1.12)              | 0.94 (0.71, 1.26)             | 0.66 (0.31, 1.44)              | 1.18 (0.15, 9.21)               |
| Cerebrovascular            | 223                    | 0.99 (0.95, 1.03)             | 1.01 (0.95, 1.07)              | 1.02 (0.95, 1.09)              | 1.00 (0.88, 1.14)              | 0.98 (0.82, 1.17)              | 0.80 (0.57, 1.11)              | 0.48 (0.22, 1.03)             |                                |                                 |
| Ischemic                   | 99                     | 1.03 (0.97, 1.10)             | 1.04 (0.96, 1.12)              | 1.05 (0.96, 1.15)              | 1.05 (0.89, 1.23)              | 1.02 (0.82, 1.28)              | 1.12 (0.84, 1.48)              | 1.26 (0.79, 2.03)             | 2.66 (1.06, 6.67) <sup>a</sup> | 9.35 (1.52, 57.67) <sup>a</sup> |
| Myocardial infarction      | 28                     | 1.07 (0.95, 1.19)             | 1.05 (0.91, 1.22)              | 1.04 (0.88, 1.24)              | 0.89 (0.60, 1.32)              | 0.50 (0.12, 2.15)              |                                |                               |                                |                                 |
| Heart failure              | 199                    | 0.96 (0.92, 1.01)             | 0.91 (0.83, 0.99) <sup>a</sup> | 0.94 (0.85, 1.04)              | 0.86 (0.72, 1.02)              | 0.91 (0.74, 1.12)              | 0.73 (0.52, 1.04)              | 0.68 (0.34, 1.37)             |                                |                                 |

<sup>a</sup>95% CI does not include the null.

Note: For the ongoing heatwave analysis, the results of which are reported in this table, the effect of prolonged elevated HI was estimated via a linear variable in the model that represented the number of previous consecutive days on which the observed HI was above the relevant threshold. An indicator variable was also included to control for same-day elevated HI. As with the threshold analysis, a value of '1' indicated that the same-day HI was above the relevant threshold and a value of '0' indicated that the same-day HI was below the relevant threshold. Conditional logistic regression models adjusted for daily PM<sub>2.5</sub> concentration were used to estimate odds ratios. Abbreviations: COPD, chronic obstructive pulmonary disease.



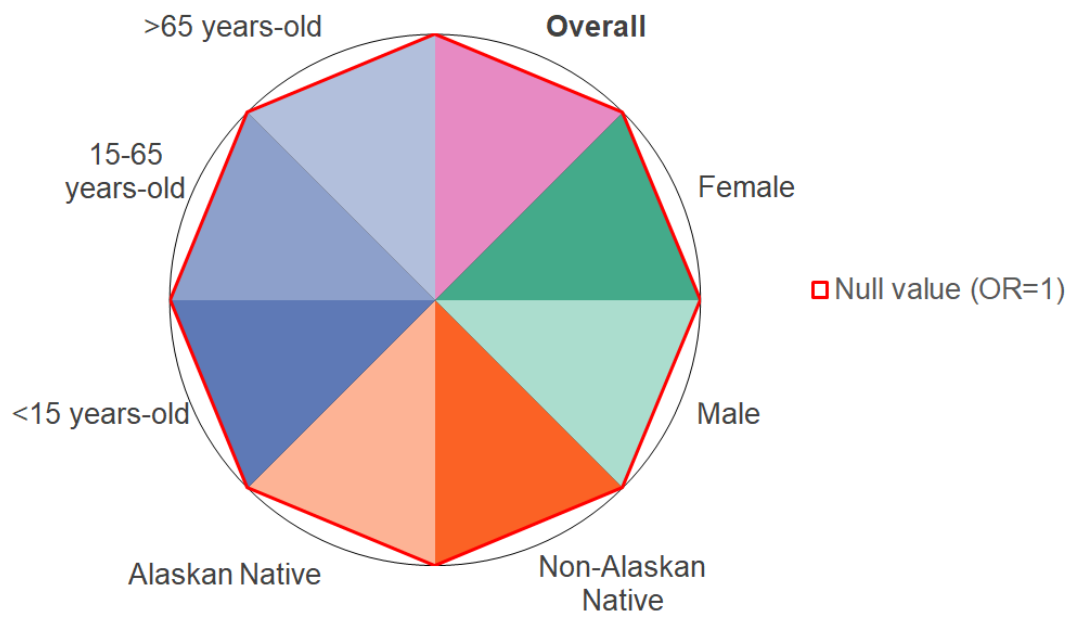

Figure S1. Legend for all Supplemental Figures

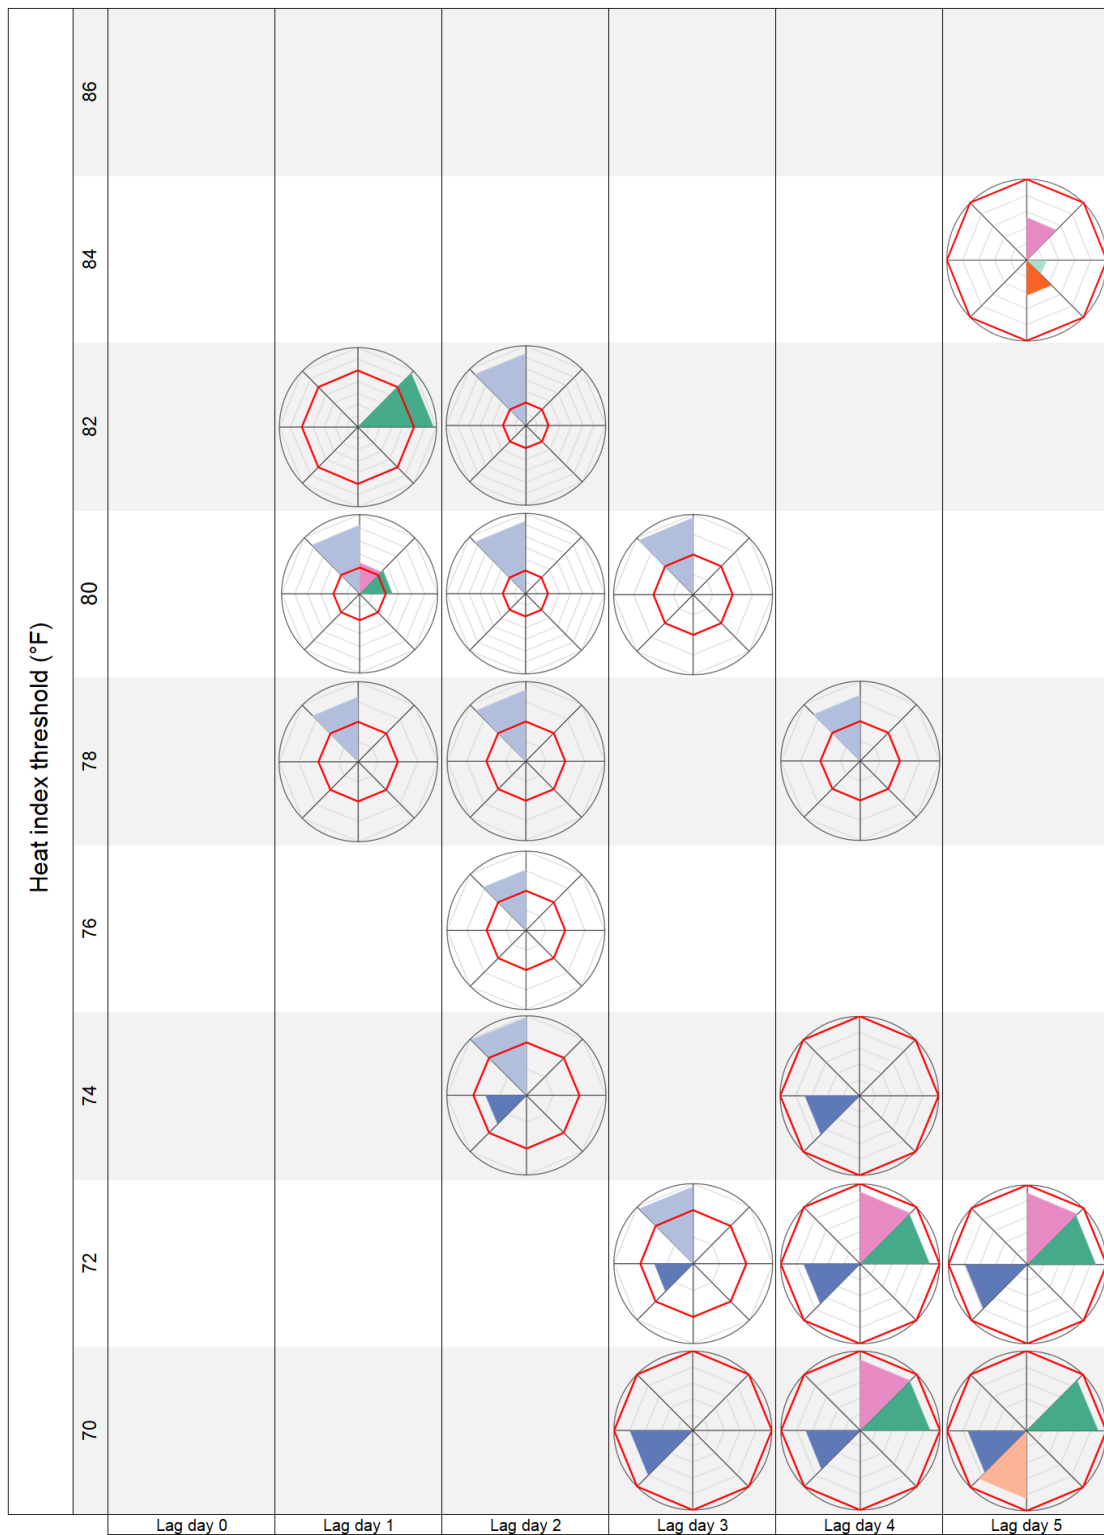

Figure S2. Significant odds ratios (95% CI does not include the null) for asthma-related emergency department visits by demographic group on days above vs. below the Heat Index (HI) threshold, in Anchorage, Fairbanks, and the Matanuska-Susitna Valley, Alaska, 2015- 2019. Conditional logistic regression models adjusted for daily  $PM_{2.5}$  concentration were used to estimate odds ratios. See Figure S1 for legend. Data for this figure can be found in Tables S1a-1, Tables S2a-l, and Tables S3a-r.

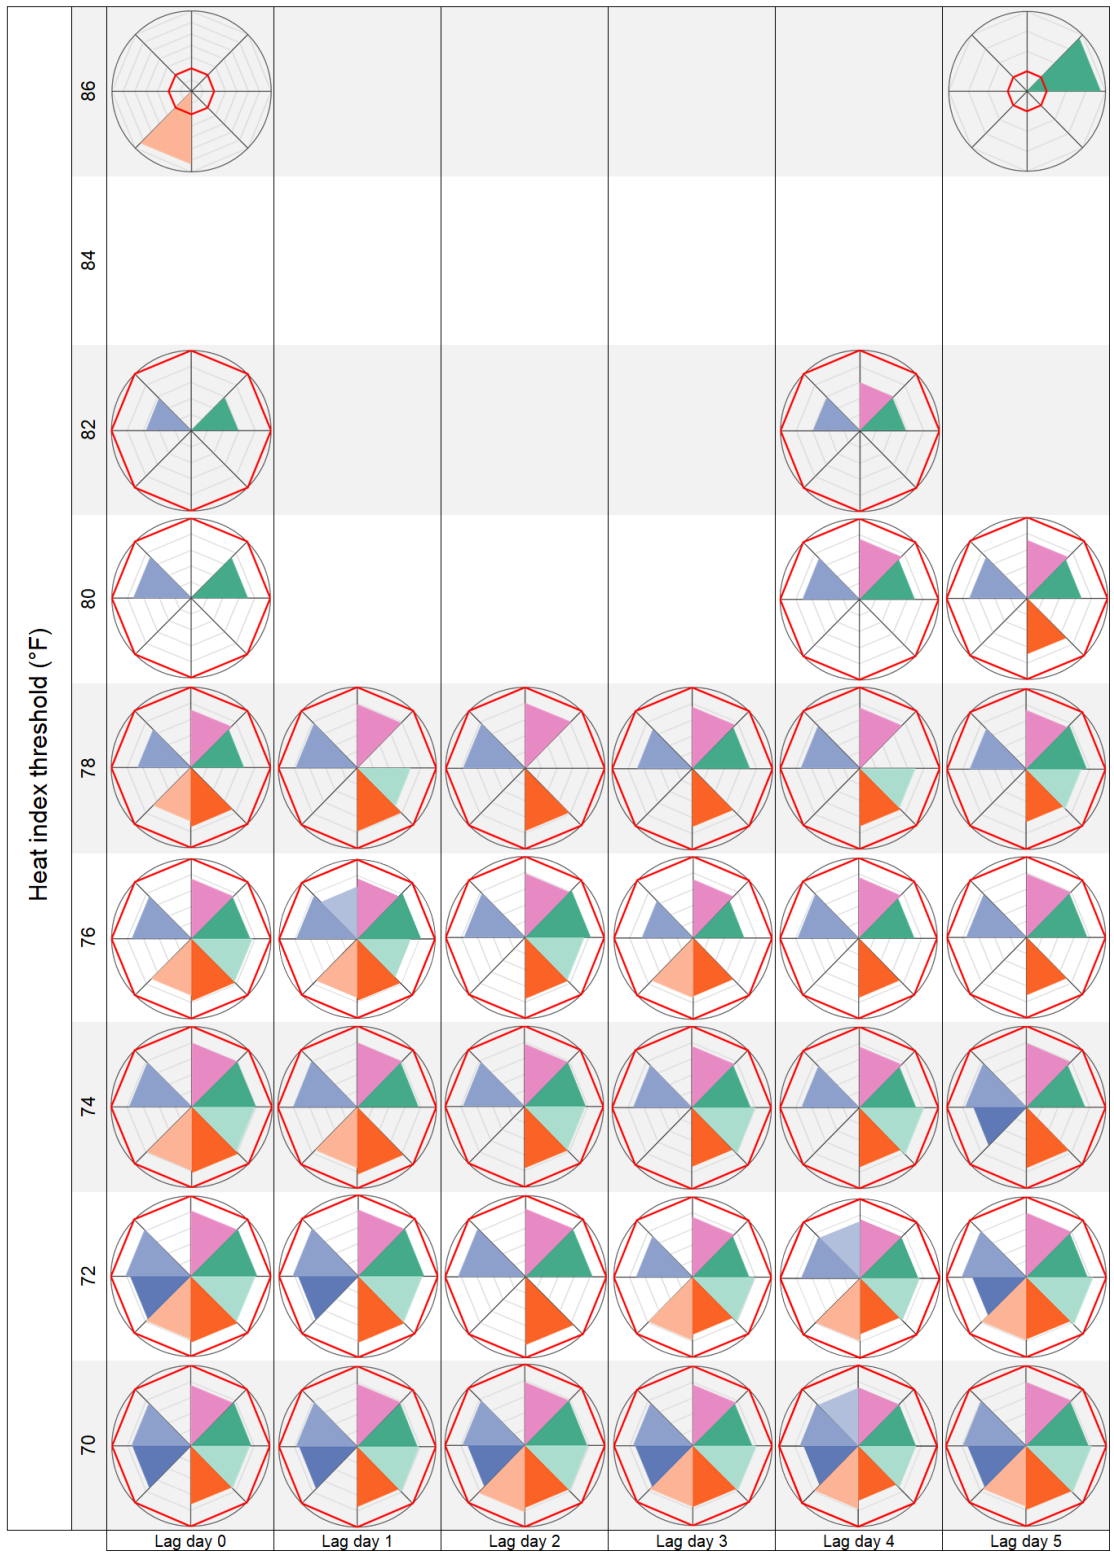

Figure S3. Significant odds ratios (95% CI does not include the null) for bronchitis-related emergency department visits by demographic group on days above vs. below the Heat Index (HI) threshold, in Anchorage, Fairbanks, and the Matanuska-Susitna Valley, Alaska, 2015- 2019. Conditional logistic regression models adjusted for daily  $PM_{2.5}$  concentration were used to estimate odds ratios. See Figure S1 for legend. Data for this figure can be found in Tables S1a-1, Tables S2a-1, and Tables S3a-r.

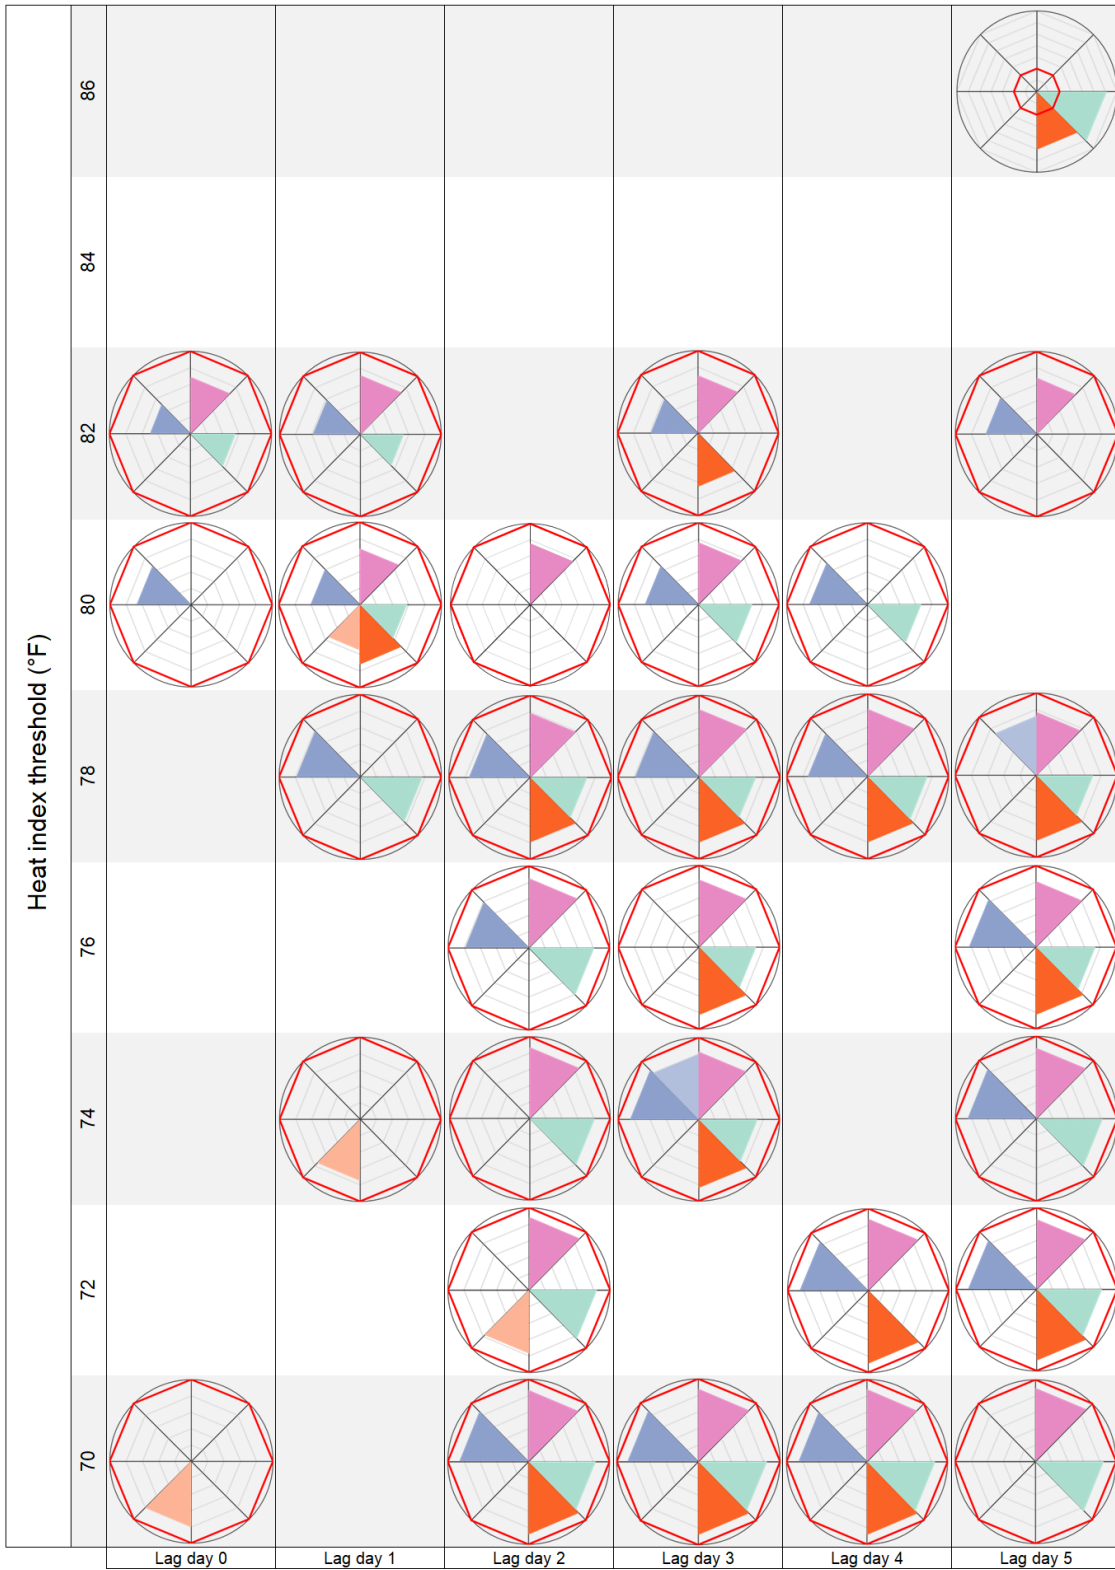

Figure S4. Significant odds ratios (95% CI does not include the null) for COPD-related emergency department visits by demographic group on days above vs. below the Heat Index (HI) threshold, in Anchorage, Fairbanks, and the Matanuska-Susitna Valley, Alaska, 2015- 2019. Conditional logistic regression models adjusted for daily  $PM_{2.5}$  concentration were used to estimate odds ratios. See Figure S1 for legend. Data for this figure can be found in Tables S1a-1, Tables S2a-l, and Tables S3a-r.

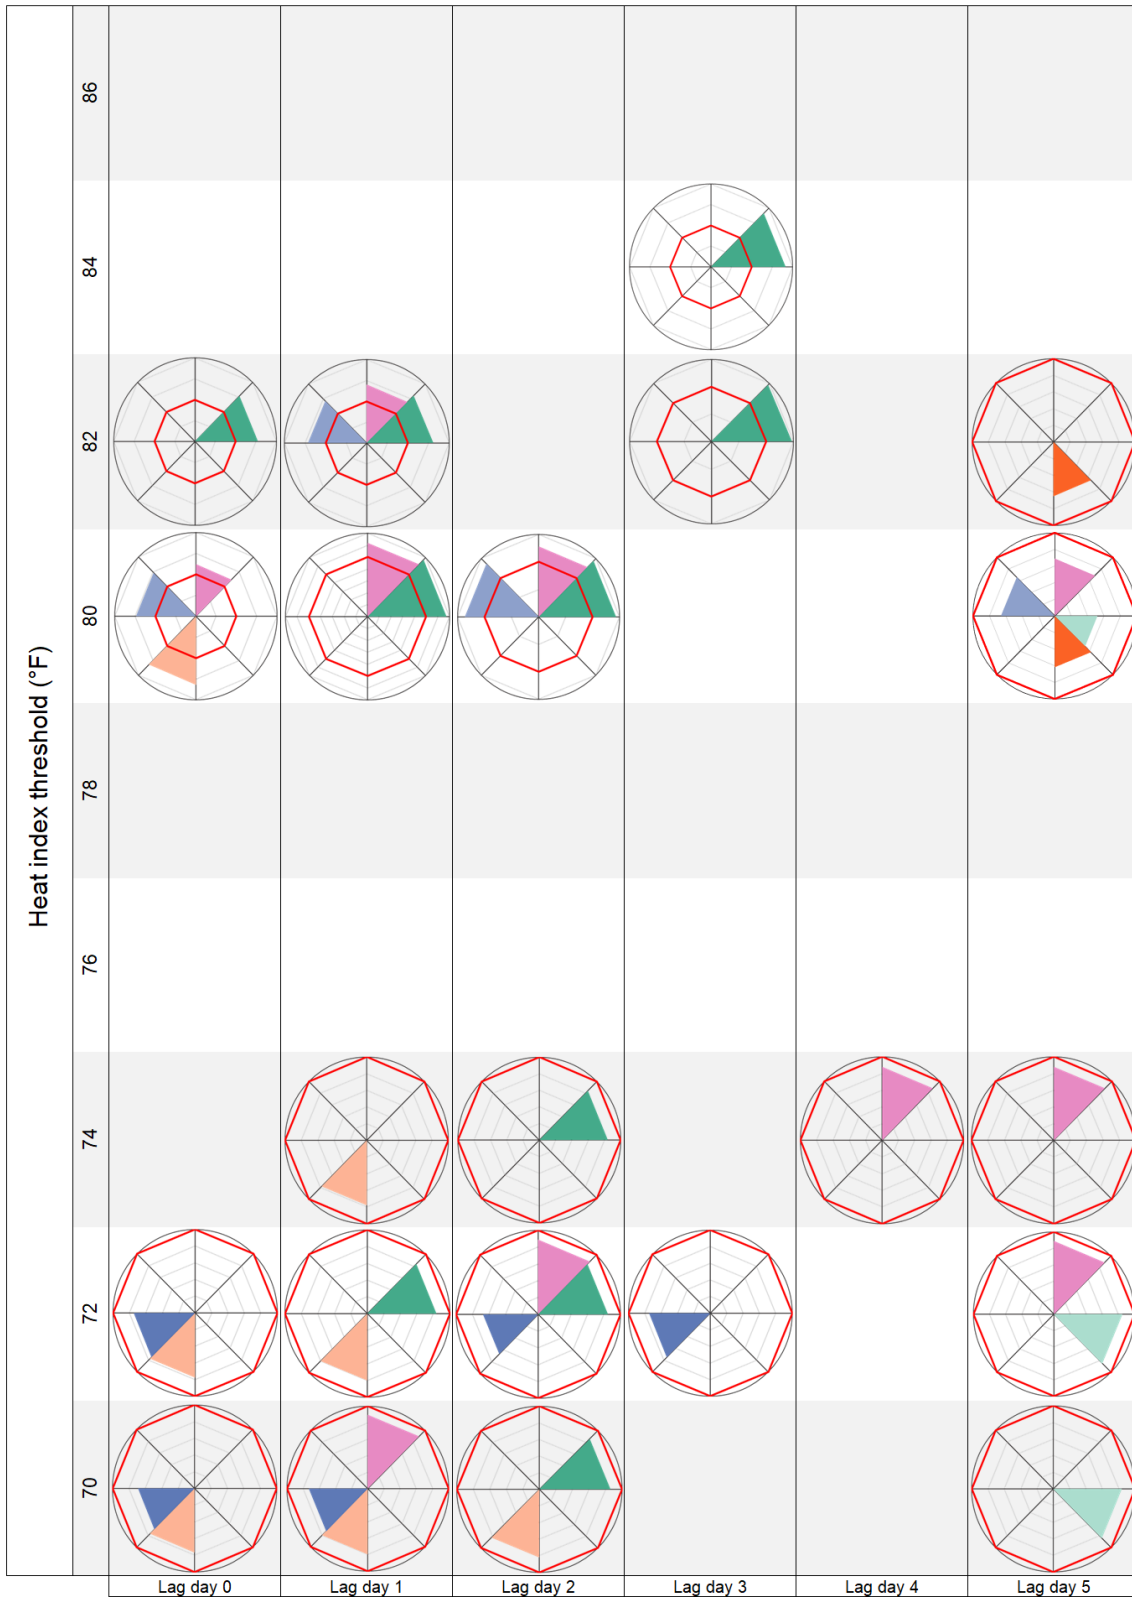

Figure S5. Significant odds ratios (95% CI does not include the null) for pneumonia-related emergency department visits by demographic group on days above vs. below the Heat Index (HI) threshold, in Anchorage, Fairbanks, and the Matanuska-Susitna Valley, Alaska, 2015- 2019. Conditional logistic regression models adjusted for daily  $PM_{2.5}$  concentration were used to estimate odds ratios. See Figure S1 for legend. Data for this figure can be found in Tables S1a-l, Tables S2a-l, and Tables S3a-r.

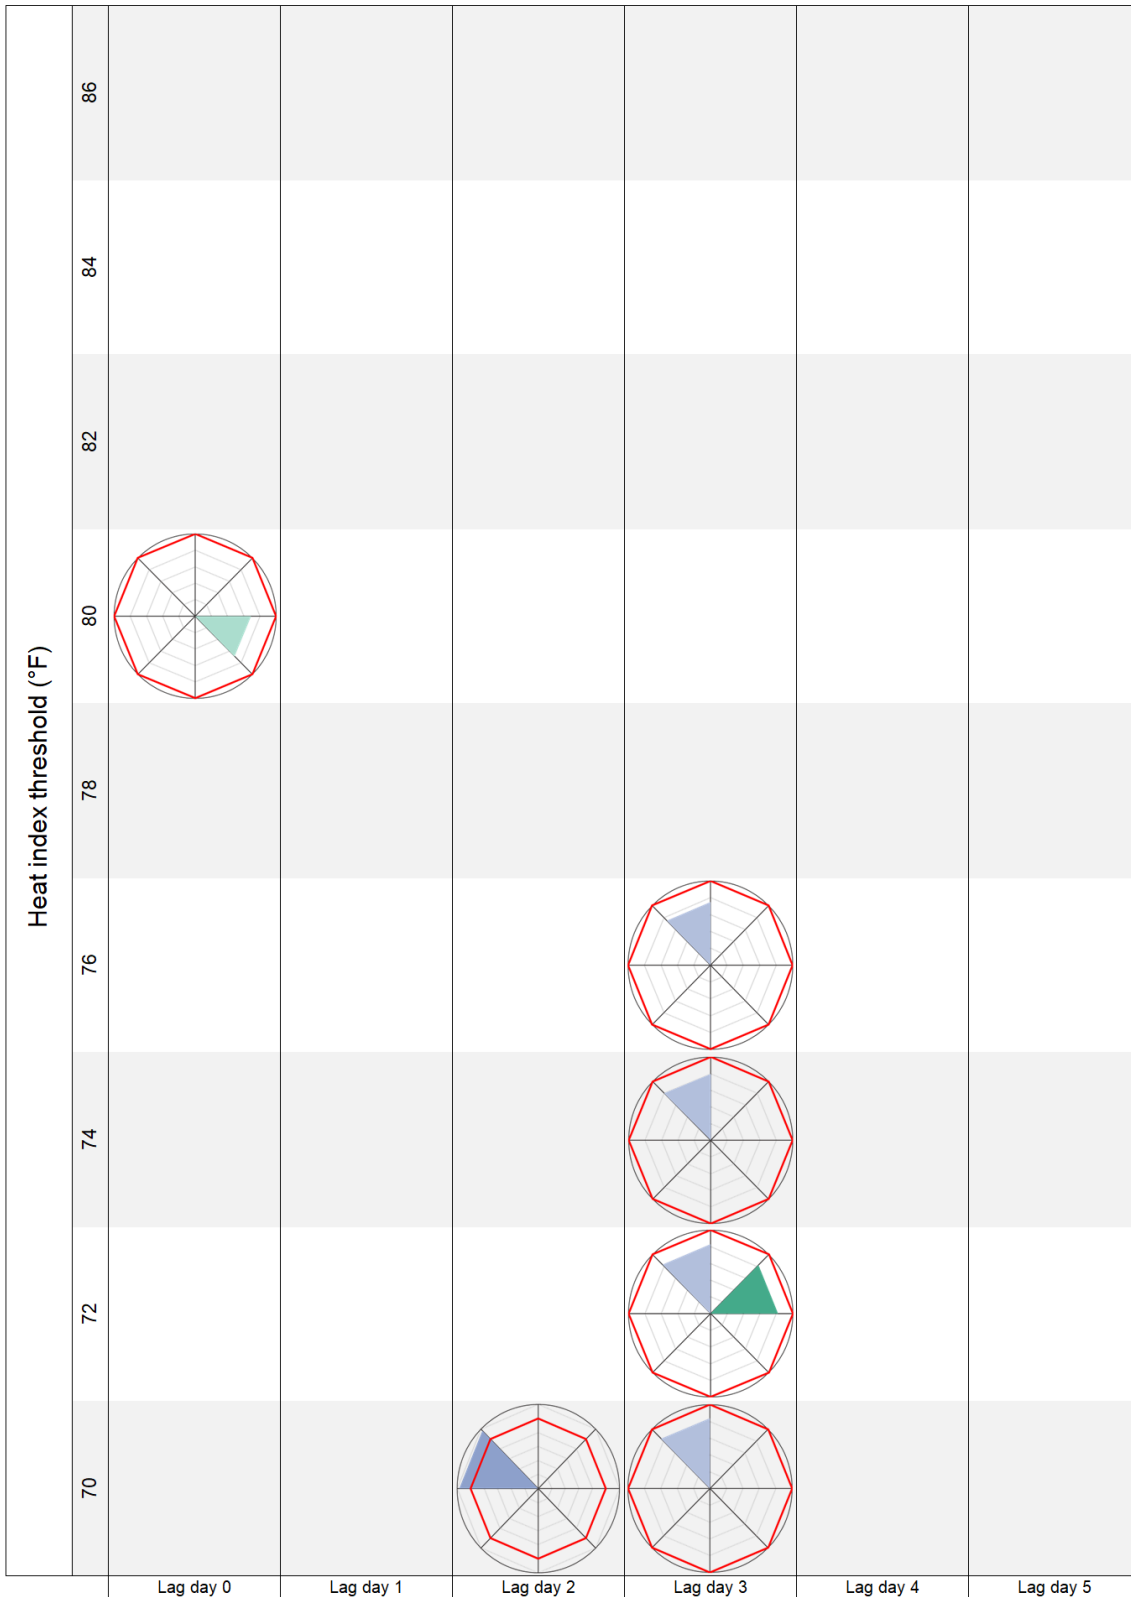

Figure S6. Significant odds ratios (95% CI does not include the null) for arrhythmia-related emergency department visits by demographic group on days above vs. below the Heat Index (HI) threshold, in Anchorage, Fairbanks, and the Matanuska-Susitna Valley, Alaska, 2015- 2019. Conditional logistic regression models adjusted for daily PM<sub>2.5</sub> concentration were used to estimate odds ratios. See Figure S1 for legend. Data for this figure can be found in Tables S1a-l, Tables S2a-l, and Tables S3a-r.

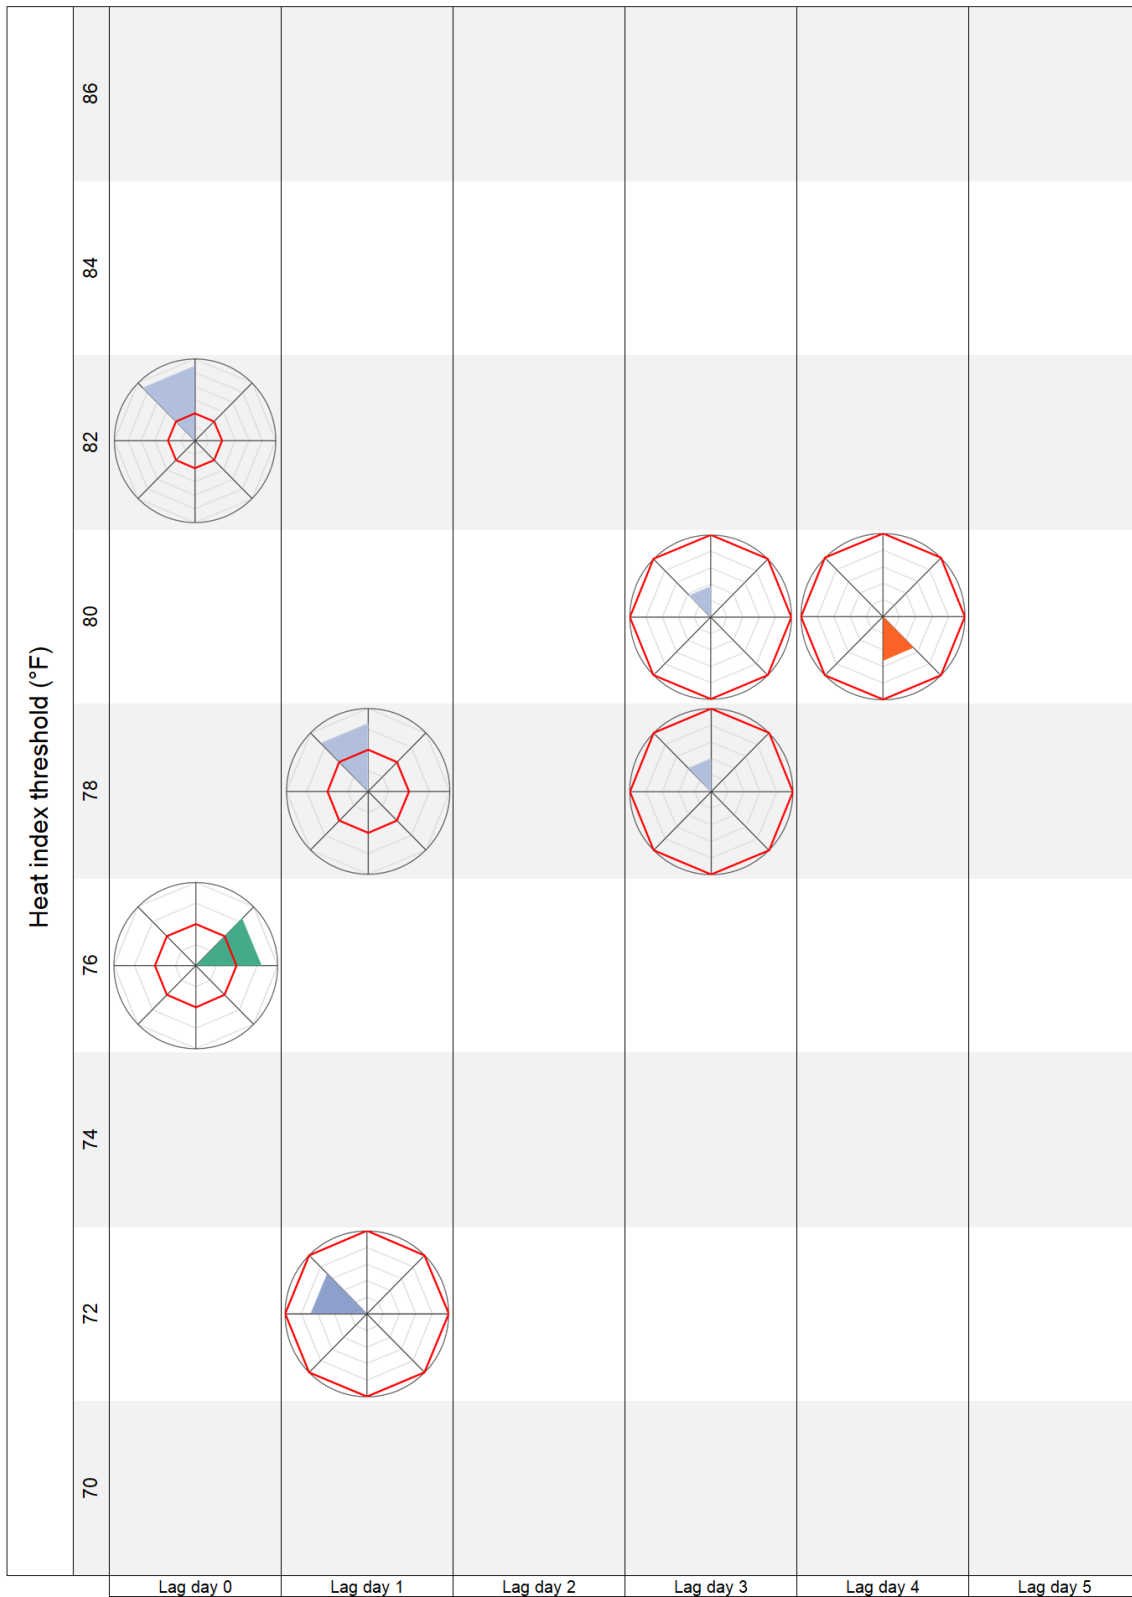

Figure S7. Significant odds ratios (95% CI does not include the null) for cerebrovascular-related emergency department visits by demographic group on days above vs. below the Heat Index (HI) threshold, in Anchorage, Fairbanks, and the Matanuska-Susitna Valley, Alaska, 2015- 2019. Conditional logistic regression models adjusted for daily PM<sub>2.5</sub> concentration were used to estimate odds ratios. See Figure S1 for legend. Data for this figure can be found in Tables S1a-l, Tables S2a-l, and Tables S3a-r.

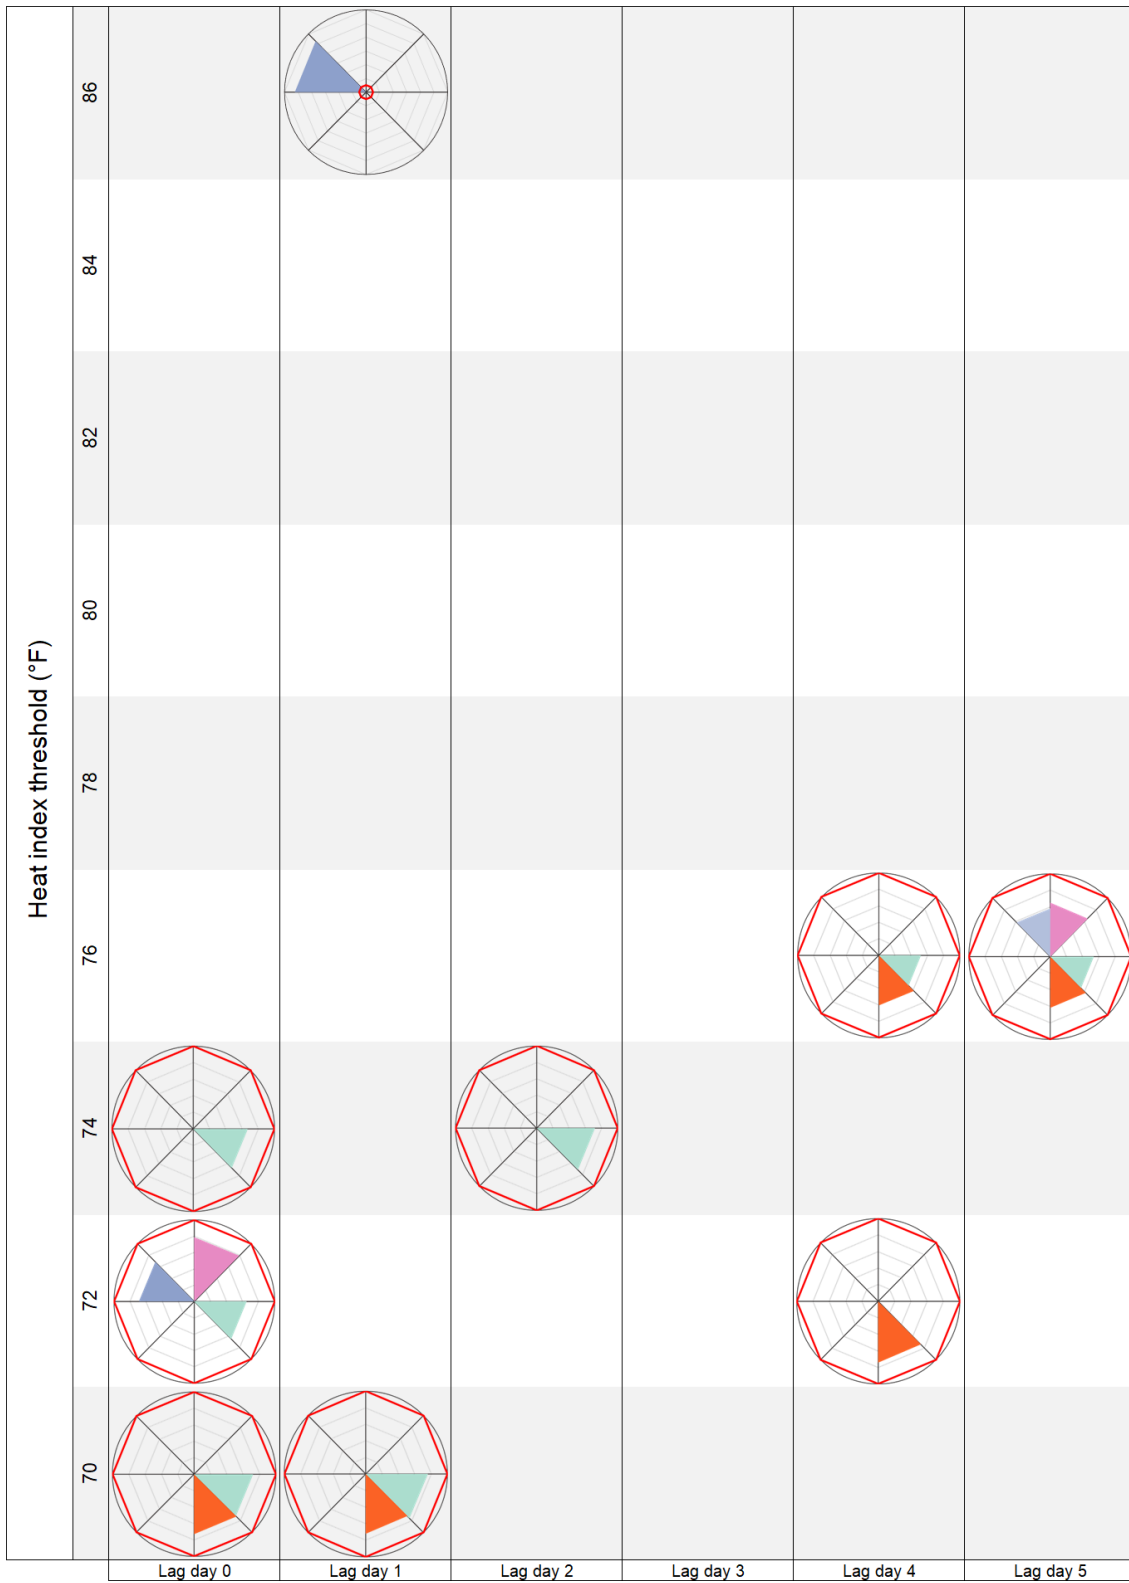

Figure S8. Significant odds ratios (95% CI does not include the null) for heart failure-related emergency department visits by demographic group on days above vs. below the Heat Index (HI) threshold, in Anchorage, Fairbanks, and the Matanuska-Susitna Valley, Alaska, 2015- 2019. Conditional logistic regression models adjusted for daily  $PM_{2.5}$  concentration were used to estimate odds ratios. See Figure S1 for legend. Data for this figure can be found in Tables S1a-1, Tables S2a-1, and Tables S3a-r.



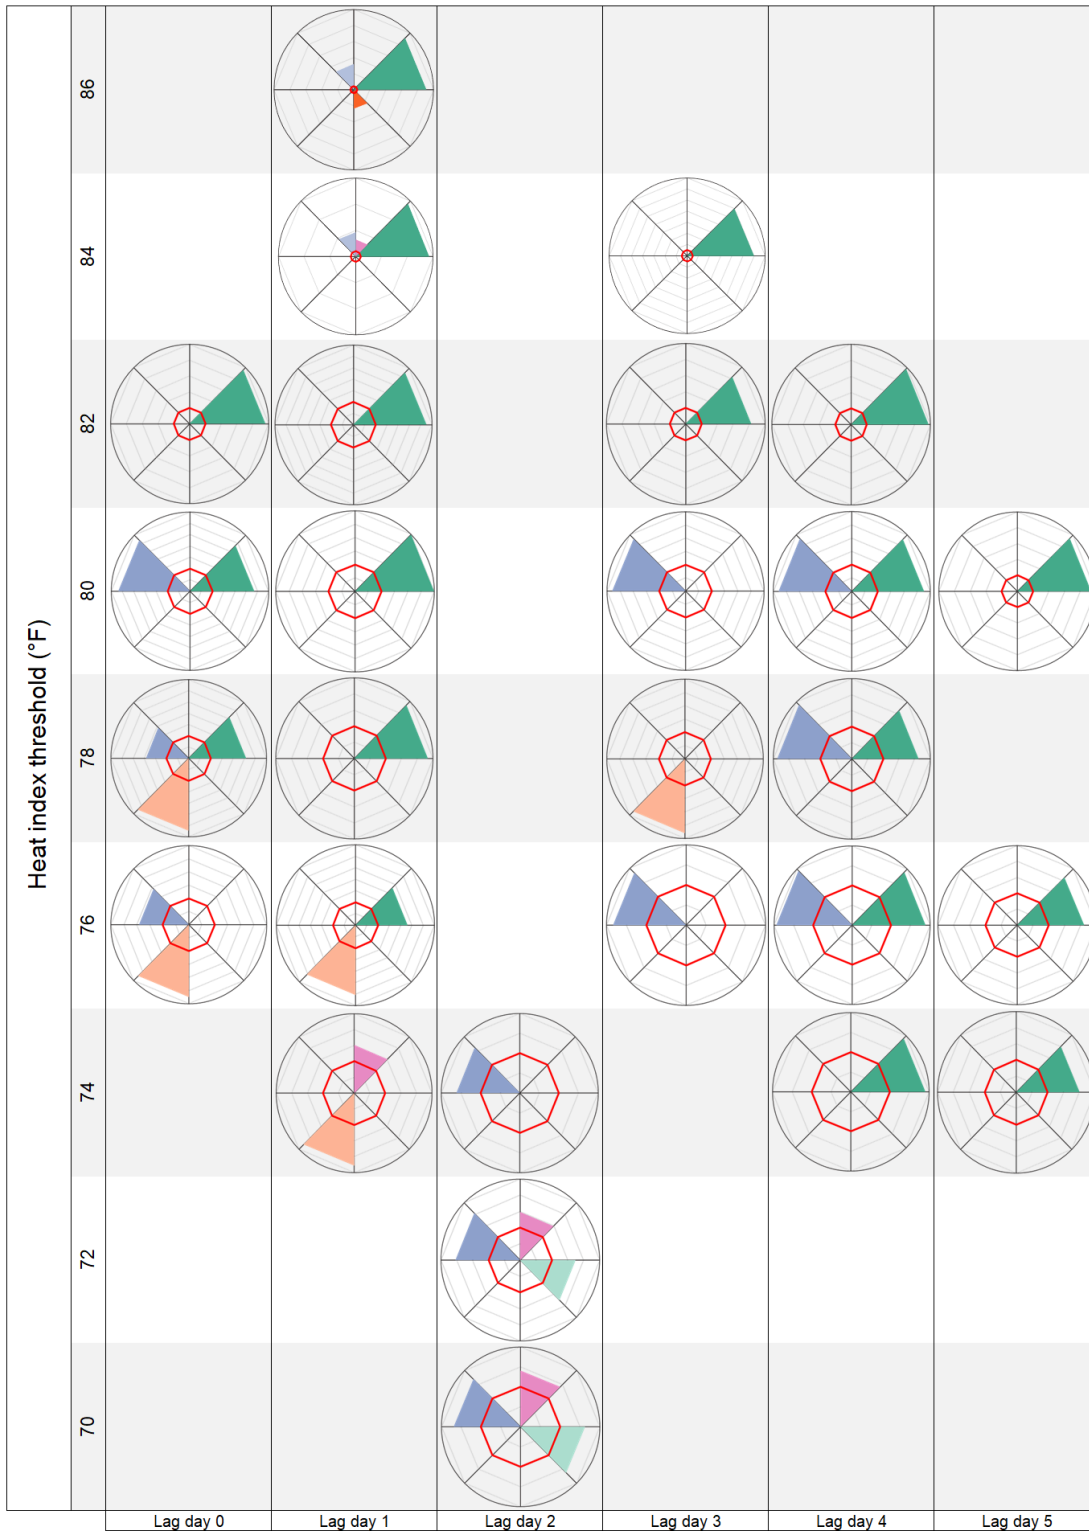

Figure S9. Significant odds ratios (95% CI does not include the null) for ischemia-related emergency department visits by demographic group on days above vs. below the Heat Index (HI) threshold, in Anchorage, Fairbanks, and the Matanuska-Susitna Valley, Alaska, 2015- 2019. Conditional logistic regression models adjusted for daily  $PM_{2.5}$  concentration were used to estimate odds ratios. See Figure S1 for legend. Data for this figure can be found in Tables S1a-1, Tables S2a-1, and Tables S3a-r.

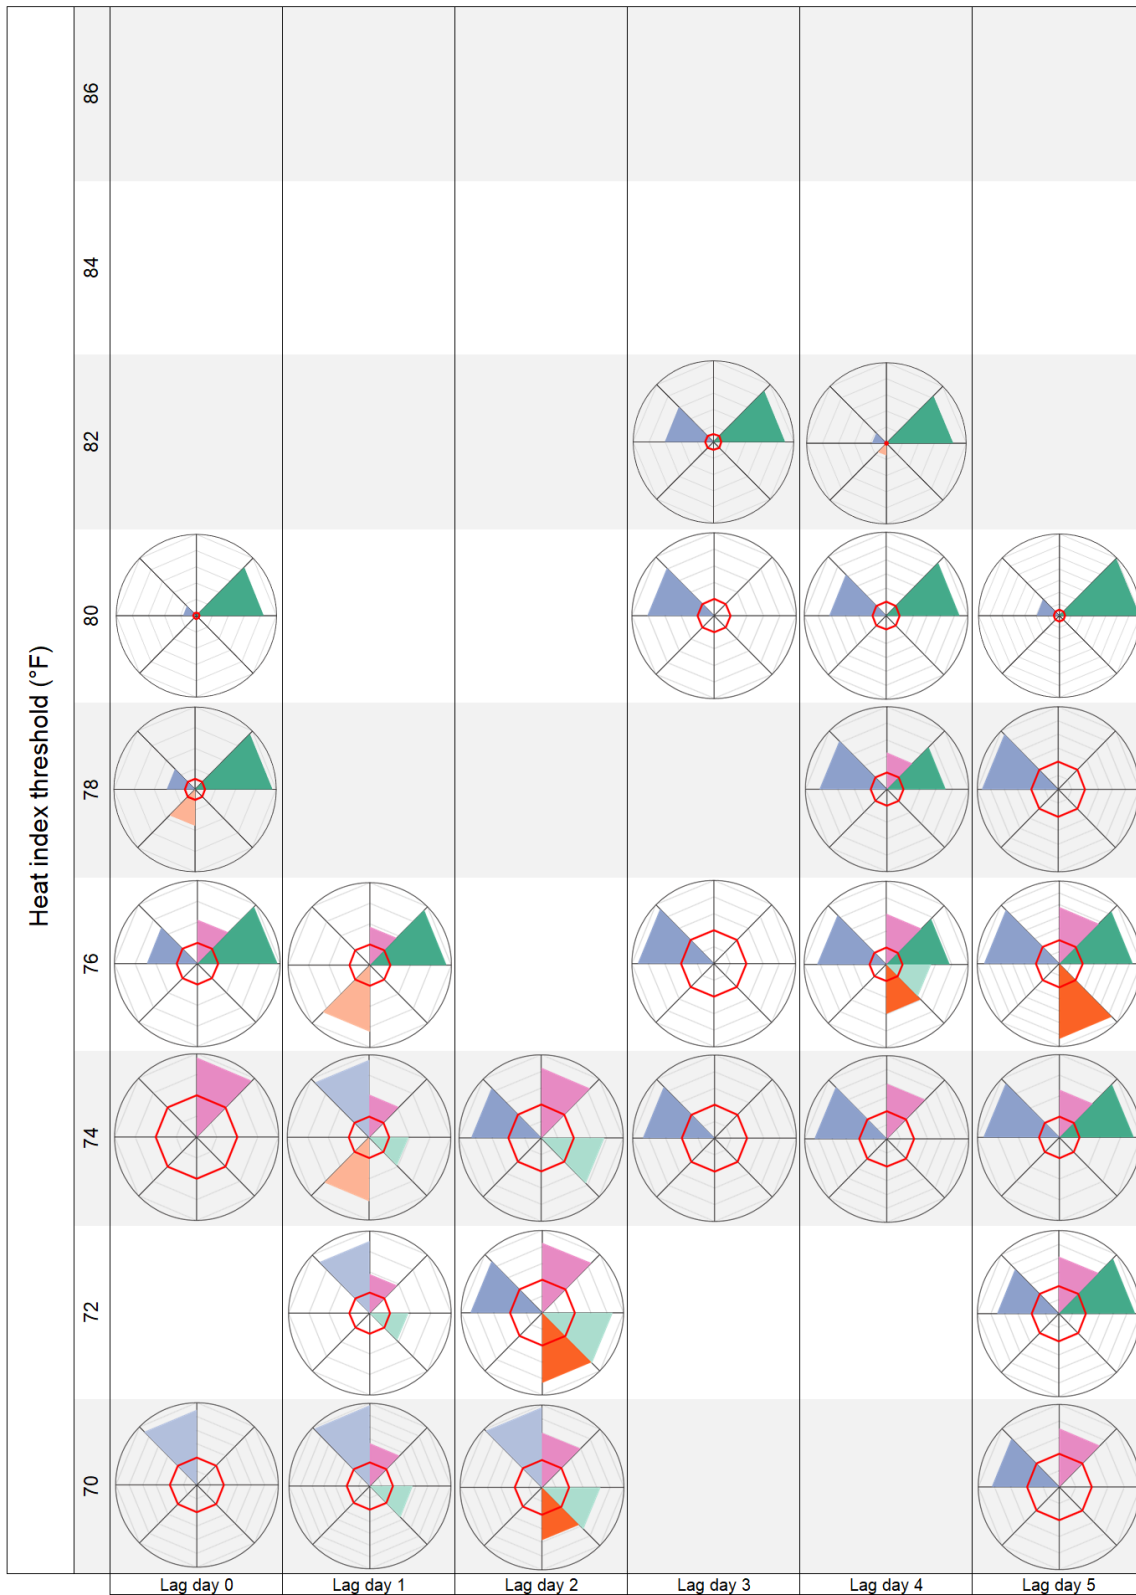

Figure S10. Significant odds ratios (95% CI does not include the null) for myocardial infarction-related emergency department visits by demographic group on days above vs. below the Heat Index (HI) threshold, in Anchorage, Fairbanks, and the Matanuska-Susitna Valley, Alaska, 2015- 2019. Conditional logistic regression models adjusted for daily  $PM_{2.5}$  concentration were used to estimate odds ratios. See Figure S1 for legend. Data for this figure can be found in Tables S1a-1, Tables S2a-1, and Tables S3a-r.

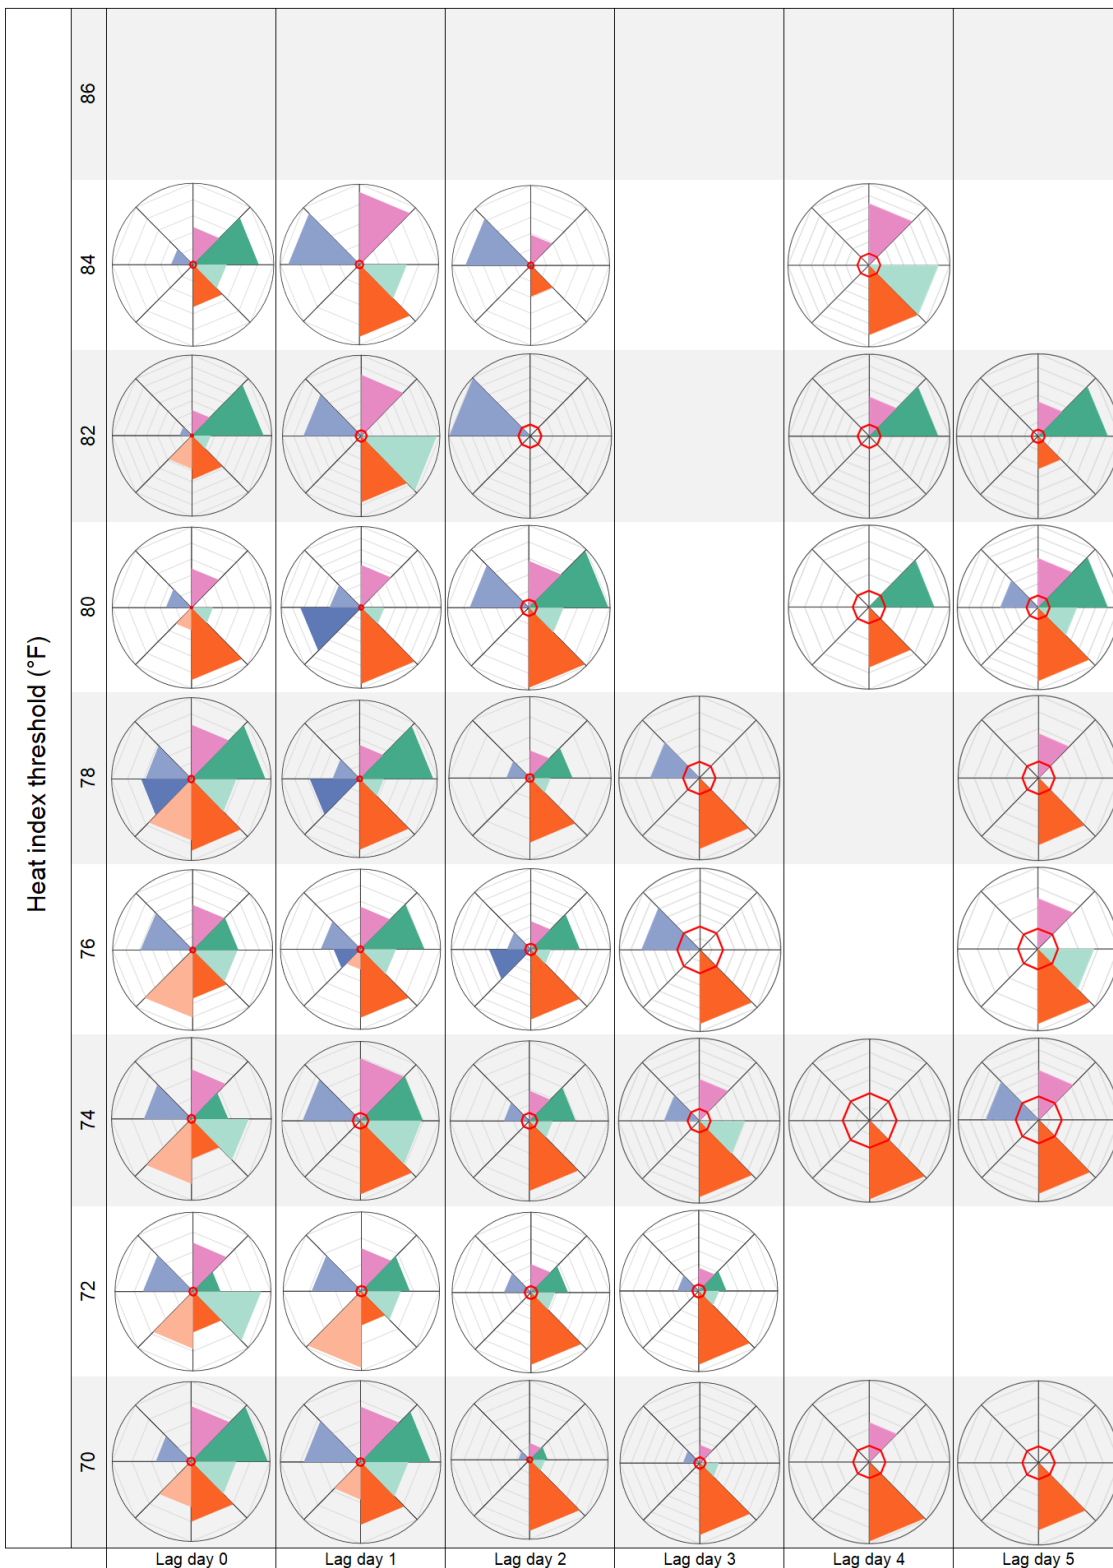

Figure S11. Significant odds ratios (95% CI does not include the null) for heat illness-related emergency department visits by demographic group on days above vs. below the Heat Index (HI) threshold, in Anchorage, Fairbanks, and the Matanuska-Susitna Valley, Alaska, 2015- 2019. Conditional logistic regression models adjusted for daily  $PM_{2.5}$  concentration were used to estimate odds ratios. See Figure S1 for legend. Data for this figure can be found in Tables S1a-1, Tables S2a-1, and Tables S3a-r.
