# Supplementary material
Source: PubMed Central journal article supplement (PMC10208429)
Supplement: ehp11363.smcontents.508.pdf [file ehp11363.smcontents.508.pdf]

**Note to readers with disabilities:** *EHP* strives to ensure that all journal content is accessible to all readers. However, some figures and Supplemental Material published in *EHP* articles may not conform to [508 standards](#) due to the complexity of the information being presented. If you need assistance accessing journal content, please contact [ehp508@niehs.nih.gov](mailto:ehp508@niehs.nih.gov). Our staff will work with you to assess and meet your accessibility needs within 3 working days.

### **Supplemental Material**

#### **Association of Temperature Thresholds with Heat Illness– and Cardiorespiratory-Related Emergency Visits during Summer Months in Alaska**

Micah B. Hahn, Grace Kuiper, and Sheryl Magzamen

#### **Table of Contents**

**Tables S1a-l.** Threshold analyses at Lags 0-5, stratified by sex

**Table S1a.** Threshold analyses at Lags 0-5, stratified by sex.

**Table S1b.** Odds ratios and 95% confidence intervals for emergency department (ED) visits among females for heat index (HI) on lag day 1 above versus below the threshold from single-day lag models in Anchorage, Fairbanks, and the Matanuska-Susitna Valley, Alaska, 2015-2019b.

**Table S1c.** Odds ratios and 95% confidence intervals for emergency department (ED) visits among females for heat index (HI) on lag day 2 above versus below the threshold from single-day lag models in Anchorage, Fairbanks, and the Matanuska-Susitna Valley, Alaska, 2015-2019.

**Table S1d.** Odds ratios and 95% confidence intervals for emergency department (ED) visits among females for heat index (HI) on lag day 3 above versus below the threshold from single-day lag models in Anchorage, Fairbanks, and the Matanuska-Susitna Valley, Alaska, 2015-2019.

**Table S1e.** Odds ratios and 95% confidence intervals for emergency department (ED) visits among females for heat index (HI) on lag day 4 above versus below the threshold from single-day lag models in Anchorage, Fairbanks, and the Matanuska-Susitna Valley, Alaska, 2015-2019.

**Table S1f.** Odds ratios and 95% confidence intervals for emergency department (ED) visits among females for heat index (HI) on lag day 5 above versus below the threshold from single-day lag models in Anchorage, Fairbanks, and the Matanuska-Susitna Valley, Alaska, 2015-2019.

**Table S1g.** Odds ratios and 95% confidence intervals for emergency department (ED) visits among males for same-day heat index (HI) above versus below the threshold from single-day lag models in Anchorage, Fairbanks, and the Matanuska-Susitna Valley, Alaska, 2015-2019.

**Table S1h.** Odds ratios and 95% confidence intervals for emergency department (ED) visits among males for heat index (HI) on lag day 1 above versus below the threshold from single-day lag models in Anchorage, Fairbanks, and the Matanuska-Susitna Valley, Alaska, 2015-2019.

**Table S1i.** Odds ratios and 95% confidence intervals for emergency department (ED) visits among males for heat index (HI) on lag day 2 above versus below the threshold from single-day lag models in Anchorage, Fairbanks, and the Matanuska-Susitna Valley, Alaska, 2015-2019.

**Table S1j.** Odds ratios and 95% confidence intervals for emergency department (ED) visits among males for heat index (HI) on lag day 3 above versus below the threshold from single-day lag models in Anchorage, Fairbanks, and the Matanuska-Susitna Valley, Alaska, 2015-2019.

**Table S1k.** Odds ratios and 95% confidence intervals for emergency department (ED) visits among males for heat index (HI) on lag day 4 above versus below the threshold from single-day lag models in Anchorage, Fairbanks, and the Matanuska-Susitna Valley, Alaska, 2015-2019.

**Table S1l.** Odds ratios and 95% confidence intervals for emergency department (ED) visits among males for heat index (HI) on lag day 5 above versus below the threshold from single-day lag models in Anchorage, Fairbanks, and the Matanuska-Susitna Valley, Alaska, 2015-2019.

**Tables S2a-l.** Threshold analyses at Lags 0-5, stratified by race.

**Table S2a.** Odds ratios and 95% confidence intervals for emergency department (ED) visits among Alaskan Native people for same-day heat index (HI) above versus below the threshold from single-day lag models in Anchorage, Fairbanks, and the Matanuska-Susitna Valley, Alaska, 2015-2019.

**Table S2b.** Odds ratios and 95% confidence intervals for emergency department (ED) visits among Alaskan Native people for heat index (HI) on lag day 1 above versus below the threshold from single-day lag models in Anchorage, Fairbanks, and the Matanuska-Susitna Valley, Alaska, 2015-2019.

**Table S2b.** Odds ratios and 95% confidence intervals for emergency department (ED) visits among Alaskan Native people for heat index (HI) on lag day 1 above versus below the threshold from single-day lag models in Anchorage, Fairbanks, and the Matanuska-Susitna Valley, Alaska, 2015-2019.

**Table S2c.** Odds ratios and 95% confidence intervals fo emergency department (ED) visits among Alaskan Native people for heat index (HI) on lag day 2 above versus below the threshold from single-day lag models in Anchorage, Fairbanks, and the Matanuska-Susitna Valley, Alaska, 2015-2019.

**Table S2d.** Odds ratios and 95% confidence intervals for emergency department (ED) visits among Alaskan Native people for heat index (HI) on lag day 3 above versus below the threshold from single-day lag models in Anchorage, Fairbanks, and the Matanuska-Susitna Valley, Alaska, 2015-2019.

**Table S2e.** Odds ratios and 95% confidence intervals for emergency department (ED) visits among Alaskan Native people for heat index (HI) on lag day 4 above versus below the threshold from single-day lag models in Anchorage, Fairbanks, and the Matanuska-Susitna Valley, Alaska, 2015-2019.

**Table S2f.** Odds ratios and 95% confidence intervals for emergency department (ED) visits among Alaskan Native people for heat index (HI) on lag day 5 above versus below the threshold from single-day lag models in Anchorage, Fairbanks, and the Matanuska-Susitna Valley, Alaska, 2015-2019.

**Table S2g.** Odds ratios and 95% confidence intervals for emergency department (ED) visits among Non-Alaskan Native people for same-day heat index (HI) above versus below the threshold from single-day lag models in Anchorage, Fairbanks, and the Matanuska-Susitna Valley, Alaska, 2015-2019.

**Table S2h.** Odds ratios and 95% confidence intervals for emergency department (ED) visits among Non-Alaskan Native people for heat index (HI) on lag day 1 above versus below the threshold from single-day lag models in Anchorage, Fairbanks, and the Matanuska-Susitna Valley, Alaska, 2015-2019.

**Table S2i.** Odds ratios and 95% confidence intervals for emergency department (ED) visits among Non-Alaskan Native people for heat index (HI) on lag day 2 above versus below the threshold from single-day lag models in Anchorage, Fairbanks, and the Matanuska-Susitna Valley, Alaska, 2015-2019.

**Table S2j.** Odds ratios and 95% confidence intervals for emergency department (ED) visits among Non-Alaskan Native people for heat index (HI) on lag day 3 above versus below the threshold from single-day lag models in Anchorage, Fairbanks, and the Matanuska-Susitna Valley, Alaska, 2015-2019.

**Table S2k.** Odds ratios and 95% confidence intervals for emergency department (ED) visits among Non-Alaskan Native people for heat index (HI) on lag day 4 above versus below the threshold from single-day lag models in Anchorage, Fairbanks, and the Matanuska-Susitna Valley, Alaska, 2015-2019.

**Table S2l.** Odds ratios and 95% confidence intervals for emergency department (ED) visits among Non-Alaskan Native people for heat index (HI) on lag day 5 above versus below the threshold from single-day lag models in Anchorage, Fairbanks, and the Matanuska-Susitna Valley, Alaska, 2015-2019.

**Tables S3a-r.** Threshold analyses at Lags 0-5, stratified by age

**Table S3a.** Odds ratios and 95% confidence intervals for emergency department (ED) visits among <15-year-olds for same-day heat index (HI) above versus below the threshold from single-day lag models in Anchorage, Fairbanks, and the Matanuska-Susitna Valley, Alaska, 2015-2019.

**Table S3b.** Odds ratios and 95% confidence intervals for emergency department (ED) visits among <15-year-olds for heat index (HI) on lag day 1 above versus below the threshold from single-day lag models in Anchorage, Fairbanks, and the Matanuska-Susitna Valley, Alaska, 2015-2019.

**Table S3c.** Odds ratios and 95% confidence intervals for emergency department (ED) visits among <15-year-olds for heat index (HI) on lag day 2 above versus below the threshold from single-day lag models in Anchorage, Fairbanks, and the Matanuska-Susitna Valley, Alaska, 2015-2019.

**Table S3d.** Odds ratios and 95% confidence intervals for emergency department (ED) visits among <15-year-olds for heat index (HI) on lag day 3 above versus below the threshold from single-day lag models in Anchorage, Fairbanks, and the Matanuska-Susitna Valley, Alaska, 2015-2019.

**Table S3e.** Odds ratios and 95% confidence intervals for emergency department (ED) visits among <15-year-olds for heat index (HI) on lag day 4 above versus below the threshold from single-day lag models in Anchorage, Fairbanks, and the Matanuska-Susitna Valley, Alaska, 2015-2019.

**Table S3f.** Odds ratios and 95% confidence intervals for emergency department (ED) visits among <15-year-olds for heat index (HI) on lag day 5 above versus below the threshold from single-day lag models in Anchorage, Fairbanks, and the Matanuska-Susitna Valley, Alaska, 2015-2019.

**Table S3g.** Odds ratios and 95% confidence intervals for emergency department (ED) visits among 15-65 year-olds for same-day heat index (HI) above versus below the threshold from single-day lag models in Anchorage, Fairbanks, and the Matanuska-Susitna Valley, Alaska, 2015-2019.

**Table S3h.** Odds ratios and 95% confidence intervals for emergency department (ED) visits among 15-65 year-olds for heat index (HI) on lag day 1 above versus below the threshold from single-day lag models in Anchorage, Fairbanks, and the Matanuska-Susitna Valley, Alaska, 2015-2019.

**Table S3i.** Odds ratios and 95% confidence intervals for emergency department (ED) visits among 15-65 year-olds for heat index (HI) on lag day 2 above versus below the threshold from single-day lag models in Anchorage, Fairbanks, and the Matanuska-Susitna Valley, Alaska, 2015-2019.

**Table S3j.** Odds ratios and 95% confidence intervals for emergency department (ED) visits among 15-65 year-olds for heat index (HI) on lag day 3 above versus below the threshold from single-day lag models in Anchorage, Fairbanks, and the Matanuska-Susitna Valley, Alaska, 2015-2019.

**Table S3k.** Odds ratios and 95% confidence intervals for emergency department (ED) visits among 15-65 year-olds for heat index (HI) on lag day 4 above versus below the threshold from single-day lag models in Anchorage, Fairbanks, and the Matanuska-Susitna Valley, Alaska, 2015-2019.

**Table S3l.** Odds ratios and 95% confidence intervals for emergency department (ED) visits among 15-65 year-olds for heat index (HI) on lag day 5 above versus below the threshold from single-day lag models in Anchorage, Fairbanks, and the Matanuska-Susitna Valley, Alaska, 2015-2019.

**Table S3m.** Odds ratios and 95% confidence intervals for emergency department (ED) visits among >65-year-olds for same-day heat index (HI) above versus below the threshold from single-day lag models in Anchorage, Fairbanks, and the Matanuska-Susitna Valley, Alaska, 2015-2019.

**Table S3n.** Odds ratios and 95% confidence intervals for ED emergency department (ED) visits among >65-year-olds for heat index (HI) on lag day 1 above versus below the threshold from single-day lag models in Anchorage, Fairbanks, and the Matanuska-Susitna Valley, Alaska, 2015-2019.

**Table S3o.** Odds ratios and 95% confidence intervals for emergency department (ED) visits among >65-year-olds for heat index (HI) on lag day 2 above versus below the threshold from single-day lag models in Anchorage, Fairbanks, and the Matanuska-Susitna Valley, Alaska, 2015-2019.

**Table S3p.** Odds ratios and 95% confidence intervals for emergency department (ED) visits among >65-year-olds for heat index (HI) on lag day 3 above versus below the threshold from single-day lag models in Anchorage, Fairbanks, and the Matanuska-Susitna Valley, Alaska, 2015-2019.

**Table S3q.** Odds ratios and 95% confidence intervals for emergency department (ED) visits among >65-year-olds for heat index (HI) on lag day 4 above versus below the threshold from single-day lag models in Anchorage, Fairbanks, and the Matanuska-Susitna Valley, Alaska, 2015-2019.

**Table S3r.** Odds ratios and 95% confidence intervals for emergency department (ED) visits among >65-year-olds for heat index (HI) on lag day 5 above versus below the threshold from single-day lag models in Anchorage, Fairbanks, and the Matanuska-Susitna Valley, Alaska, 2015-2019.

**Tables S4a-g.** Acute heatwave analysis stratified by sex, race, and age

**Table S4a.** Odds ratios and 95% confidence intervals for emergency department (ED) visits on heatwave days versus non-heatwave days among females in Anchorage, Fairbanks, and the Matanuska-Susitna Valley, Alaska, 2015-2019.

**Table S4b.** Odds ratios and 95% confidence intervals for emergency department (ED) visits on heatwave days versus non-heatwave days among males in Anchorage, Fairbanks, and the Matanuska-Susitna Valley, Alaska, 2015-2019.

**Table S4c.** Odds ratios and 95% confidence intervals for emergency department (ED) visits on heatwave days versus non-heatwave days among Alaska Native people in Anchorage, Fairbanks, and the Matanuska-Susitna Valley, Alaska, 2015-2019.

**Table S4d.** Odds ratios and 95% confidence intervals for emergency department (ED) visits on heatwave days versus non-heatwave days among non-Alaska Native people in Anchorage, Fairbanks, and the Matanuska-Susitna Valley, Alaska, 2015-2019.

**Table S4e.** Odds ratios and 95% confidence intervals for emergency department (ED) visits on heatwave days versus non-heatwave days among <15-year-olds in Anchorage, Fairbanks, and the Matanuska-Susitna Valley, Alaska, 2015-2019.

**Table S4f.** Odds ratios and 95% confidence intervals for emergency department (ED) visits on heatwave days versus non-heatwave days among 15-65 year-olds in Anchorage, Fairbanks, and the Matanuska-Susitna Valley, Alaska, 2015-2019.

**Table S4g.** Odds ratios and 95% confidence intervals for emergency department (ED) visits on heatwave days versus non-heatwave days among >65-year-olds in Anchorage, Fairbanks, and the Matanuska-Susitna Valley, Alaska, 2015-2019.

**Tables S5a-g.** Ongoing heatwave analysis stratified by sex, race, and age

**Table S5a.** Odds ratios and 95% confidence intervals for one additional previous day on which the observed heat index (HI) was above the indicated threshold among females in Anchorage, Fairbanks, and the Matanuska-Susitna Valley, Alaska, 2015-2019.

**Table S5b.** Odds ratios and 95% confidence intervals for one additional previous day on which the observed heat index (HI) was above the indicated threshold among males in Anchorage, Fairbanks, and the Matanuska-Susitna Valley, Alaska, 2015-2019.

**Table S5c.** Odds ratios and 95% confidence intervals for one additional previous day on which the observed heat index (HI) was above the indicated threshold among Alaska Native people in Anchorage, Fairbanks, and the Matanuska-Susitna Valley, Alaska, 2015-2019.

**Table S5d.** Odds ratios and 95% confidence intervals for one additional previous day on which the observed heat index (HI) was above the indicated threshold among non-Alaska Native people in Anchorage, Fairbanks, and the Matanuska-Susitna Valley, Alaska, 2015-2019.

**Table S5e.** Odds ratios and 95% confidence intervals for one additional previous day on which the observed heat index (HI) was above the indicated threshold among <15 year-olds in Anchorage, Fairbanks, and the Matanuska-Susitna Valley, Alaska, 2015-2019.

**Table S5f.** Odds ratios and 95% confidence intervals for one additional previous day on which the observed heat index (HI) was above the indicated threshold among 15-65 year olds in Anchorage, Fairbanks, and the Matanuska-Susitna Valley, Alaska, 2015-2019.

**Table S5g.** Odds ratios and 95% confidence intervals for one additional previous day on which the observed heat index (HI) was above the indicated threshold among >65 year-olds in Anchorage, Fairbanks, and the Matanuska-Susitna Valley, Alaska, 2015-2019.

**Figure S1.** Legend for all Supplemental Figures.

**Figure S2.** Significant odds ratios (95% CI does not include the null) for asthma-related emergency department visits by demographic group on days above vs. below the Heat Index (HI) threshold, in Anchorage, Fairbanks, and the Matanuska-Susitna Valley, Alaska, 2015- 2019. Conditional logistic regression models adjusted for daily PM<sub>2.5</sub> concentration were used to estimate odds ratios. See Figure S1 for legend. Data for this figure can be found in Tables S1a-1, Tables S2a-1, and Tables S3a-r.

**Figure S3.** Significant odds ratios (95% CI does not include the null) for bronchitis-related emergency department visits by demographic group on days above vs. below the Heat Index (HI) threshold, in Anchorage, Fairbanks, and the Matanuska-Susitna Valley, Alaska, 2015- 2019. Conditional logistic regression models adjusted for daily PM<sub>2.5</sub> concentration were used to estimate odds ratios. See Figure S1 for legend. Data for this figure can be found in Tables S1a-1, Tables S2a-1, and Tables S3a-r.

**Figure S4.** Significant odds ratios (95% CI does not include the null) for COPD-related emergency department visits by demographic group on days above vs. below the Heat Index (HI) threshold, in Anchorage, Fairbanks, and the Matanuska-Susitna Valley, Alaska, 2015- 2019. Conditional logistic regression models adjusted for daily PM<sub>2.5</sub> concentration were used to estimate odds ratios. See Figure S1 for legend. Data for this figure can be found in Tables S1a-1, Tables S2a-1, and Tables S3a-r.

**Figure S5.** Significant odds ratios (95% CI does not include the null) for pneumonia-related emergency department visits by demographic group on days above vs. below the Heat Index (HI) threshold, in Anchorage, Fairbanks, and the Matanuska-Susitna Valley, Alaska, 2015- 2019. Conditional logistic regression models adjusted for daily PM<sub>2.5</sub> concentration were used to estimate odds ratios. See Figure S1 for legend. Data for this figure can be found in Tables S1a-1, Tables S2a-1, and Tables S3a-r.

**Figure S6.** Significant odds ratios (95% CI does not include the null) for arrhythmia-related emergency department visits by demographic group on days above vs. below the Heat Index (HI) threshold, in Anchorage, Fairbanks, and the Matanuska-Susitna Valley, Alaska, 2015- 2019. Conditional logistic regression models adjusted for daily PM<sub>2.5</sub> concentration were used to estimate odds ratios. See Figure S1 for legend. Data for this figure can be found in Tables S1a-1, Tables S2a-1, and Tables S3a-r.

**Figure S7.** Significant odds ratios (95% CI does not include the null) for cerebrovascular-related emergency department visits by demographic group on days above vs. below the Heat Index (HI) threshold, in Anchorage, Fairbanks, and the Matanuska-Susitna Valley, Alaska, 2015- 2019. Conditional logistic regression models adjusted for daily PM<sub>2.5</sub> concentration were used to estimate odds ratios. See Figure S1 for legend. Data for this figure can be found in Tables S1a-1, Tables S2a-1, and Tables S3a-r.

**Figure S8.** Significant odds ratios (95% CI does not include the null) for heart failure-related emergency department visits by demographic group on days above vs. below the Heat Index (HI) threshold, in Anchorage, Fairbanks, and the Matanuska-Susitna Valley, Alaska, 2015- 2019. Conditional logistic regression models adjusted for daily PM<sub>2.5</sub> concentration were used to estimate odds ratios. See Figure S1 for legend. Data for this figure can be found in Tables S1a-1, Tables S2a-1, and Tables S3a-r.

**Figure S9.** Significant odds ratios (95% CI does not include the null) for ischemia-related emergency department visits by demographic group on days above vs. below the Heat Index (HI) threshold, in Anchorage, Fairbanks, and the Matanuska-Susitna Valley, Alaska, 2015- 2019. Conditional logistic regression models adjusted for daily PM<sub>2.5</sub> concentration were used to estimate odds ratios. See Figure S1 for legend. Data for this figure can be found in Tables S1a-1, Tables S2a-1, and Tables S3a-r.

**Figure S10.** Significant odds ratios (95% CI does not include the null) for myocardial infarction-related emergency department visits by demographic group on days above vs. below the Heat Index (HI) threshold, in Anchorage, Fairbanks, and the Matanuska-Susitna Valley, Alaska, 2015- 2019. Conditional logistic regression models adjusted for daily PM<sub>2.5</sub> concentration were used to estimate odds ratios. See Figure S1 for legend. Data for this figure can be found in Tables S1a-1, Tables S2a-1, and Tables S3a-r.

**Figure S11.** Significant odds ratios (95% CI does not include the null) for heat illness-related emergency department visits by demographic group on days above vs. below the Heat Index (HI) threshold, in Anchorage, Fairbanks, and the Matanuska-Susitna Valley, Alaska, 2015- 2019. Conditional logistic regression models adjusted for daily PM<sub>2.5</sub> concentration were used to estimate odds ratios. See Figure S1 for legend. Data for this figure can be found in Tables S1a-1, Tables S2a-1, and Tables S3a-r.
